# Supplementary material for: Metal-free catalytic cascade to chromones: direct coupling of salicylaldehydes and activated alkynes triggered by aryloxyl radicals
Source: Royal Society of Chemistry journal article supplement (doi:10.1039/c5ra24634b), 2015-01-01

**Metal-free Catalytic Cascade to Chromones: Direct  
Coupling of Salicylaldehydes and Activated Alkynes  
Triggered by Aryloxy Radical**

*Ping Wang,<sup>a,b,+</sup> Zhongfeng Li,<sup>a,+</sup> Shengli Cao,<sup>a</sup> and Honghua Rao<sup>\*a</sup>*

# Table of Contents

|                                                                                                               |     |
|---------------------------------------------------------------------------------------------------------------|-----|
| General experimental procedure .....                                                                          | S2  |
| Decarboxylation of product 3n to 7-hydroxyflavone <b>4</b> .....                                              | S2  |
| General procedure for the syntheses of methyl arylpropiolates.....                                            | S2  |
| Synthesis of ethyl dimethyl ( <i>E</i> )-2-(2-formylphenoxy)-2-butenedioate ( <b>5a</b> ) .....               | S3  |
| Synthesis of ethyl dimethyl ( <i>Z</i> )-2-(2-formylphenoxy)-2-butenedioate ( <b>5b</b> ) .....               | S3  |
| General procedure for the synthesis of chromones.....                                                         | S4  |
| The spectroscopic data of chromones .....                                                                     | S4  |
| Reference .....                                                                                               | S11 |
| Copy of the <sup>1</sup> H and <sup>13</sup> C NMR spectra of 7-hydroxyflavone ( <b>4</b> ) .....             | S12 |
| Copy of the <sup>1</sup> H NMR spectra of ( <i>E</i> )-2-(2-formylphenoxy)-2-butenedioate ( <b>5a</b> ) ..... | S14 |
| Copy of the <sup>1</sup> H NMR spectra of ( <i>Z</i> )-2-(2-formylphenoxy)-2-butenedioate ( <b>5b</b> ) ..... | S15 |
| Copies of the <sup>1</sup> H, <sup>13</sup> C and <sup>19</sup> F NMR spectra of chromones <b>3a-r</b> .....  | S16 |

### General experimental procedure

$^1\text{H}$ - and  $^{13}\text{C}$ -NMR spectra were recorded on Varian 600 MHz spectrometers in  $\text{CDCl}_3$  (with tetramethylsilane) solutions and chemical shifts ( $\delta$ , ppm) were determined with internal solvent signal as reference (7.26 for  $^1\text{H}$  NMR and 77.0 for  $^{13}\text{C}$  NMR). Flash column chromatography was performed on Silica Gel (300-400 mesh) with an appropriate solvent system (see details below).

### Decarboxylation of product **3n** to 7-hydroxyflavone **4**<sup>1</sup>

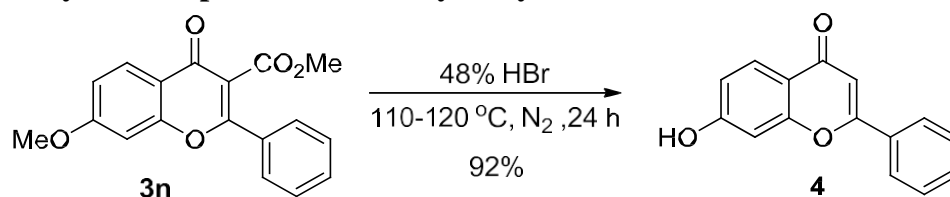

A mixture of methyl 7-methoxyflavone-3-carboxylate (**3n**, 0.20 mmol) and 48% aqueous hydrobromic acid (3.0 mL) was heated at 110-120 °C under nitrogen atmosphere for 24 h. After completion of the reaction, the excess hydrobromic acid was distilled off under reduced pressure, and the residue was purified by silica gel column with petroleum ether/ethyl acetate (10:1) as the eluent to give the analytically pure 7-hydroxyflavone (**4**)<sup>2</sup> as a white solid in 92% yield.  $^1\text{H}$  NMR ( $\text{DMSO}-d_6$ , 600 MHz, ppm)  $\delta$  10.82 (s, br, 1 H), 8.04 (dd,  $J = 8.22, 1.38$  Hz, 2 H), 7.89 (d,  $J = 8.64$  Hz, 1 H), 7.59-7.53 (m, 3 H), 7.00 (d,  $J = 2.22$  Hz, 1 H), 6.93 (dd,  $J = 8.67, 2.28$  Hz, 1 H), 6.88 (s, 1 H).  $^{13}\text{C}$  NMR ( $\text{DMSO}-d_6$ , 150 MHz, ppm)  $\delta$  176.8, 163.2, 162.4, 157.9, 131.9, 131.7, 129.5, 127.0, 126.6, 116.6, 115.5, 107.1, 103.0. And the spectra data are in accordance with literature.<sup>1</sup>

### General procedure for the syntheses of methyl arylpropiolates<sup>3</sup>

To a solution of aryl iodide (2.0 mmol) and methyl propiolate (672.6 mg, 8.0 mmol) in anhydrous THF (6.0 mL) were added  $\text{PdCl}_2(\text{PPh}_3)_2$  (28.1 mg, 2 mol%), CuI (15.3 mg, 4 mol%), and anhydrous  $\text{K}_2\text{CO}_3$  (1.104 g, 8.0 mmol) under  $\text{N}_2$  atmosphere. The obtained mixture was stirred at 65 °C for 10 h. Then THF was evaporated under vacuum and the residue was extracted with EtOAc. After concentration, the crude product was purified by silica gel column chromatography with petroleum

ether/EtOAc (15:1 to 12:1) as the eluent to give the analytically pure methyl arylpropiolate. Methyl arylpropiolates **2p-r** were obtained according to the above procedures in 70-85% isolated yields.

#### Synthesis of ethyl dimethyl (*E*)-2-(2-formylphenoxy)-2-butenedioate (**5a**)<sup>4</sup>

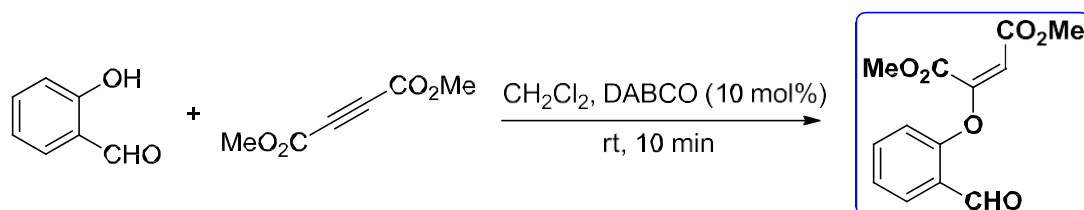

Dimethyl 2-butynedioate (284.2 mg, 2.0 mmol), DABCO (22.4 mg, 0.2 mmol), and salicylaldehyde (244.3 mg, 2.0 mmol) were stirred in CH<sub>2</sub>Cl<sub>2</sub> (16 mL) at room temperature for 10 min. The solvent was evaporated under vacuum and the residue was purified by silica gel column chromatography with petroleum ether/EtOAc (5:1) as the eluent to give 81% total yield (428.1 mg) of the vinyl ethers, with *E*-isomer **5a** as the major product, and *Z*-isomer **5b** as the minor product (*E/Z* 91:9). <sup>1</sup>H NMR (CDCl<sub>3</sub>, 600 MHz, ppm) δ 10.53 (s, 0.08 H; *Z*-isomer) 10.27 (s, 1 H; *E*-isomer), 7.96 (dd, *J* = 7.80, 1.62 Hz, 1 H; *E*-isomer), 7.91 (dd, *J* = 7.74, 1.62 Hz, 0.09 H; *Z*-isomer), 7.66 (td, *J* = 7.80, 1.74 Hz, 1 H; *E*-isomer), 7.48 (td, *J* = 7.80, 1.74 Hz, 0.11 H; *Z*-isomer), 7.39 (t, *J* = 7.59 Hz, 1 H; *E*-isomer), 7.19 (d, *J* = 8.22 Hz, 1 H; *E*-isomer), 7.17 (d, *J* = 7.38 Hz, 0.09 H; *Z*-isomer), 6.82 (d, *J* = 8.28 Hz, 0.10 H; *Z*-isomer), 6.74 (s, 0.08 H; *Z*-isomer), 5.23 (s, 1 H; *E*-isomer), 3.91 (s, 3 H; *E*-isomer), 3.76 (s, 0.26 H; *Z*-isomer), 3.70 (s, 0.27 H; *Z*-isomer), 3.68 (s, 3 H; *E*-isomer).

#### Synthesis of ethyl dimethyl (*Z*)-2-(2-formylphenoxy)-2-butenedioate (**5b**)<sup>5</sup>

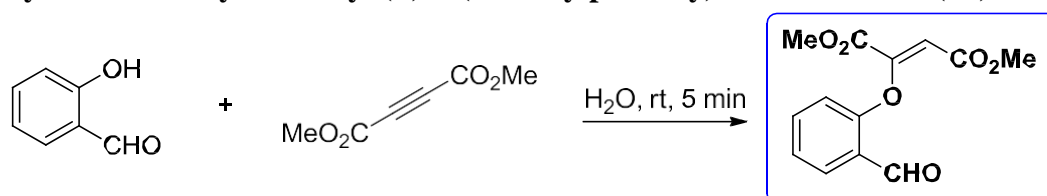

Salicylaldehyde (244.3 mg, 2.0 mmol) was dissolved in aqueous solution of K<sub>2</sub>CO<sub>3</sub> (0.276 g, 2.0 mmol), and then dimethyl 2-butynedioate (284.2 mg, 2.0 mmol) was added to the resulting solution. The reaction mixture was stirred vigorously at room

temperature for 5 min., and was extracted with EtOAc (20 mL × 3). After concentration, the crude product was purified by silica gel column chromatography with petroleum ether/EtOAc (5:1) as the eluent to give 67% total yield (354.1 mg) of vinyl ethers, with *Z*-isomer **5b** as the major product, and *E*-isomer **5a** as the minor product (*E/Z* 4:96). <sup>1</sup>H NMR (CDCl<sub>3</sub>, 600 MHz, ppm) δ 10.54 (s, 1 H; *Z*-isomer), 10.28 (s, 0.03 H; *E*-isomer), 7.96 (dd, *J* = 7.74, 1.68 Hz, 0.04 H; *E*-isomer), 7.91 (dd, *J* = 7.74, 1.74 Hz, 1 H; *Z*-isomer), 7.66 (td, *J* = 7.80, 1.74 Hz, 0.05 H; *E*-isomer), 7.49 (td, *J* = 7.82, 1.80 Hz, 1 H; *Z*-isomer), 7.40 (t, *J* = 7.56 Hz, 0.05 H; *E*-isomer), 7.18 (t, *J* = 7.53 Hz, 1 H; *Z*-isomer), 6.83 (dd, *J* = 8.22, 0.36 Hz, 1 H; *Z*-isomer), 6.74 (s, 1 H; *Z*-isomer), 5.23 (s, 0.04 H), 3.92 (s, 0.09 H; *E*-isomer), 3.76 (s, 3 H; *Z*-isomer), 3.71 (s, 3 H; *Z*-isomer), 3.69 (s, 0.13 H; *E*-isomer).

### General procedure for the synthesis of chromones

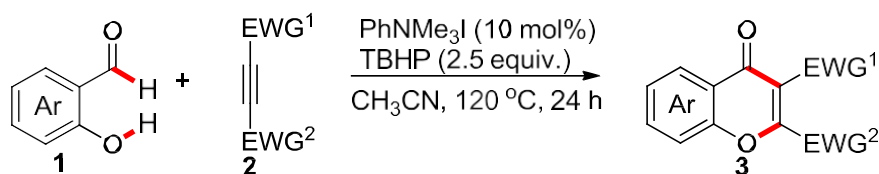

To an oven-dried reaction vessel was charged with trimethylphenylammonium iodide (5.3 mg, 0.02 mmol, 10 mol%), salicylaldehydes (0.20 mmol, 1.0 equiv.), anhydrous acetonitrile (2.0 mL), alkynes (0.30 mmol, 1.5 equiv.), and *tert*-butyl hydroperoxide (90  $\mu$ L, 5.0-6.0 M in decane, 2.5 equiv.) sequentially. Then the flask was sealed directly, placed into an oil bath, and stirred at 120 °C. After 24 h, the resulting mixture was cooled to room temperature, filtered through a short silica gel pad, and washed with ethyl acetate. After concentrated under vacuum, the residue was purified by silica gel column with petroleum ether/ethyl acetate as the eluent to give the analytically pure chromones.

### The spectroscopic data of chromones

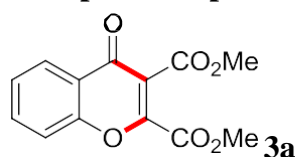

**Dimethyl chromone-2,3-dicarboxylate (3a).**<sup>6</sup> Pale yellow solid. Isolated yield 71% (37.6 mg, from 24.5 mg of **1a**), eluent: petroleum ether/EtOAc 6:1. <sup>1</sup>H NMR (CDCl<sub>3</sub>, 600 MHz, ppm) δ 8.21 (d, *J* = 7.98 Hz, 1 H), 7.77 (t, *J* = 7.83 Hz, 1 H), 7.58 (d, *J* = 8.52 Hz, 1 H), 7.47 (t, *J* = 7.53 Hz, 1 H), 4.00 (s, 3 H), 3.96 (s, 3 H). <sup>13</sup>C NMR (CDCl<sub>3</sub>, 150 MHz, ppm) δ 174.9, 163.7, 160.2, 155.1, 149.5, 135.3, 126.4, 126.1, 123.6, 122.4, 118.6, 53.9, 53.2. HR-ESI-MS: [M+Na]<sup>+</sup> *m/z* calcd. for C<sub>13</sub>H<sub>10</sub>O<sub>6</sub>Na: 285.0375; found 285.0374.

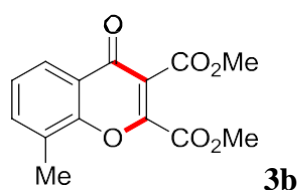

**Dimethyl 8-methylchromone-2,3-dicarboxylate (3b).** Pale yellow solid. Isolated yield 63% (35.5 mg, from 27.8 mg of **1b**), eluent: petroleum ether/EtOAc 6:1. <sup>1</sup>H NMR (CDCl<sub>3</sub>, 600 MHz, ppm) δ 8.01 (d, *J* = 7.92 Hz, 1 H), 7.57 (d, *J* = 7.26 Hz, 1 H), 7.33 (t, *J* = 7.65 Hz, 1 H), 4.00 (s, 3 H), 3.95 (s, 3 H), 2.51 (s, 3 H). <sup>13</sup>C NMR (CDCl<sub>3</sub>, 150 MHz, ppm) δ 175.2, 163.7, 160.3, 153.6, 149.2, 136.1, 128.2, 125.9, 123.53, 123.47, 122.0, 53.8, 53.1, 15.3. HR-ESI-MS: [M+H]<sup>+</sup> *m/z* calcd. for C<sub>14</sub>H<sub>13</sub>O<sub>6</sub>: 277.0712; found 277.0710.

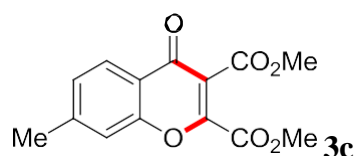

**Dimethyl 7-methylchromone-2,3-dicarboxylate (3c).** Pale yellow solid. Isolated yield 73% (40.9 mg, from 27.6 mg of **1c**), eluent: petroleum ether/EtOAc 6:1. <sup>1</sup>H NMR (CDCl<sub>3</sub>, 600 MHz, ppm) δ 8.09 (d, *J* = 8.16 Hz, 1 H), 7.38 (s, 1 H), 7.28 (dd, *J* = 8.16, 0.84 Hz, 1 H), 4.00 (s, 3 H), 3.96 (s, 3 H), 2.51 (s, 3 H). <sup>13</sup>C NMR (CDCl<sub>3</sub>, 150 MHz, ppm) δ 174.7, 163.8, 160.3, 155.3, 149.1, 147.0, 128.0, 125.8, 122.4, 121.4, 118.2, 53.8, 53.1, 21.9. HR-ESI-MS: [M+Na]<sup>+</sup> *m/z* calcd. for C<sub>14</sub>H<sub>12</sub>O<sub>6</sub>Na: 299.0532; found 299.0527.

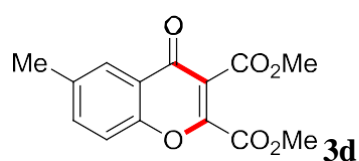

**Dimethyl 6-methylchromone-2,3-dicarboxylate (3d).** Pale yellow solid. Isolated yield 75% (41.9 mg, from 27.5 mg of **1d**), eluent: petroleum ether/EtOAc 6:1.  $^1\text{H}$  NMR ( $\text{CDCl}_3$ , 600 MHz, ppm)  $\delta$  7.96 (s, 1 H), 7.56 (dd,  $J = 8.61, 2.04$  Hz, 1 H), 7.46 (d,  $J = 8.64$  Hz, 1 H), 3.99 (s, 3 H), 3.95 (s, 3 H), 2.45 (s, 3 H).  $^{13}\text{C}$  NMR ( $\text{CDCl}_3$ , 150 MHz, ppm)  $\delta$  174.9, 163.8, 160.3, 153.4, 149.2, 136.7, 136.5, 125.2, 123.3, 122.2, 118.3, 53.8, 53.1, 20.9. HR-ESI-MS:  $[\text{M}+\text{H}]^+$   $m/z$  calcd. for  $\text{C}_{14}\text{H}_{13}\text{O}_6$ : 277.0712; found 277.0709.

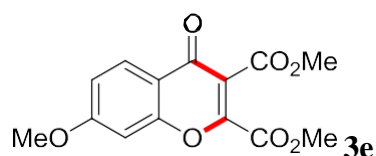

**Dimethyl 7-methoxychromone-2,3-dicarboxylate (3e).** Pale yellow solid. Isolated yield 80% (47.1 mg, from 30.7 mg of **1e**), eluent: petroleum ether/EtOAc 40:1.  $^1\text{H}$  NMR ( $\text{CDCl}_3$ , 400 MHz, ppm)  $\delta$  8.08 (d,  $J = 8.94$  Hz, 1 H), 7.00 (dd,  $J = 8.91, 2.40$  Hz, 1 H), 6.93 (d,  $J = 2.34$  Hz, 1 H), 3.98 (s, 3 H), 3.94 (s, 3 H), 3.90 (s, 3 H).  $^{13}\text{C}$  NMR ( $\text{CDCl}_3$ , 100 MHz, ppm)  $\delta$  173.9, 165.3, 163.8, 160.2, 157.0, 148.8, 127.3, 122.7, 117.4, 116.1, 100.4, 56.0, 53.8, 53.1. HR-ESI-MS:  $[\text{M}+\text{H}]^+$   $m/z$  calcd. for  $\text{C}_{14}\text{H}_{13}\text{O}_7$ : 293.0661; found 293.0658.

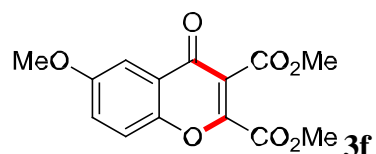

**Dimethyl-6-methoxychromone-2,3-dicarboxylate (3f).** Pale yellow solid. Isolated yield 78% (45.4 mg, from 30.2 mg of **1f**), eluent: petroleum ether/EtOAc 5:1.  $^1\text{H}$  NMR ( $\text{CDCl}_3$ , 600 MHz, ppm)  $\delta$  7.51-7.49 (m, 2 H), 7.33 (dt,  $J = 9.24, 2.61$  Hz, 1 H), 3.98 (s, 3 H), 3.95 (s, 3 H), 3.88 (s, 3 H).  $^{13}\text{C}$  NMR ( $\text{CDCl}_3$ , 150 MHz, ppm)  $\delta$  174.7, 163.9, 160.3, 157.8, 149.9, 149.0, 125.4, 124.4, 121.5, 120.0, 104.9, 56.0, 53.8, 53.1. HR-ESI-MS:  $[\text{M}+\text{Na}]^+$   $m/z$  calcd. for  $\text{C}_{14}\text{H}_{12}\text{O}_7\text{Na}$ : 315.0481; found 315.0478.

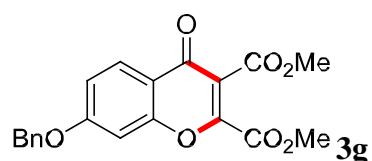

**Dimethyl 7-benzyloxychromone-2,3-dicarboxylate (3g).**<sup>7</sup> White solid. Isolated yield 63% (46.4 mg, from 45.5 mg of **1g**), eluent: petroleum ether/EtOAc 8:1.  $^1\text{H}$  NMR

(CDCl<sub>3</sub>, 600 MHz, ppm)  $\delta$  8.12 (dd,  $J = 8.94, 1.92$  Hz, 1 H), 7.44-7.40 (m, 4 H), 7.39-7.36 (m, 1 H), 7.11-7.09 (m, 1 H), 7.03 (d,  $J = 2.22$  Hz, 1 H), 5.17 (s, 2 H), 3.99 (s, 3 H), 3.96 (s, 3 H). <sup>13</sup>C NMR (CDCl<sub>3</sub>, 150 MHz, ppm)  $\delta$  174.0, 164.3, 163.8, 160.2, 157.0, 148.9, 135.2, 128.8, 128.5, 127.51, 127.49, 122.7, 117.7, 116.6, 101.5, 70.8, 53.8, 53.1. HR-ESI-MS: [M+H]<sup>+</sup>  $m/z$  calcd. for C<sub>20</sub>H<sub>17</sub>O<sub>7</sub>: 369.0974; found 369.0974.

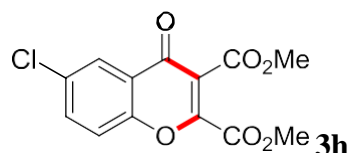

**Dimethyl 6-chlorochromone-2,3-dicarboxylate (3h).** White solid. Isolated yield 52% (30.8 mg, from 31.2 mg of **1h**), eluent: petroleum ether/EtOAc 6:1. <sup>1</sup>H NMR (CDCl<sub>3</sub>, 600 MHz, ppm)  $\delta$  8.17 (d,  $J = 2.58$  Hz, 1 H), 7.71 (dd,  $J = 8.97, 2.64$  Hz, 1 H), 7.55 (d,  $J = 8.94$  Hz, 1 H), 4.01 (s, 3 H), 3.97 (s, 3 H). <sup>13</sup>C NMR (CDCl<sub>3</sub>, 150 MHz, ppm)  $\delta$  173.8, 163.3, 159.9, 153.4, 149.6, 135.5, 132.6, 125.4, 124.5, 122.3, 120.3, 54.0, 53.3. HR-ESI-MS: [M+Na]<sup>+</sup>  $m/z$  calcd. for C<sub>13</sub>H<sub>9</sub>ClO<sub>6</sub>Na: 318.9985; found 318.9984.

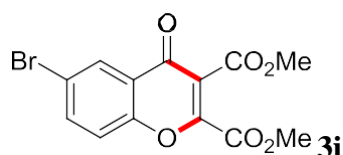

**Dimethyl 6-bromochromone-2,3-dicarboxylate (3i).** White solid. Isolated yield 57% (38.9 mg, from 40.2 mg of **1i**), eluent: petroleum ether/EtOAc 5:1. <sup>1</sup>H NMR (CDCl<sub>3</sub>, 600 MHz, ppm)  $\delta$  8.33 (d,  $J = 2.40$  Hz, 1 H), 7.85 (dd,  $J = 8.91, 2.46$  Hz, 1 H), 7.49 (d,  $J = 8.94$  Hz, 1 H), 4.00 (s, 3 H), 3.97 (s, 3 H). <sup>13</sup>C NMR (CDCl<sub>3</sub>, 150 MHz, ppm)  $\delta$  173.6, 163.3, 159.9, 153.9, 149.6, 138.3, 128.6, 124.8, 122.4, 120.5, 120.1, 54.0, 53.3. HR-ESI-MS: [M+Na]<sup>+</sup>  $m/z$  calcd. for C<sub>13</sub>H<sub>9</sub>BrO<sub>6</sub>Na: 362.9480, 364.9460; found 362.9476, 364.9459.

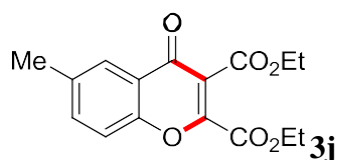

**Diethyl 6-methylchromone-2,3-dicarboxylate (3j).** Pale yellow solid. Isolated yield 69% (42.4 mg, from 27.4 mg of **1d**), eluent: petroleum ether/EtOAc 6:1. <sup>1</sup>H NMR (CDCl<sub>3</sub>, 600 MHz, ppm)  $\delta$  7.92 (s, 1 H), 7.52 (dd,  $J = 8.49, 2.16$  Hz, 1 H), 7.44 (td,  $J = 8.64, 2.76$  Hz, 1 H), 4.43-4.39 (m, 4 H), 2.42 (s, 3 H), 1.40-1.35 (m, 6 H). <sup>13</sup>C NMR



(CDCl<sub>3</sub>, 150 MHz, ppm)  $\delta$  175.1, 163.4, 159.8, 153.4, 149.3, 136.5, 136.4, 125.1, 123.3, 122.3, 118.3, 63.3, 62.2, 20.9, 14.0, 13.9. HR-ESI-MS: [M+H]<sup>+</sup>  $m/z$  calcd. for C<sub>16</sub>H<sub>17</sub>O<sub>6</sub>: 305.1025; found 305.1023.

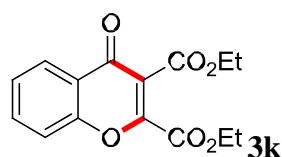

**Diethyl chromone-2,3-dicarboxylate (3k).** White solid. Isolated yield 65% (38.2 mg, from 24.6 mg of **1a**), eluent: petroleum ether/EtOAc 6:1. <sup>1</sup>H NMR (CDCl<sub>3</sub>, 600 MHz, ppm)  $\delta$  8.19-8.18 (m, 1 H), 7.76-7.73 (m, 1 H), 7.57 (d,  $J$  = 8.04 Hz, 1 H), 7.45 (td,  $J$  = 7.56, 0.96 Hz, 1 H), 4.45-4.41 (m, 4 H), 1.40-1.38 (m, 6 H). <sup>13</sup>C NMR (CDCl<sub>3</sub>, 150 MHz, ppm)  $\delta$  175.1, 163.2, 159.7, 155.2, 149.5, 135.2, 126.3, 126.0, 123.6, 122.5, 118.6, 63.4, 62.3, 14.0, 13.9. HR-ESI-MS: [M+Na]<sup>+</sup>  $m/z$  calcd. for C<sub>15</sub>H<sub>14</sub>O<sub>6</sub>Na: 313.0688; found 313.0688.

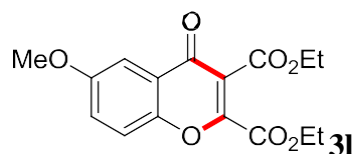

**Diethyl 6-methoxychromone-2,3-dicarboxylate (3l).** Very viscous yellow oil. Isolated yield 69% (44.3 mg, from 30.5 mg of **1f**), eluent: petroleum ether/EtOAc 6:1. <sup>1</sup>H NMR (CDCl<sub>3</sub>, 600 MHz, ppm)  $\delta$  7.50-7.48 (m, 2 H), 7.32-7.29 (m, 1 H), 4.43-4.00 (m, 4 H), 1.40-1.35 (m, 6 H). <sup>13</sup>C NMR (CDCl<sub>3</sub>, 150 MHz, ppm)  $\delta$  174.9, 163.4, 159.7, 157.7, 150.0, 149.1, 125.3, 124.4, 121.6, 120.1, 104.8, 63.3, 62.2, 55.9, 14.0, 13.9. HR-ESI-MS: [M+H]<sup>+</sup>  $m/z$  calcd. for C<sub>16</sub>H<sub>17</sub>O<sub>7</sub>: 321.0974; found 321.0971.

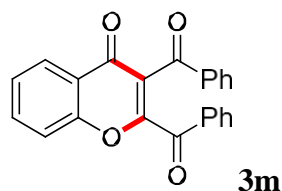

**(4-Oxo-4H-chromene-2,3-diyl)bis(phenylmethanone) (3m).**<sup>8</sup> White solid. Isolated yield 70% (52.0 mg, from 25.6 mg of **1a**), eluent: petroleum ether/EtOAc 5:1. <sup>1</sup>H NMR (CDCl<sub>3</sub>, 600 MHz, ppm)  $\delta$  8.27 (d,  $J$  = 7.92 Hz, 1 H), 7.95 (d,  $J$  = 7.44 Hz, 2 H), 7.89 (dd,  $J$  = 8.22, 1.02 Hz, 2 H), 7.79 (td,  $J$  = 7.82, 1.32 Hz, 1 H), 7.65 (t,  $J$  = 7.44 Hz, 1 H), 7.58-7.49 (m, 5 H), 7.44 (t,  $J$  = 7.77 Hz, 2 H). <sup>13</sup>C NMR (CDCl<sub>3</sub>, 150 MHz,

ppm)  $\delta$  191.6, 187.3, 175.9, 158.5, 155.1, 136.8, 135.1, 134.7, 134.2, 133.7, 130.1, 129.2, 128.8, 128.6, 126.5, 126.3, 126.0, 124.2, 118.5. HR-ESI-MS:  $[M+H]^+$   $m/z$  calcd. for  $C_{23}H_{15}O_4$ : 355.0970; found 355.0967.

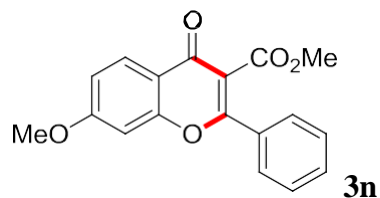

**Methyl 7-methoxy-flavone-3-carboxylate (3n).** Pale yellow solid. Isolated yield 47% (29.4 mg, from 30.5 mg of **1e**), eluent: petroleum ether/EtOAc 8:1.  $^1H$  NMR ( $CDCl_3$ , 600 MHz, ppm)  $\delta$  8.16 (d,  $J = 8.94$  Hz, 1 H), 7.72 (dd,  $J = 7.92, 1.44$  Hz, 2 H), 7.55 (td,  $J = 7.38, 2.28$  Hz, 1 H), 7.50 (td,  $J = 7.41, 1.44$  Hz, 2 H), 7.01 (dd,  $J = 8.91, 2.40$  Hz, 1 H), 6.91 (d,  $J = 2.34$  Hz, 1 H), 3.92 (s, 3 H), 3.79 (s, 3 H).  $^{13}C$  NMR ( $CDCl_3$ , 150 MHz, ppm)  $\delta$  174.3, 165.7, 164.6, 162.6, 157.6, 132.0, 131.5, 128.8, 127.9, 127.5, 118.0, 116.9, 115.0, 100.3, 55.9, 52.7. HR-ESI-MS:  $[M+H]^+$   $m/z$  calcd. for  $C_{18}H_{15}O_5$ : 311.0919; found 311.0917.

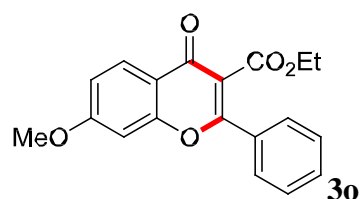

**Ethyl 7-methoxy-flavone-3-carboxylate (3o).** Very viscous yellow oil. Isolated yield 49% (32.4 mg, from 30.9 mg of **1e**), eluent: petroleum ether/EtOAc 8:1.  $^1H$  NMR ( $CDCl_3$ , 600 MHz, ppm)  $\delta$  8.16 (d,  $J = 8.88$  Hz, 1 H), 7.74 (d,  $J = 7.32$  Hz, 2 H), 7.54 (t,  $J = 7.38$  Hz, 1 H), 7.49 (t,  $J = 7.50$  Hz, 2 H), 7.00 (dd,  $J = 8.88, 2.28$  Hz, 1 H), 6.91 (d,  $J = 2.28$  Hz, 1 H), 4.26 (q,  $J = 7.14$  Hz, 2 H), 3.92 (s, 3 H), 1.16 (t,  $J = 7.14$  Hz, 3 H).  $^{13}C$  NMR ( $CDCl_3$ , 150 MHz, ppm)  $\delta$  174.3, 165.1, 164.5, 162.6, 157.6, 132.0, 131.4, 128.7, 128.0, 127.5, 118.3, 117.0, 114.9, 100.3, 61.8, 55.9, 13.8. HR-ESI-MS:  $[M+Na]^+$   $m/z$  calcd. for  $C_{19}H_{16}O_5Na$ : 347.0895; found 347.0890.

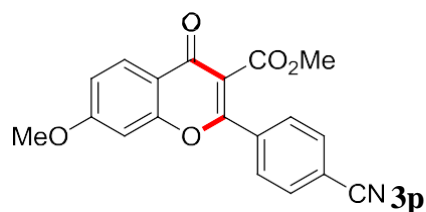

**Methyl 4'-cyano-7-methoxy-flavone-3-carboxylate (3p).** White solid. Isolated yield 55% (36.7 mg, from 30.3 mg of **1e**), eluent: petroleum ether/EtOAc 3:1.  $^1\text{H}$  NMR ( $\text{CDCl}_3$ , 600 MHz, ppm)  $\delta$  8.15 (d,  $J = 8.94$  Hz, 1 H), 7.84 (d,  $J = 8.46$  Hz, 2 H), 7.79 (d,  $J = 8.46$  Hz, 2 H), 7.03 (dd,  $J = 8.94, 2.34$  Hz, 1 H), 6.91 (d,  $J = 2.28$  Hz, 1 H), 3.92 (s, 3 H), 3.80 (s, 3 H).  $^{13}\text{C}$  NMR ( $\text{CDCl}_3$ , 150 MHz, ppm)  $\delta$  173.8, 165.1, 164.9, 160.2, 157.5, 136.1, 132.5, 128.7, 127.6, 119.0, 117.7, 116.8, 115.4, 115.1, 100.3, 56.0, 53.0. HR-ESI-MS:  $[\text{M}+\text{H}]^+$   $m/z$  calcd. for  $\text{C}_{19}\text{H}_{14}\text{NO}_5$ : 336.0872; found 336.0869.

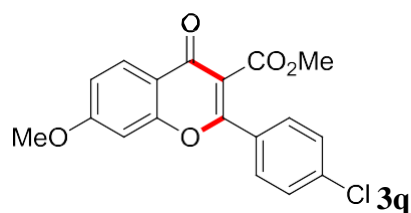

**Methyl 4'-chloro-7-methoxy-flavone-3-carboxylate (3q).** Pale yellow solid. Isolated yield 47% (32.8 mg, from 30.7 mg of **1e**), eluent: petroleum ether/EtOAc 7:1.  $^1\text{H}$  NMR ( $\text{CDCl}_3$ , 600 MHz, ppm)  $\delta$  8.14 (d,  $J = 8.88$  Hz, 1 H), 7.67 (d,  $J = 8.58$  Hz, 2 H), 7.48 (d,  $J = 8.52$  Hz, 2 H), 7.01 (dd,  $J = 8.91, 2.34$  Hz, 1 H), 6.90 (d,  $J = 2.28$  Hz, 1 H), 3.92 (s, 3 H), 3.80 (s, 3 H).  $^{13}\text{C}$  NMR ( $\text{CDCl}_3$ , 150 MHz, ppm)  $\delta$  174.1, 165.5, 164.7, 161.3, 157.5, 137.9, 130.3, 129.3, 129.1, 127.5, 118.1, 116.8, 115.1, 100.3, 55.9, 52.9. HR-ESI-MS:  $[\text{M}+\text{H}]^+$   $m/z$  calcd. for  $\text{C}_{18}\text{H}_{14}\text{ClO}_5$ : 345.0530; found 345.0528.

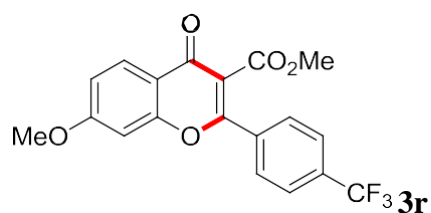

**Methyl 4'-trifluoromethyl-7-methoxy-flavone-3-carboxylate (3r).** Yellow solid. Isolated yield 51% (38.9 mg, from 30.6 mg of **1e**), eluent: petroleum ether/EtOAc 7:1.  $^1\text{H}$  NMR ( $\text{CDCl}_3$ , 600 MHz, ppm)  $\delta$  8.15 (d,  $J = 8.94$  Hz, 1 H), 7.85 (d,  $J = 8.22$  Hz, 2 H), 7.76 (d,  $J = 8.28$  Hz, 2 H), 7.02 (dd,  $J = 8.91, 2.28$  Hz, 1 H), 6.91 (d,  $J = 2.28$  Hz, 1 H), 3.92 (s, 3 H), 3.80 (s, 3 H).  $^{13}\text{C}$  NMR ( $\text{CDCl}_3$ , 150 MHz, ppm)  $\delta$  174.0, 165.3, 164.8, 160.8, 157.5, 135.3, 133.1 (q,  $J_{\text{C-F}} = 32.8$  Hz), 128.4, 127.6, 125.8 (q,  $J_{\text{C-F}} = 3.7$  Hz), 123.5 (q,  $J_{\text{C-F}} = 301.6$  Hz), 118.7, 116.8, 115.3, 100.3, 55.9, 52.9.  $^{19}\text{F}$  NMR

(CDCl<sub>3</sub>, 564.6 MHz, ppm)  $\delta$  -63.1. HR-ESI-MS: [M+Na]<sup>+</sup> *m/z* calcd. for C<sub>19</sub>H<sub>13</sub>F<sub>3</sub>O<sub>5</sub>Na: 401.0613; found 401.0607.

## Reference

1. M. Cushman, D. Nagarathnam, D. L. Burg, R. L. Geahlen, *J. Med. Chem.* **1991**, *34*, 798.
2. L. W. McGarry, M. R. Detty, *J. Org. Chem.* **1990**, *55*, 4349.
3. T. Echert, J. Ipaktschi, *Synth. Commun.* **1998**, *28*, 327.
4. M.-J. Fan, G.-Q. Li, L.-H. Li, S.-D. Yang, Y.-M. Liang, *Synthesis* **2006**, 2286.
5. Y. K. Sarrafi, M. Sadatshahabi, K. Alimohammadi, M. Tajbakhsh, *Green Chem.* **2011**, *13*, 2851.
6. R. K. Gupta, M. V. George, *Tetrahedron* **1975**, *31*, 1263.
7. G. Gaviraghi, G. Pifferi, *Ger. Offen.* **1977**, DE2718041.
8. D. Ramaish, P. M. Scaria, D. R. Cyr, P. K. Das, M. V. George, *J. Org. Chem.* **1988**, *53*, 2016.

Copy of the  $^1\text{H}$  and  $^{13}\text{C}$  NMR spectra of 7-hydroxyflavone (4) (via decarboxylation and demethylation of compound 3n)

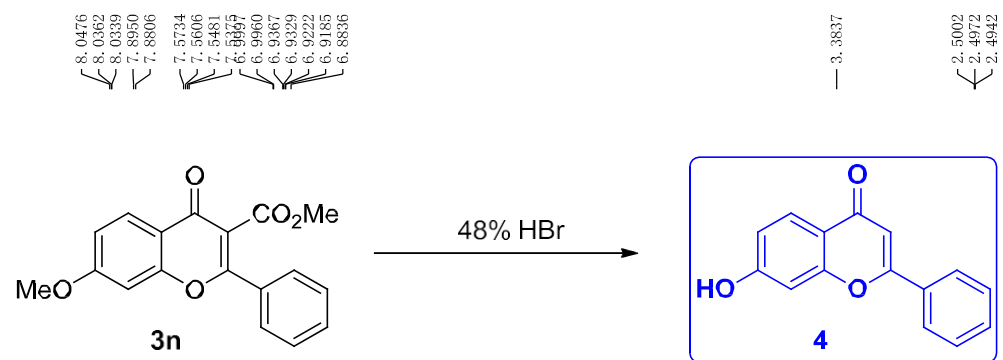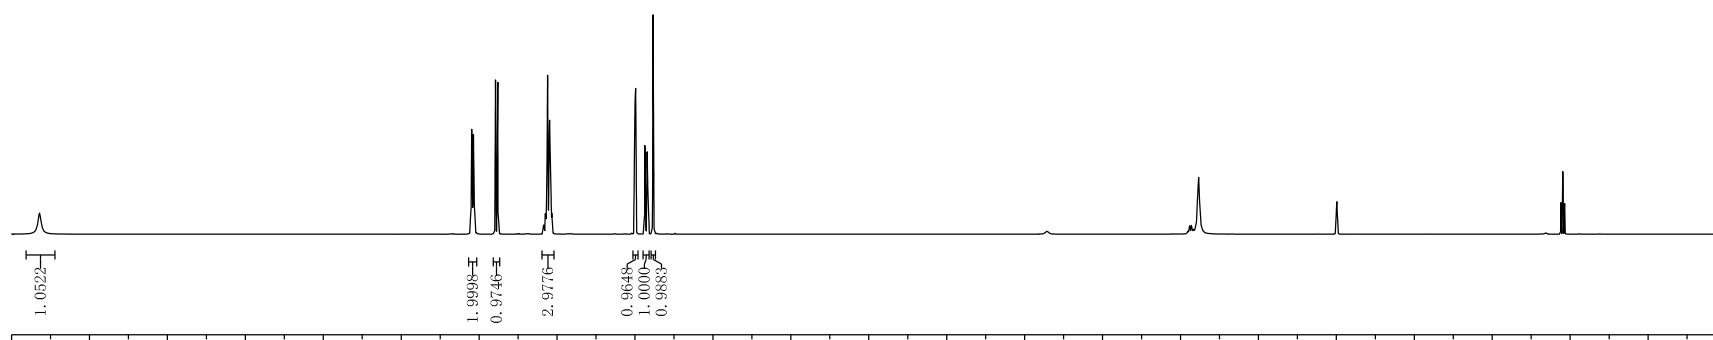

11.0 10.5 10.0 9.5 9.0 8.5 8.0 7.5 7.0 6.5 6.0 5.5 5.0 4.5 4.0 3.5 3.0 2.5 2.0 1.5 1.0 0.5 0  
f1 (ppm)

— 176.8117

163.2045  
162.3508  
— 157.9285

131.9336  
131.7371  
129.4823  
126.9660  
126.5832

116.6020  
115.4938

107.0687  
— 102.9881

40.3591  
40.2202  
40.0806  
39.9416  
39.8018  
39.6629  
39.5216

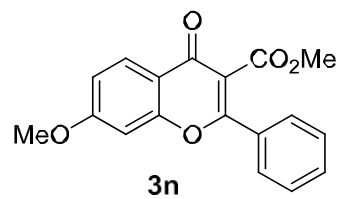

48% HBr

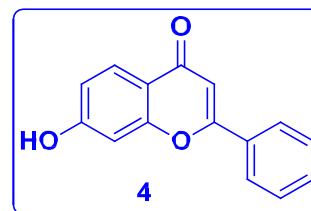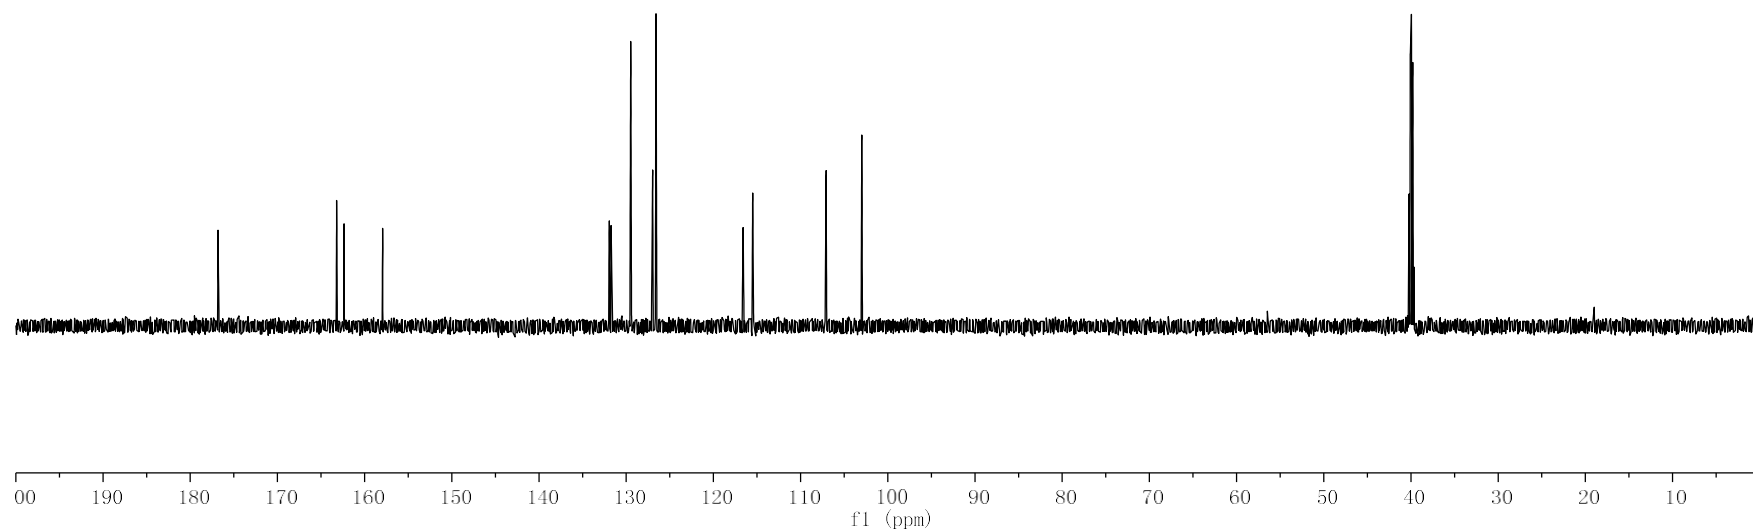

Copy of the  $^1\text{H}$  NMR spectra of (*E*)-2-(2-formylphenoxy)-2-butenedioate (5a)

10.5330  
10.2745

7.9653  
7.9626  
7.9523  
7.9496  
7.9128  
7.9101  
7.8999  
7.8972  
7.6567  
7.6556  
7.6540  
7.4055  
7.3929  
7.2014  
6.8866  
6.8148  
6.7372

5.2266

3.9130  
3.7593  
3.7021  
3.6835

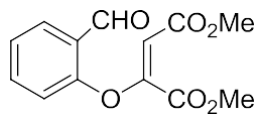

5a, with trace amount of 5b  
5a/5b 91:9

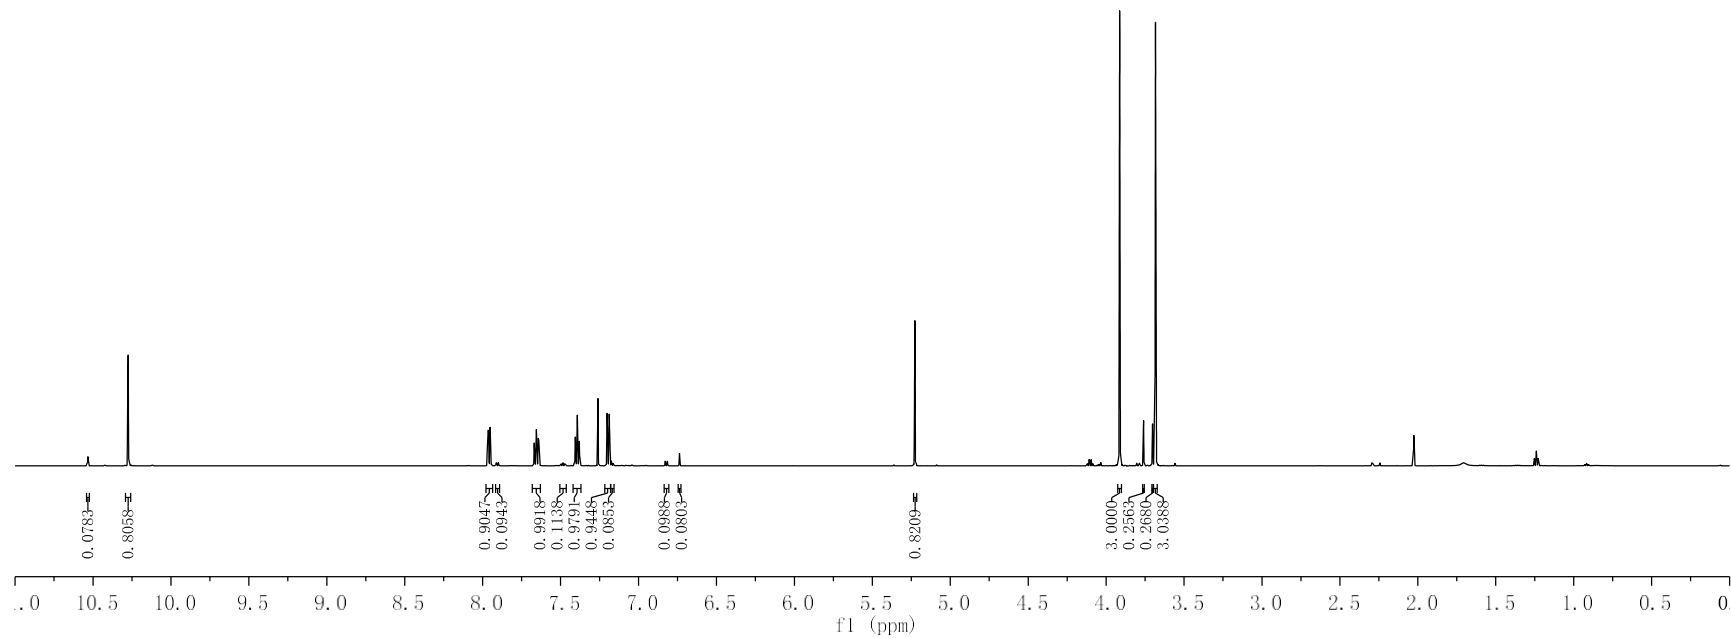



Copy of the <sup>1</sup>H NMR spectra of (Z)-2-(2-formylphenoxy)-2-butenedioate (5b)

10.5410  
10.2822

7.9719  
7.9691  
7.9590  
7.9562  
7.9205  
7.9176  
7.9076  
7.9047  
7.4913  
7.4896  
7.4885  
7.4869  
7.2598  
7.1926  
7.1860  
6.8335  
6.8329  
6.8198  
6.7443

5.2324

3.9181  
3.7635  
3.7077  
3.6891

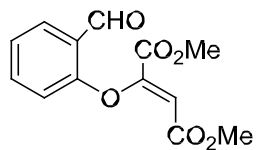

5b, with trace amount of 5a  
5a/5b 4:96

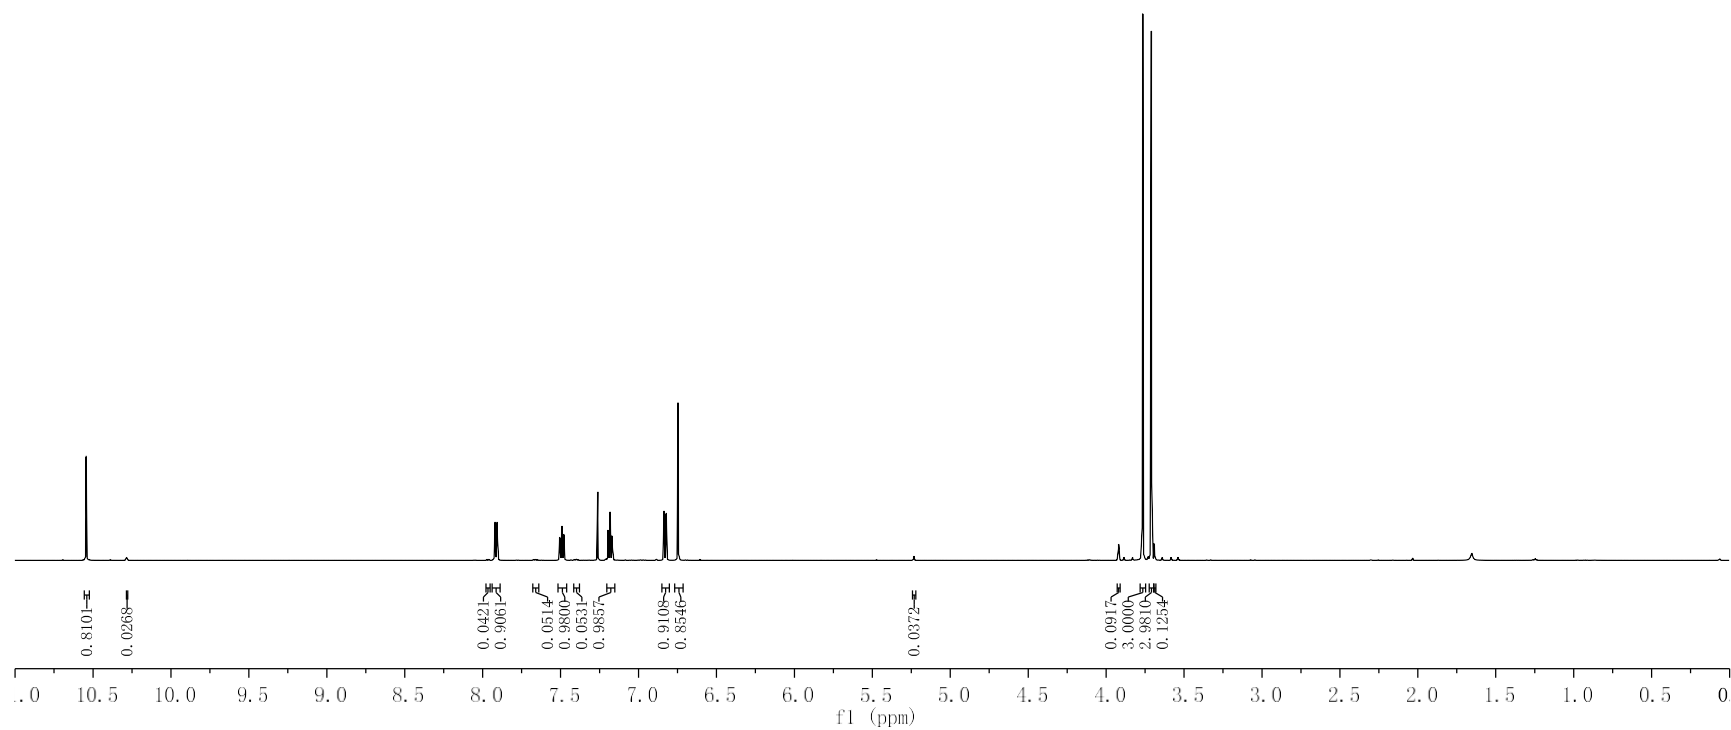

# Copies of the $^1\text{H}$ , $^{13}\text{C}$ and $^{19}\text{F}$ NMR spectra of chromones 3a-r

8.2143  
8.2010  
7.7795  
7.7653  
7.7534  
7.5835  
7.5693  
7.4837  
7.4709  
7.4586  
7.2597

4.0019  
3.9617

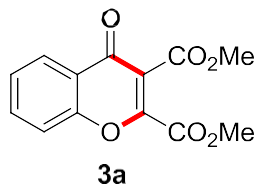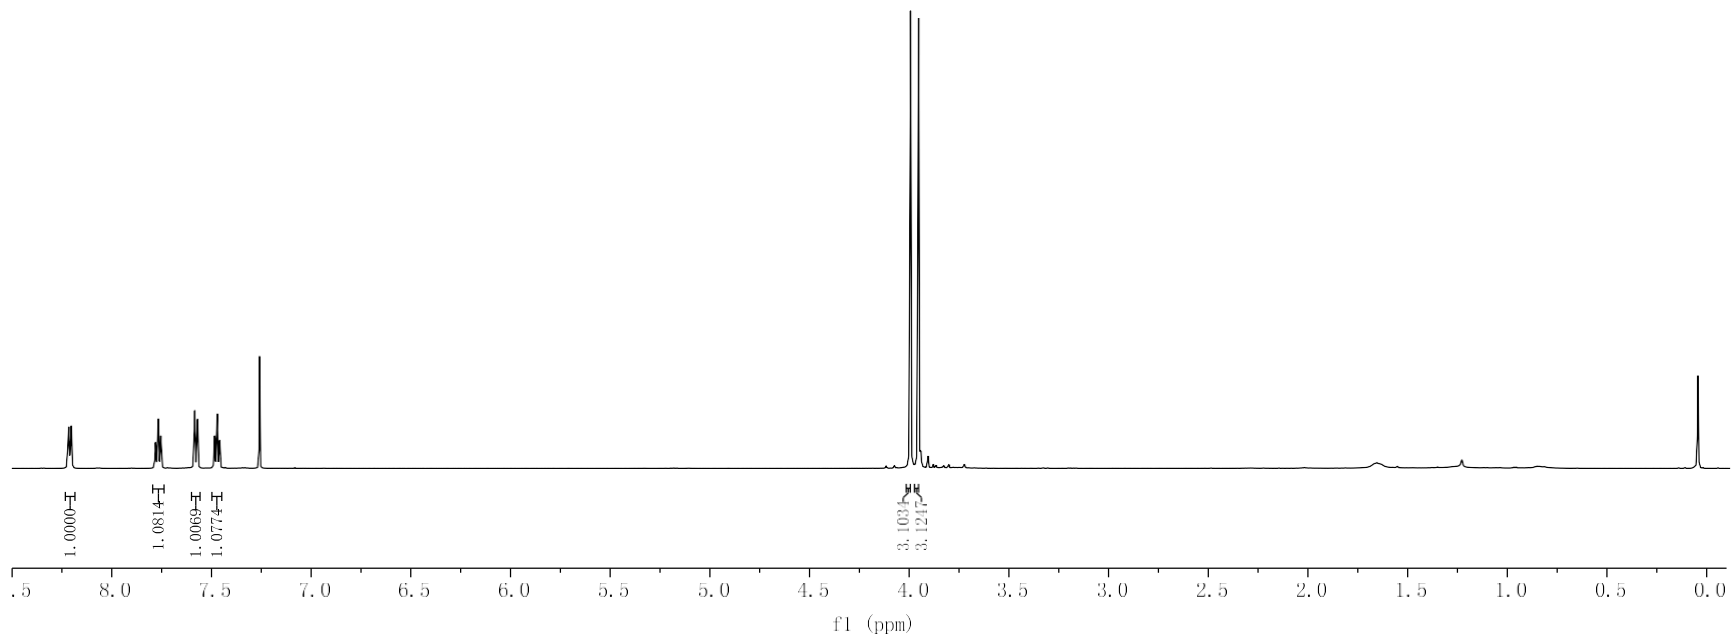

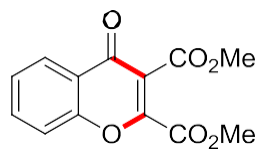

**3a**

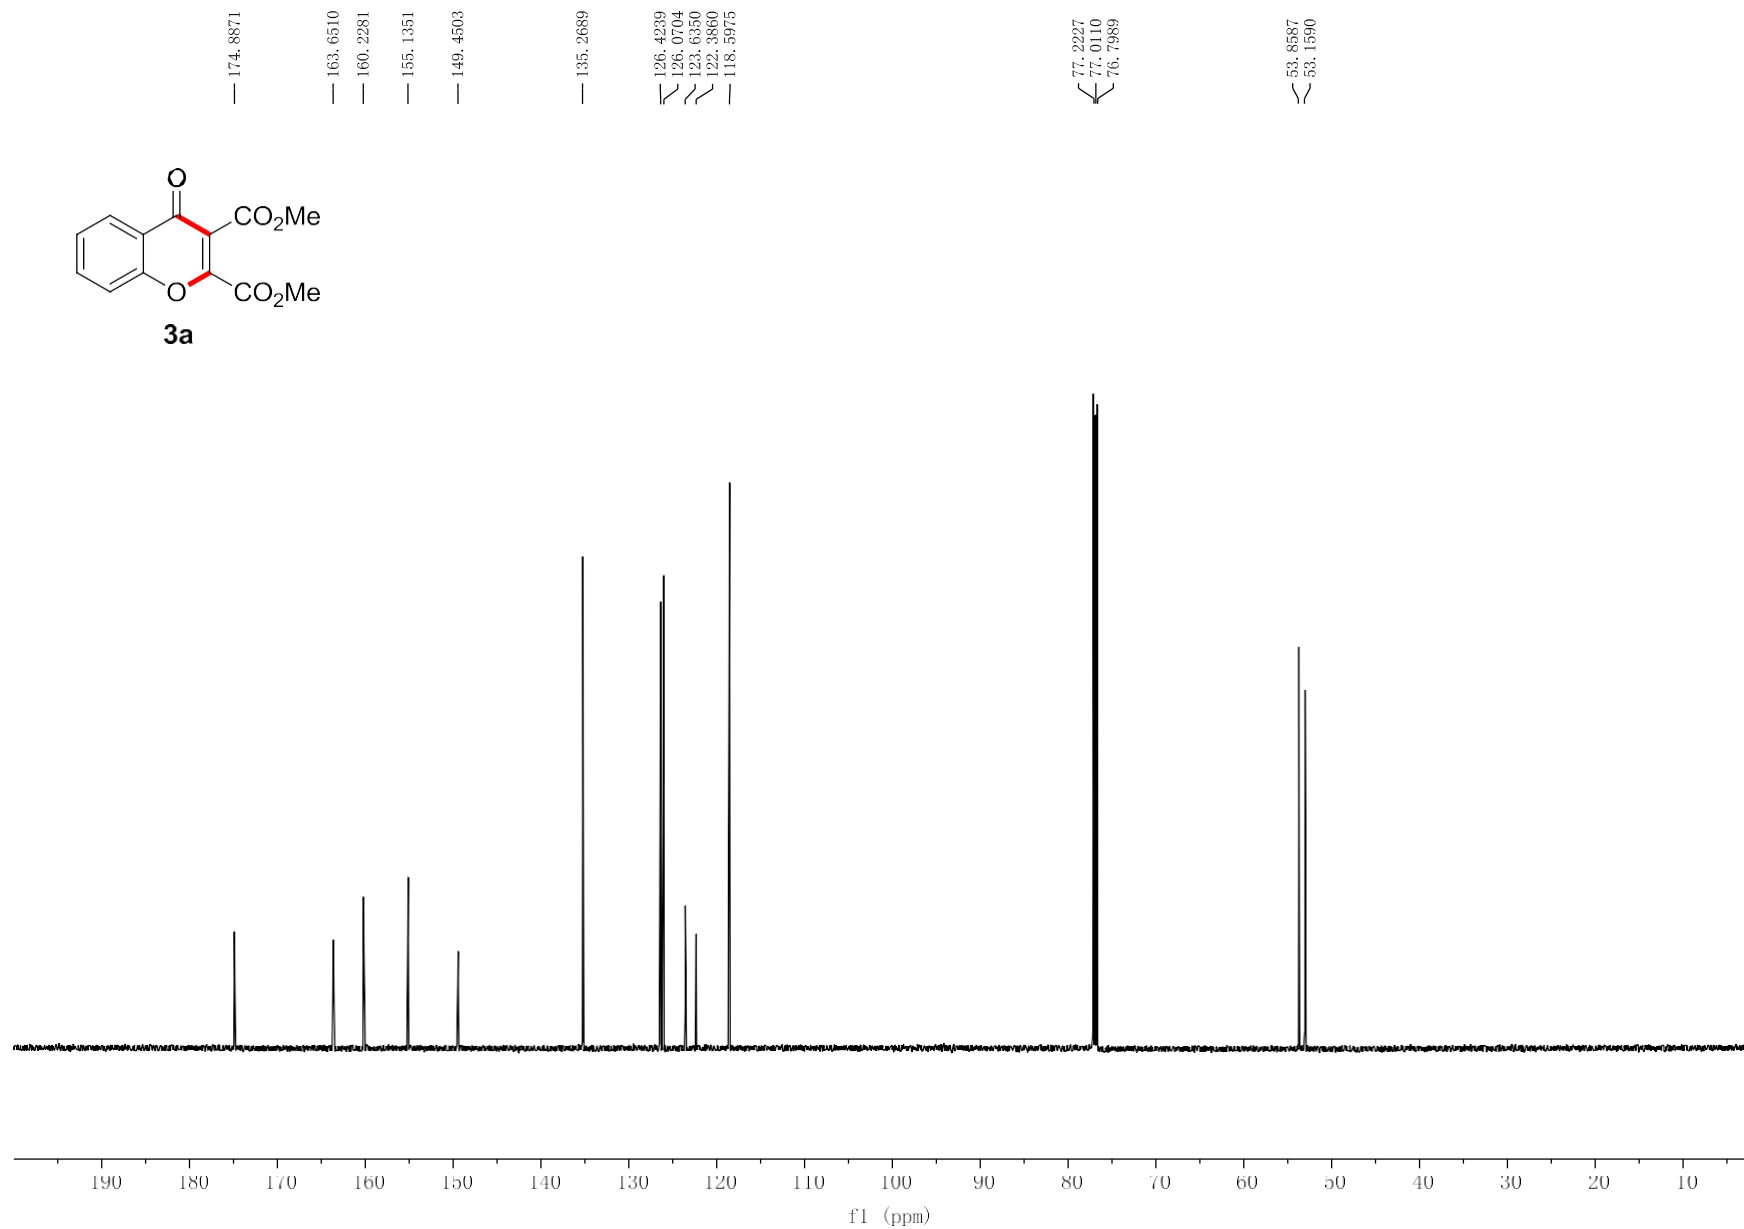

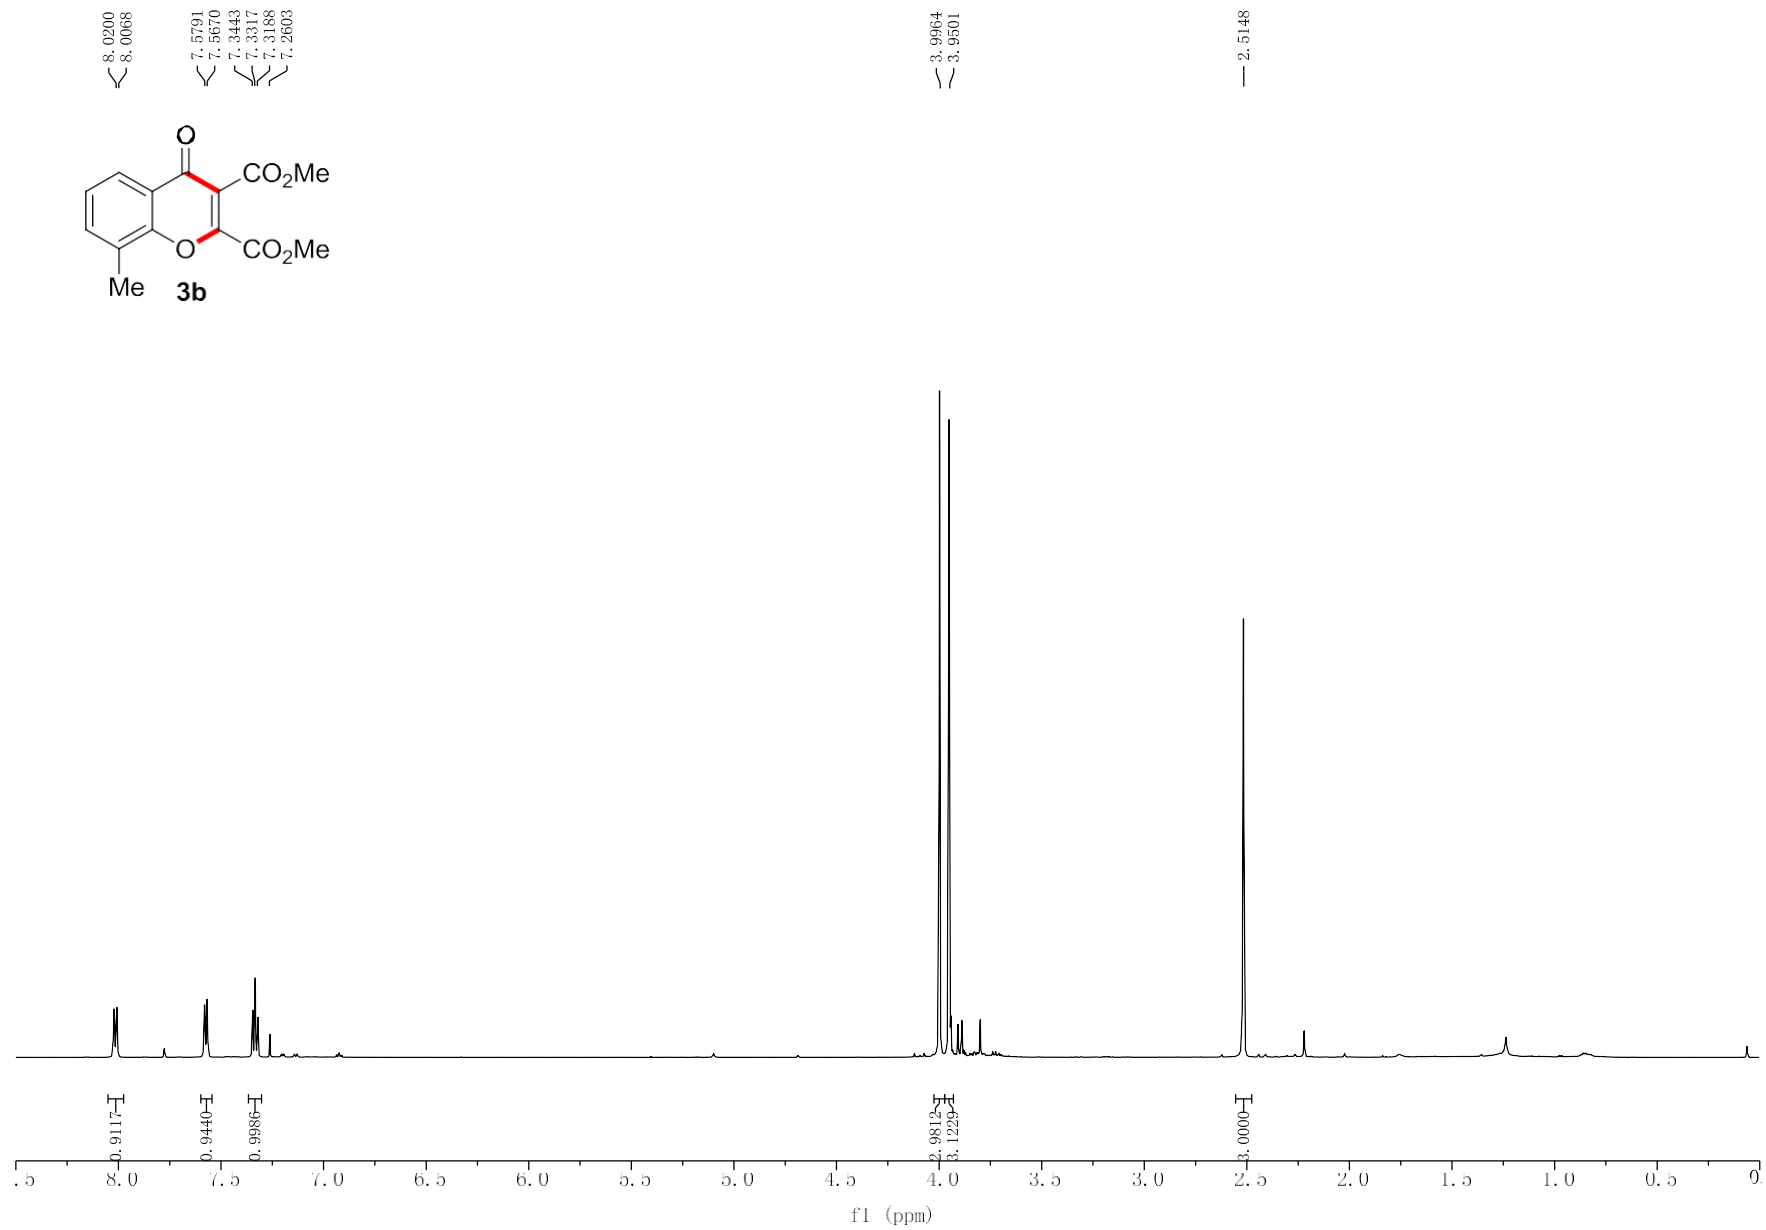

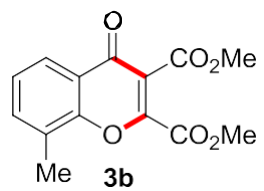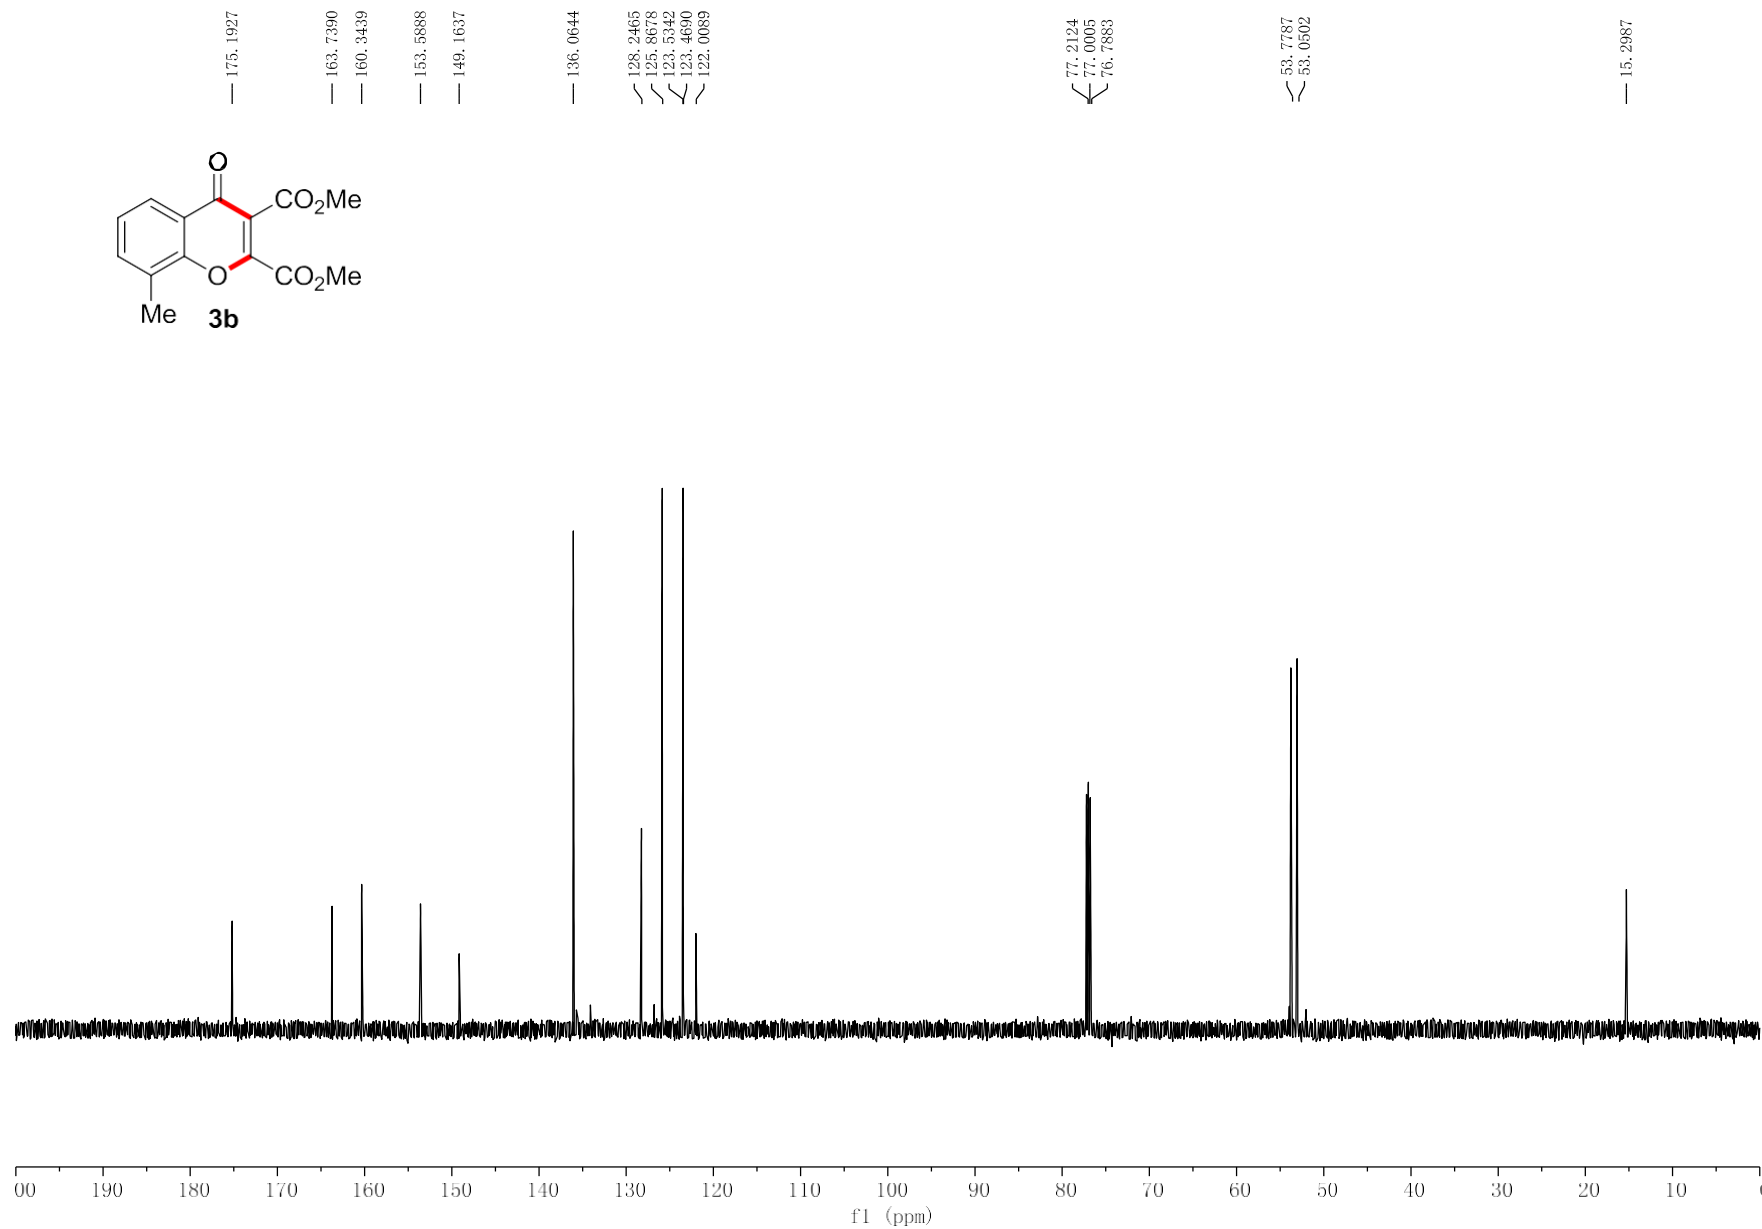

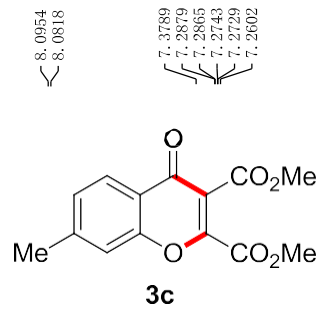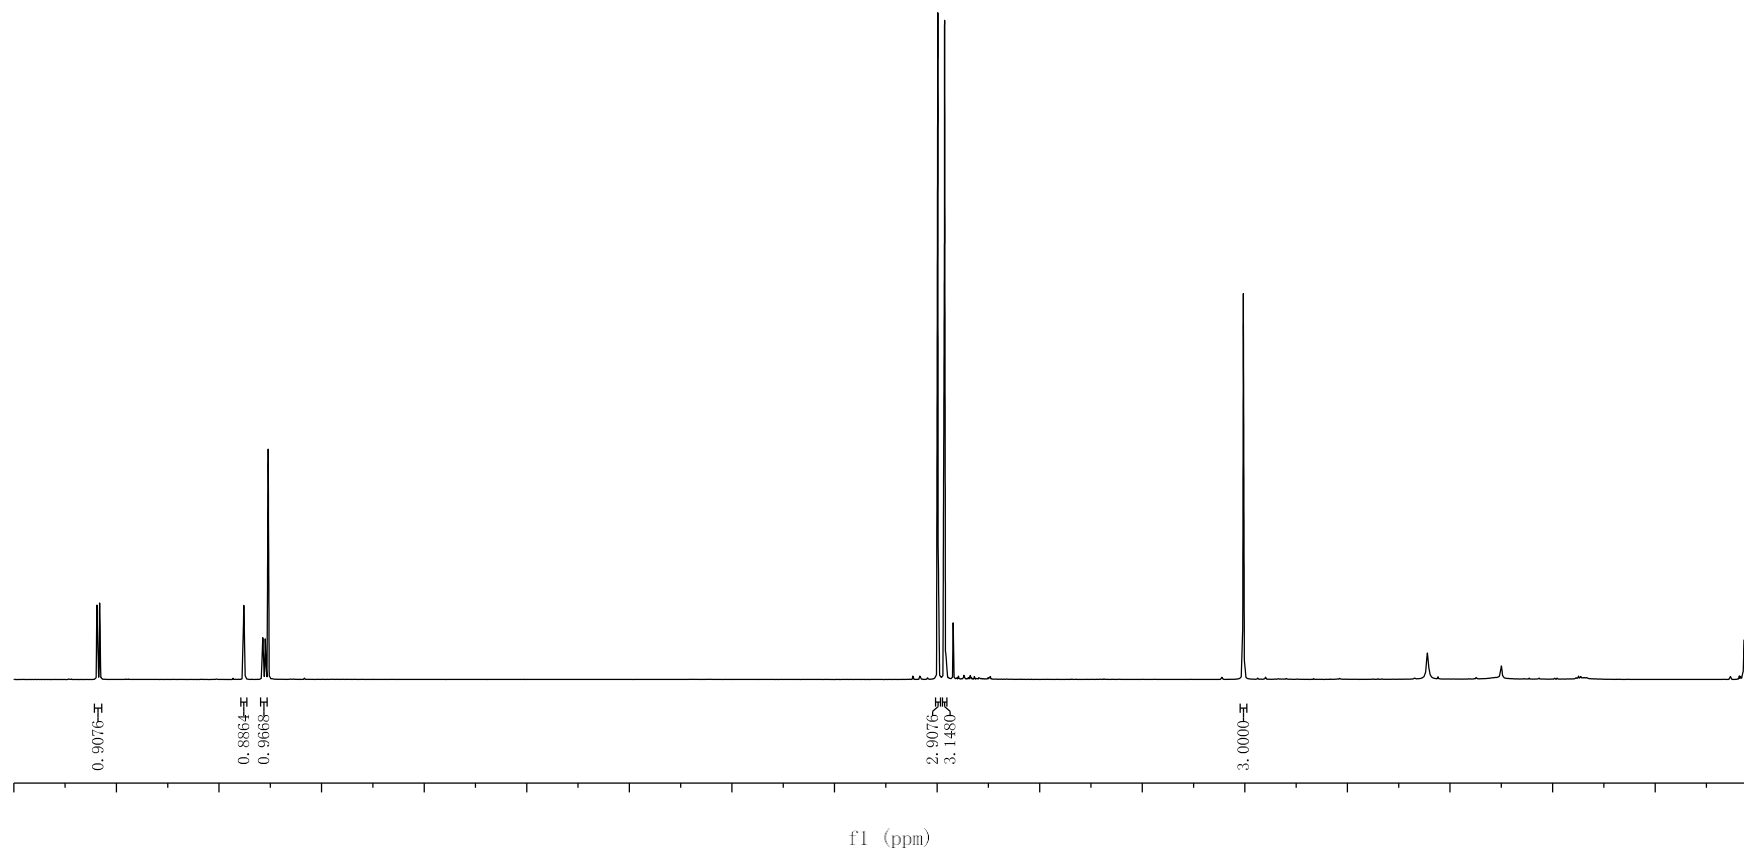

.5 8.0 7.5 7.0 6.5 6.0 5.5 5.0 4.5 4.0 3.5 3.0 2.5 2.0 1.5 1.0 0.5 0.

f1 (ppm)

S21

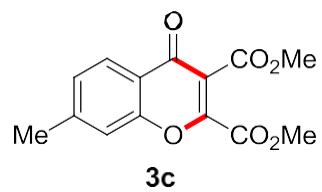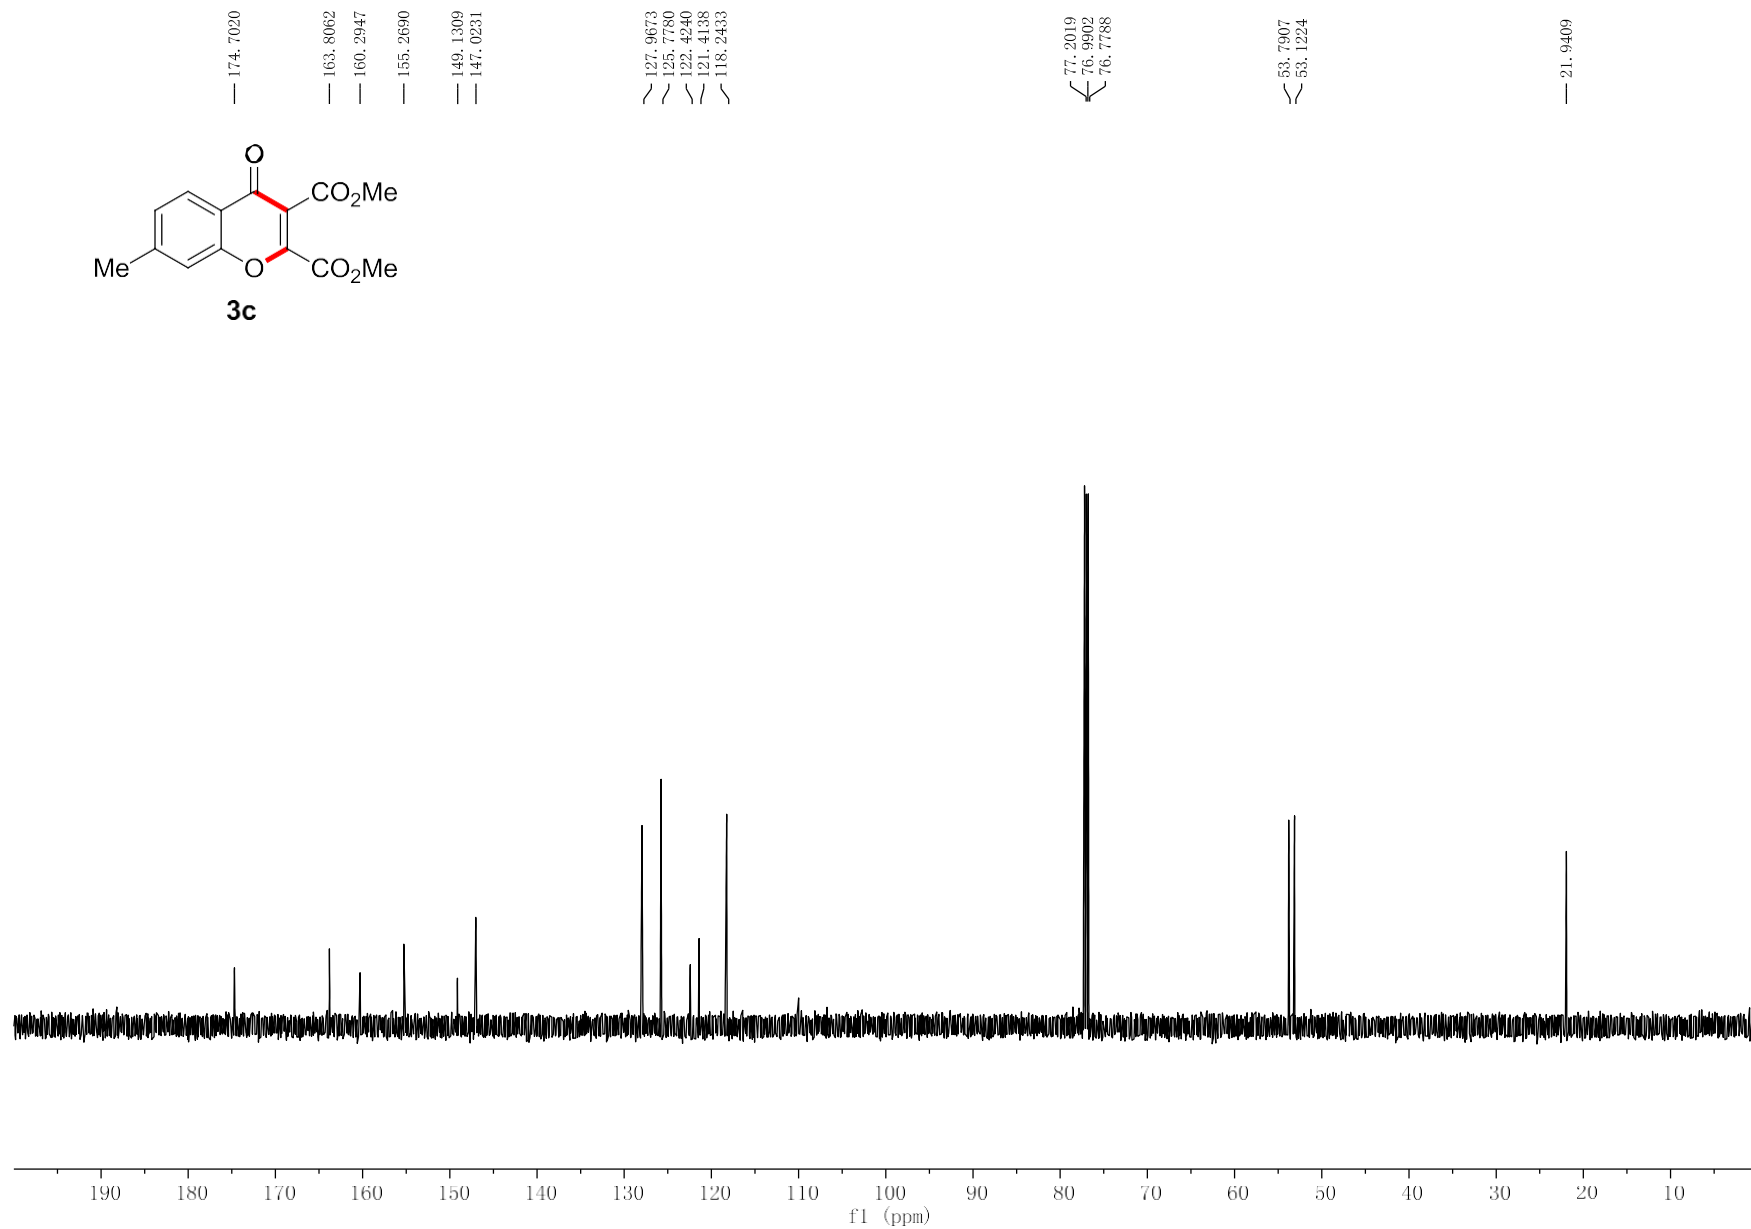



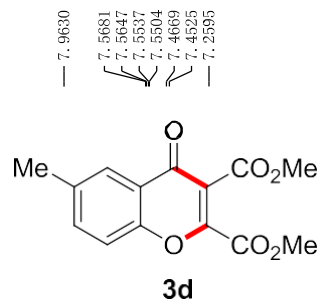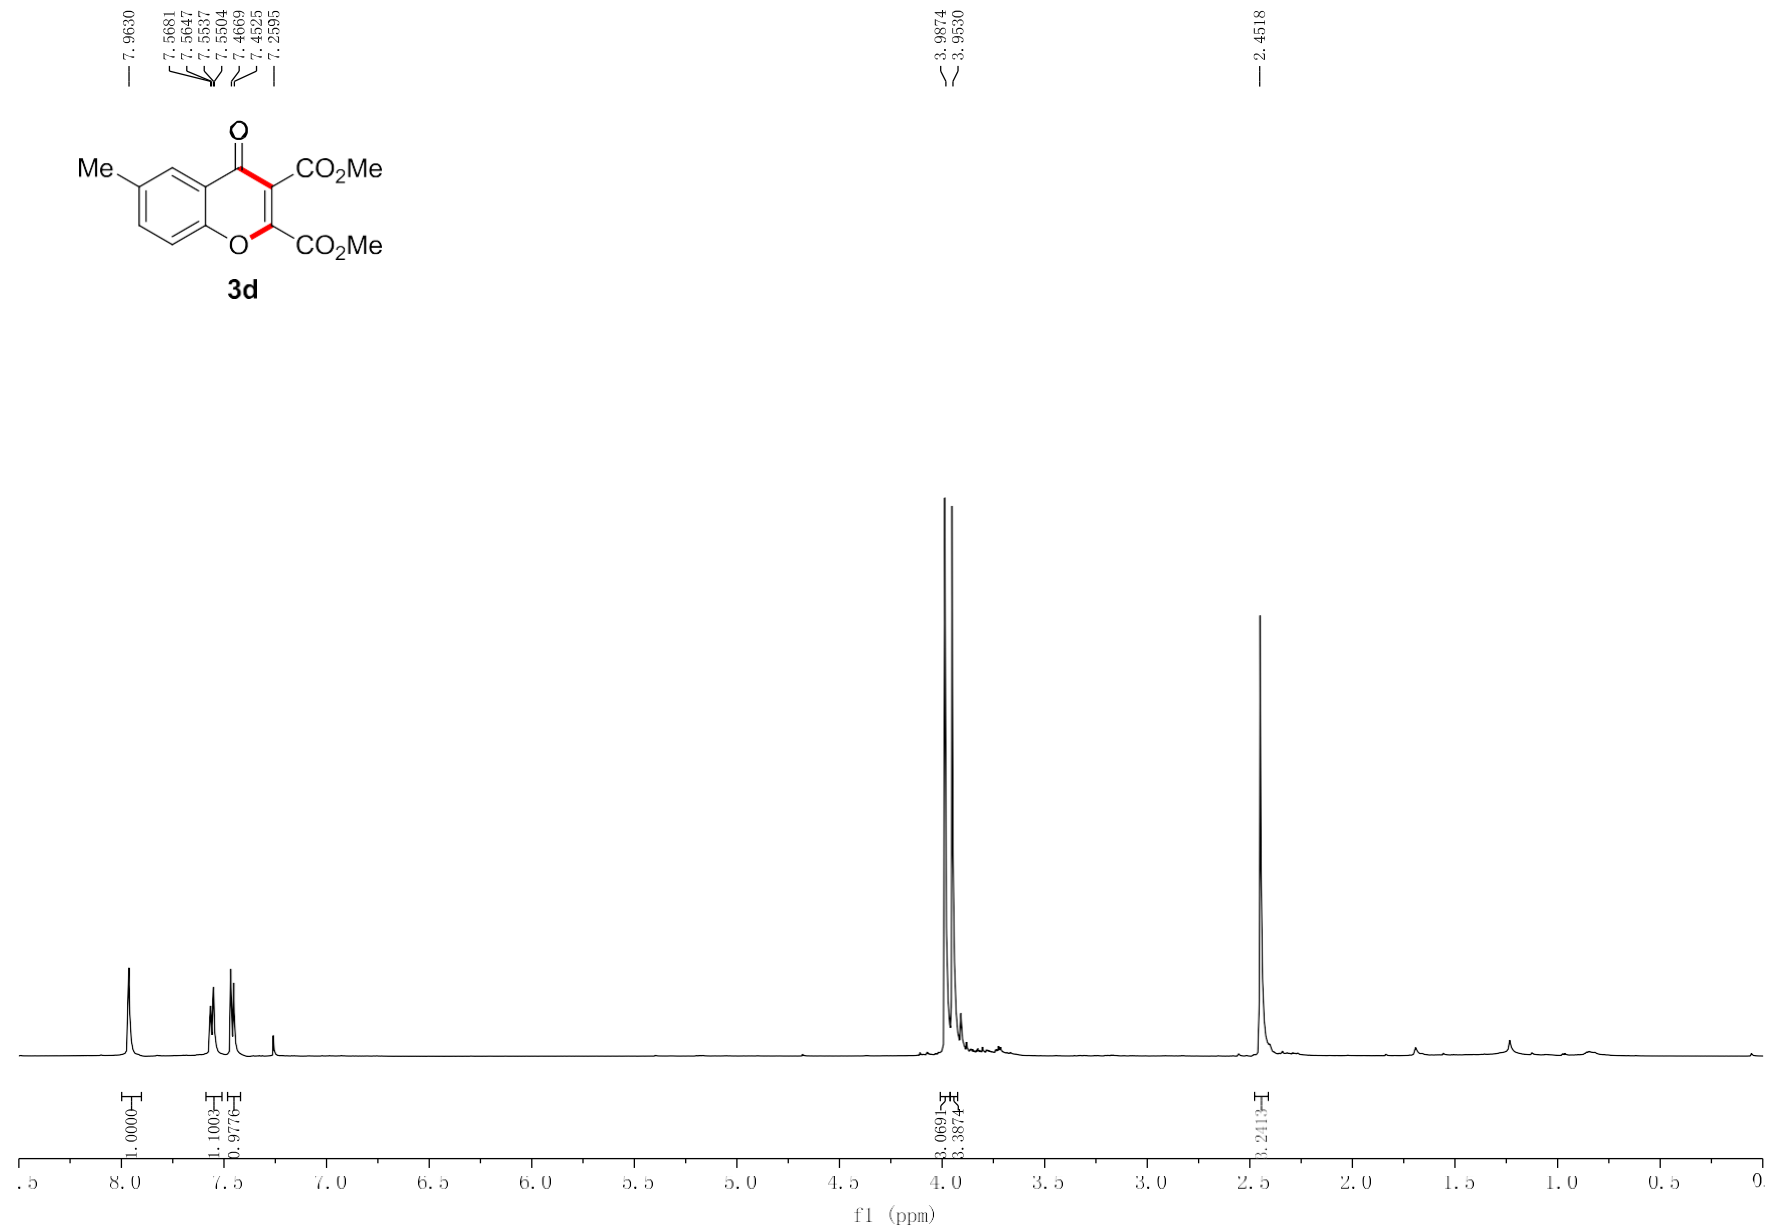

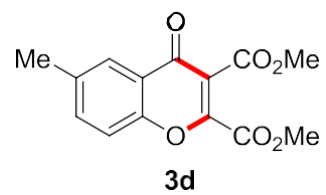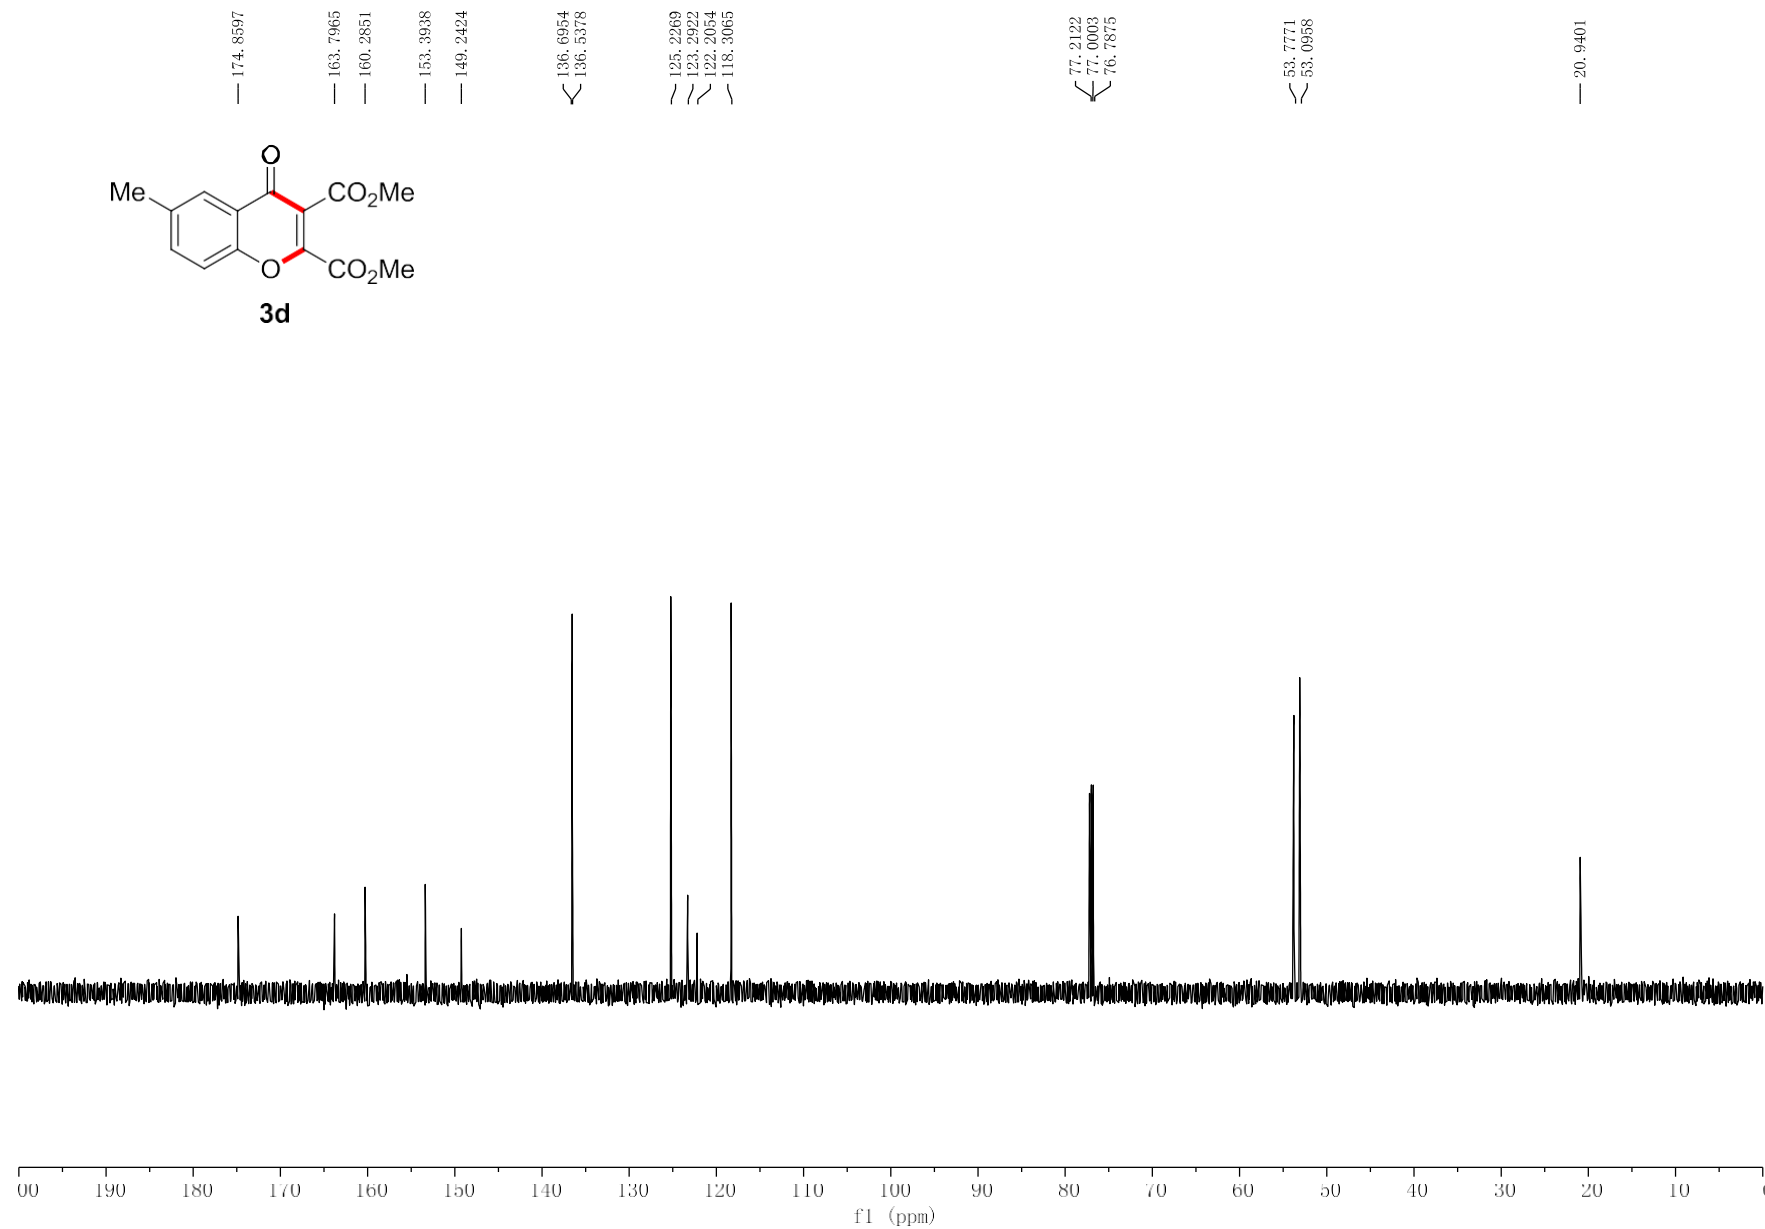

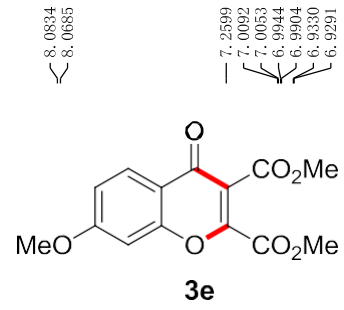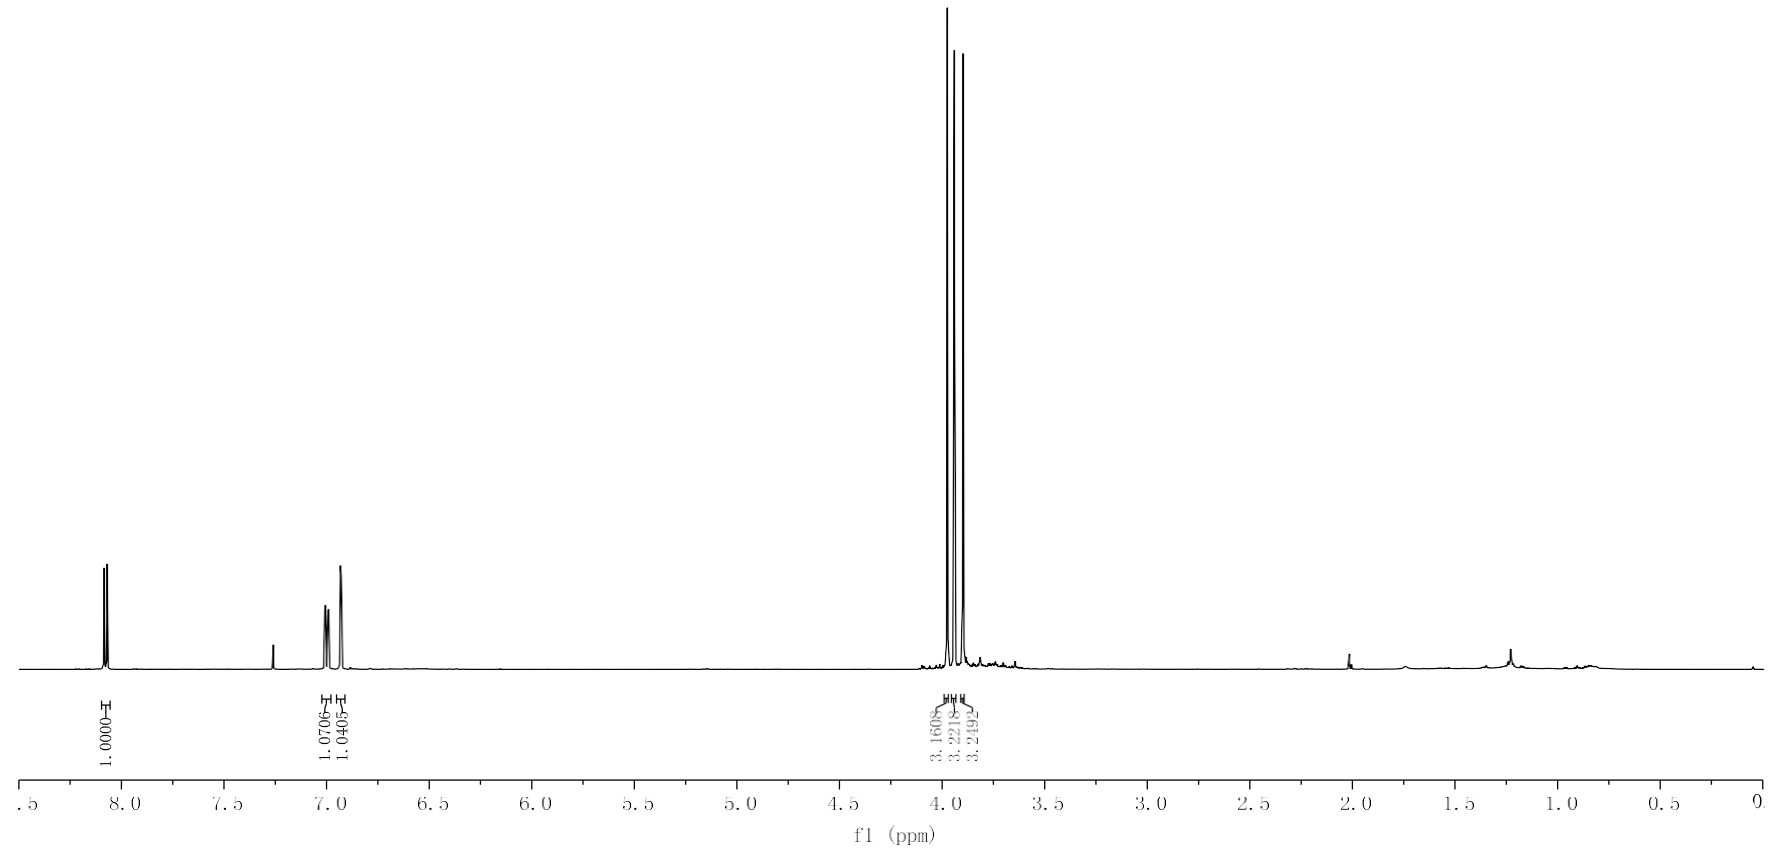

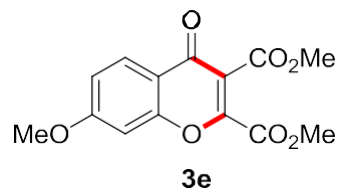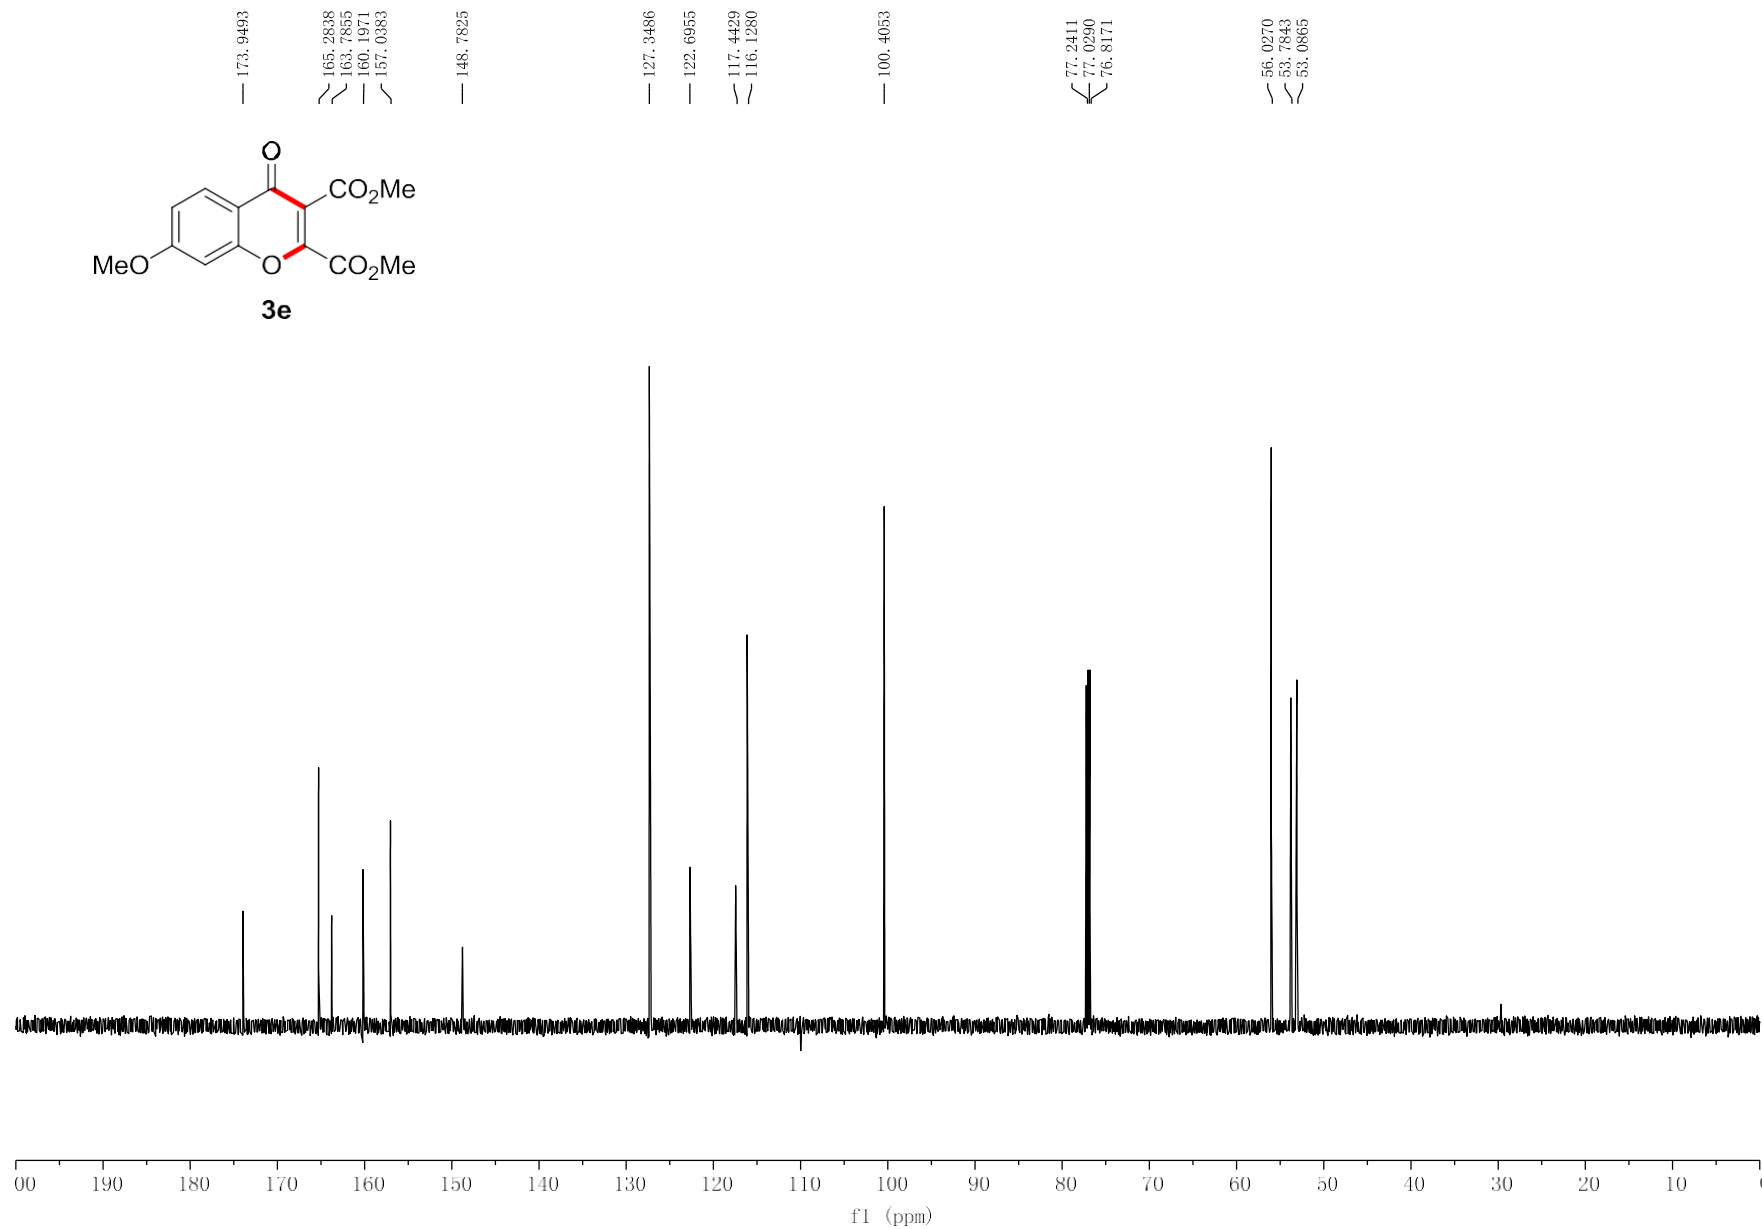

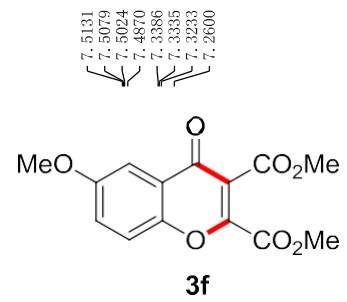

3.9829  
3.9530  
3.8766

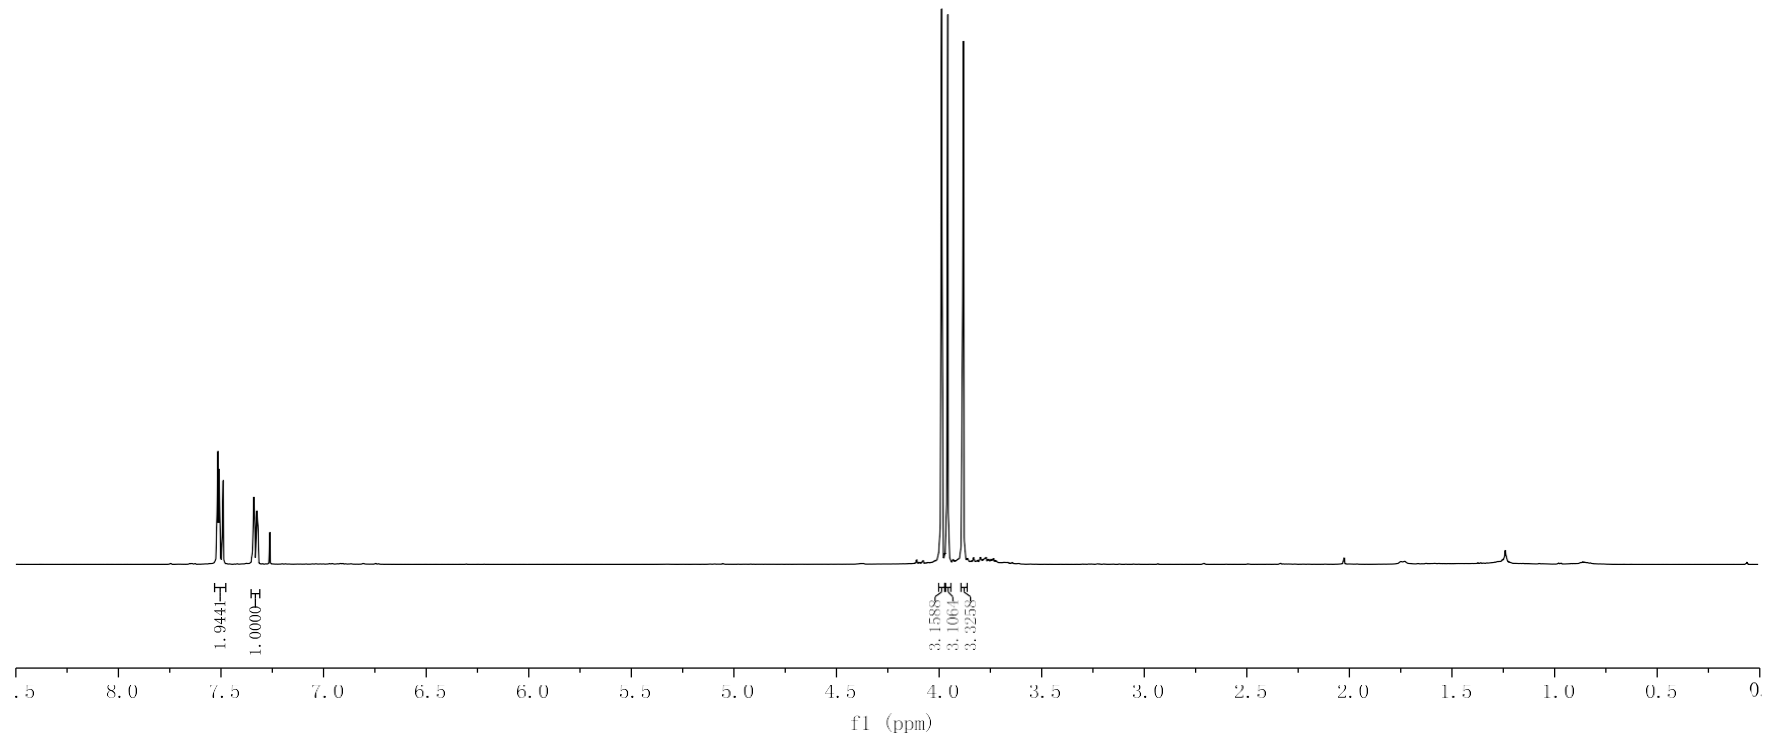

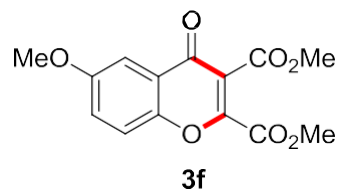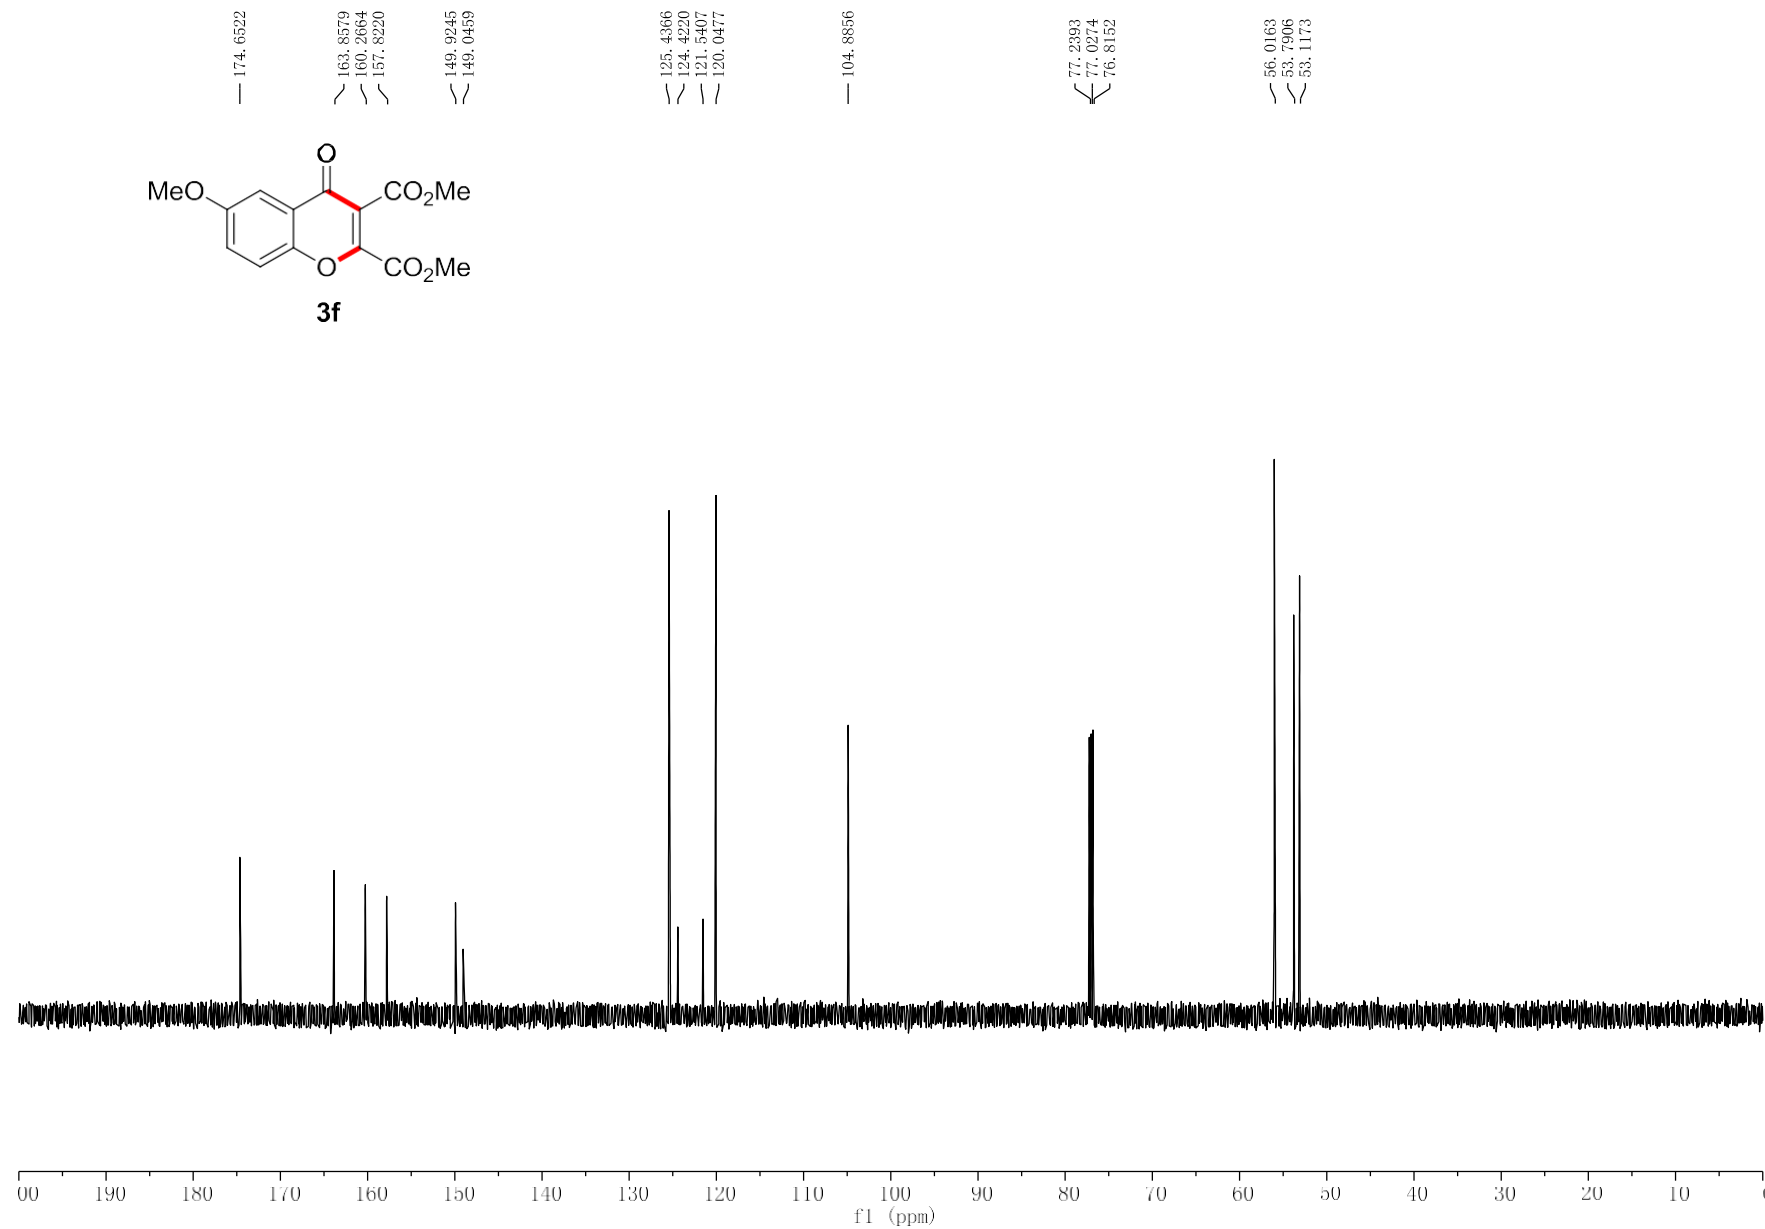

8.1286  
8.1254  
8.1137  
8.1105  
7.4423  
7.4293  
7.4181  
7.4049  
7.3861  
7.3831  
7.3795  
7.3770  
7.3718  
7.3642  
7.3610  
7.2597  
7.1098  
7.1060  
7.1036  
7.0949  
7.0911  
7.0887  
7.0302  
7.0265

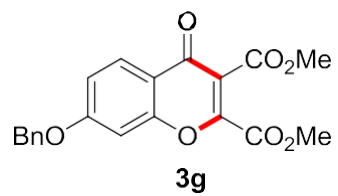

5.1681

3.9909  
3.9609

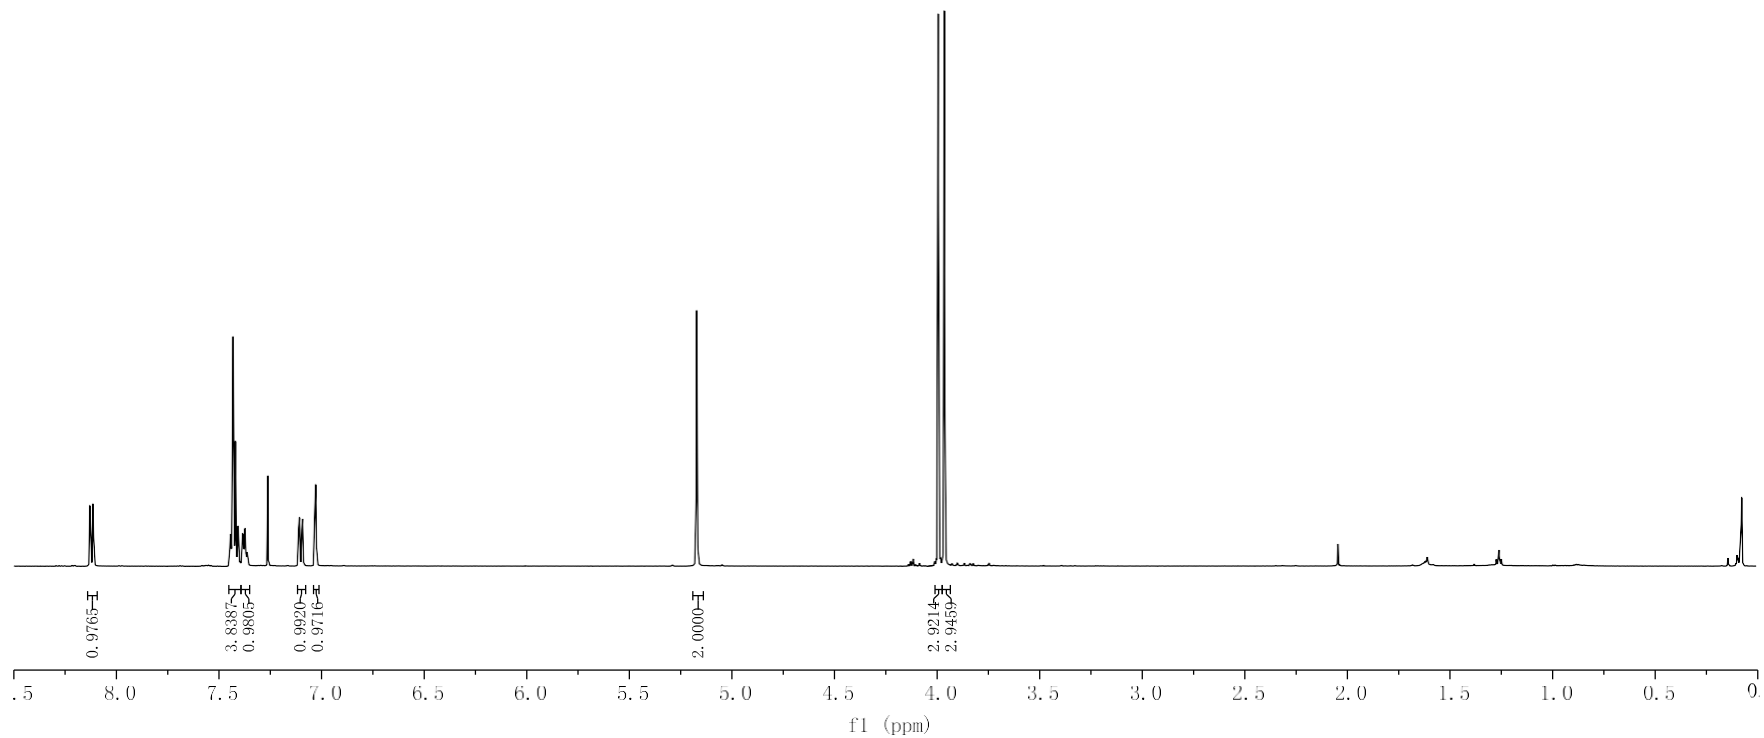

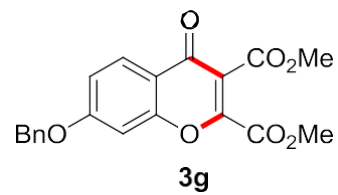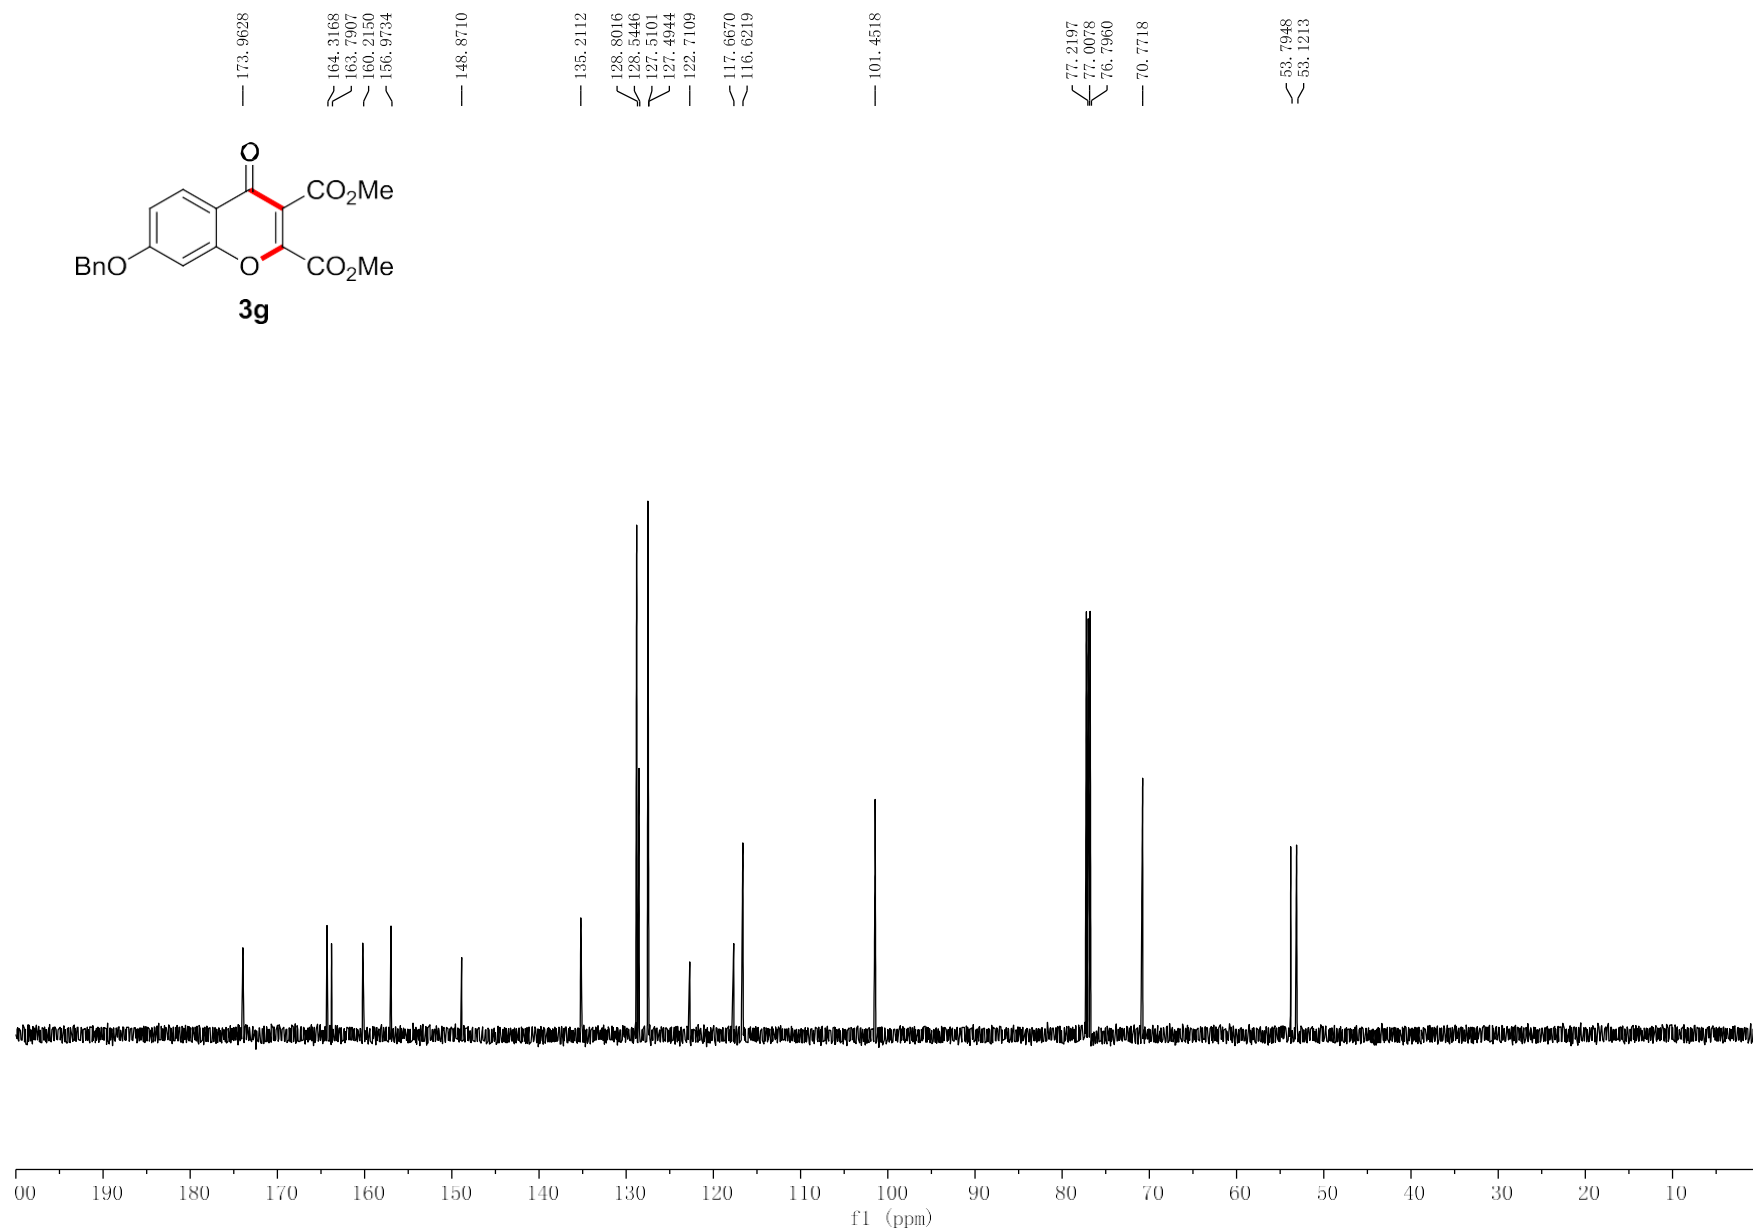



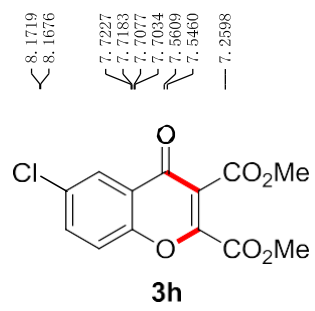

4.0076  
3.9684

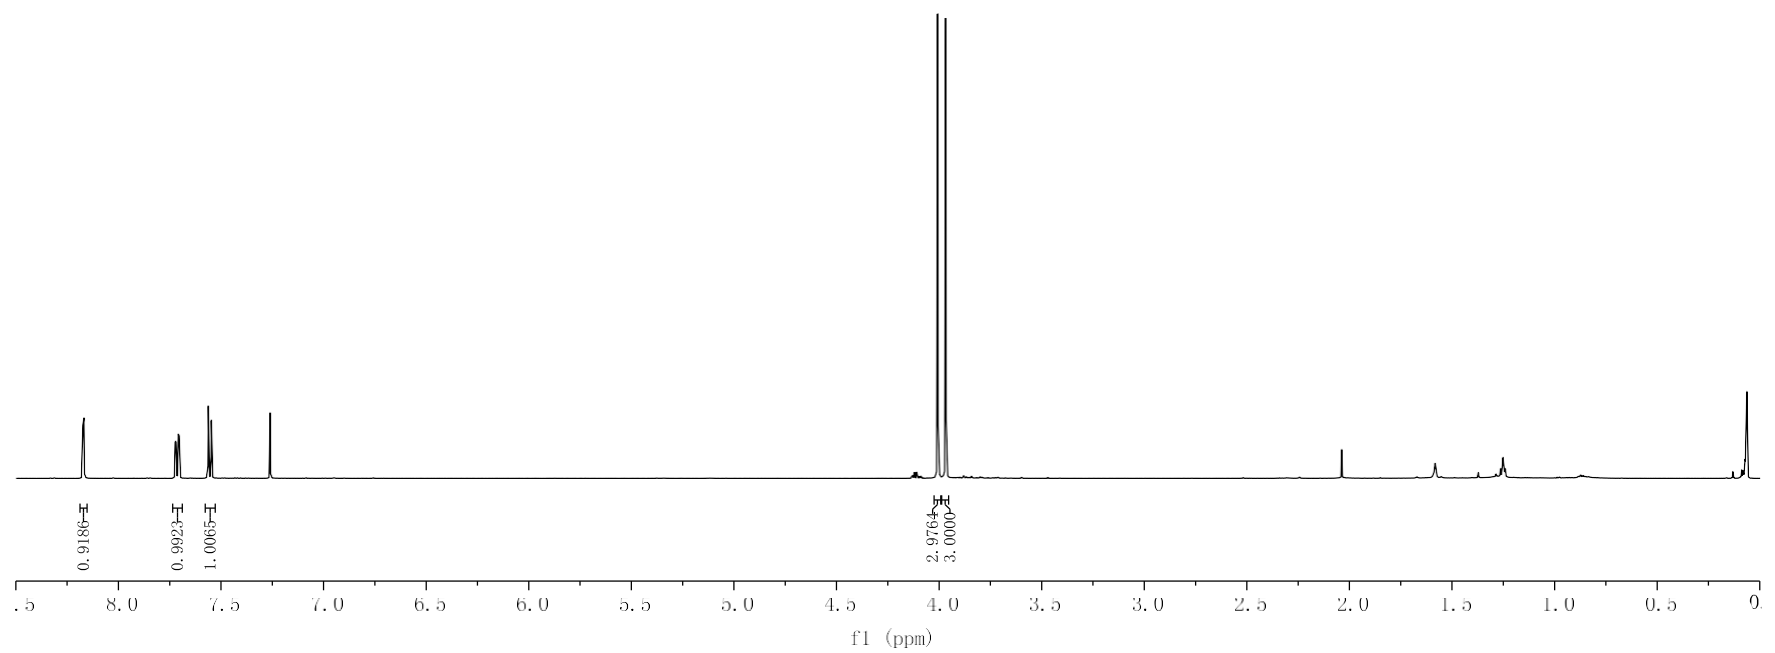

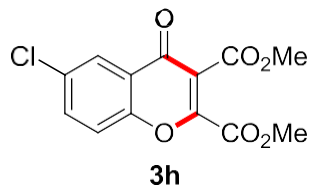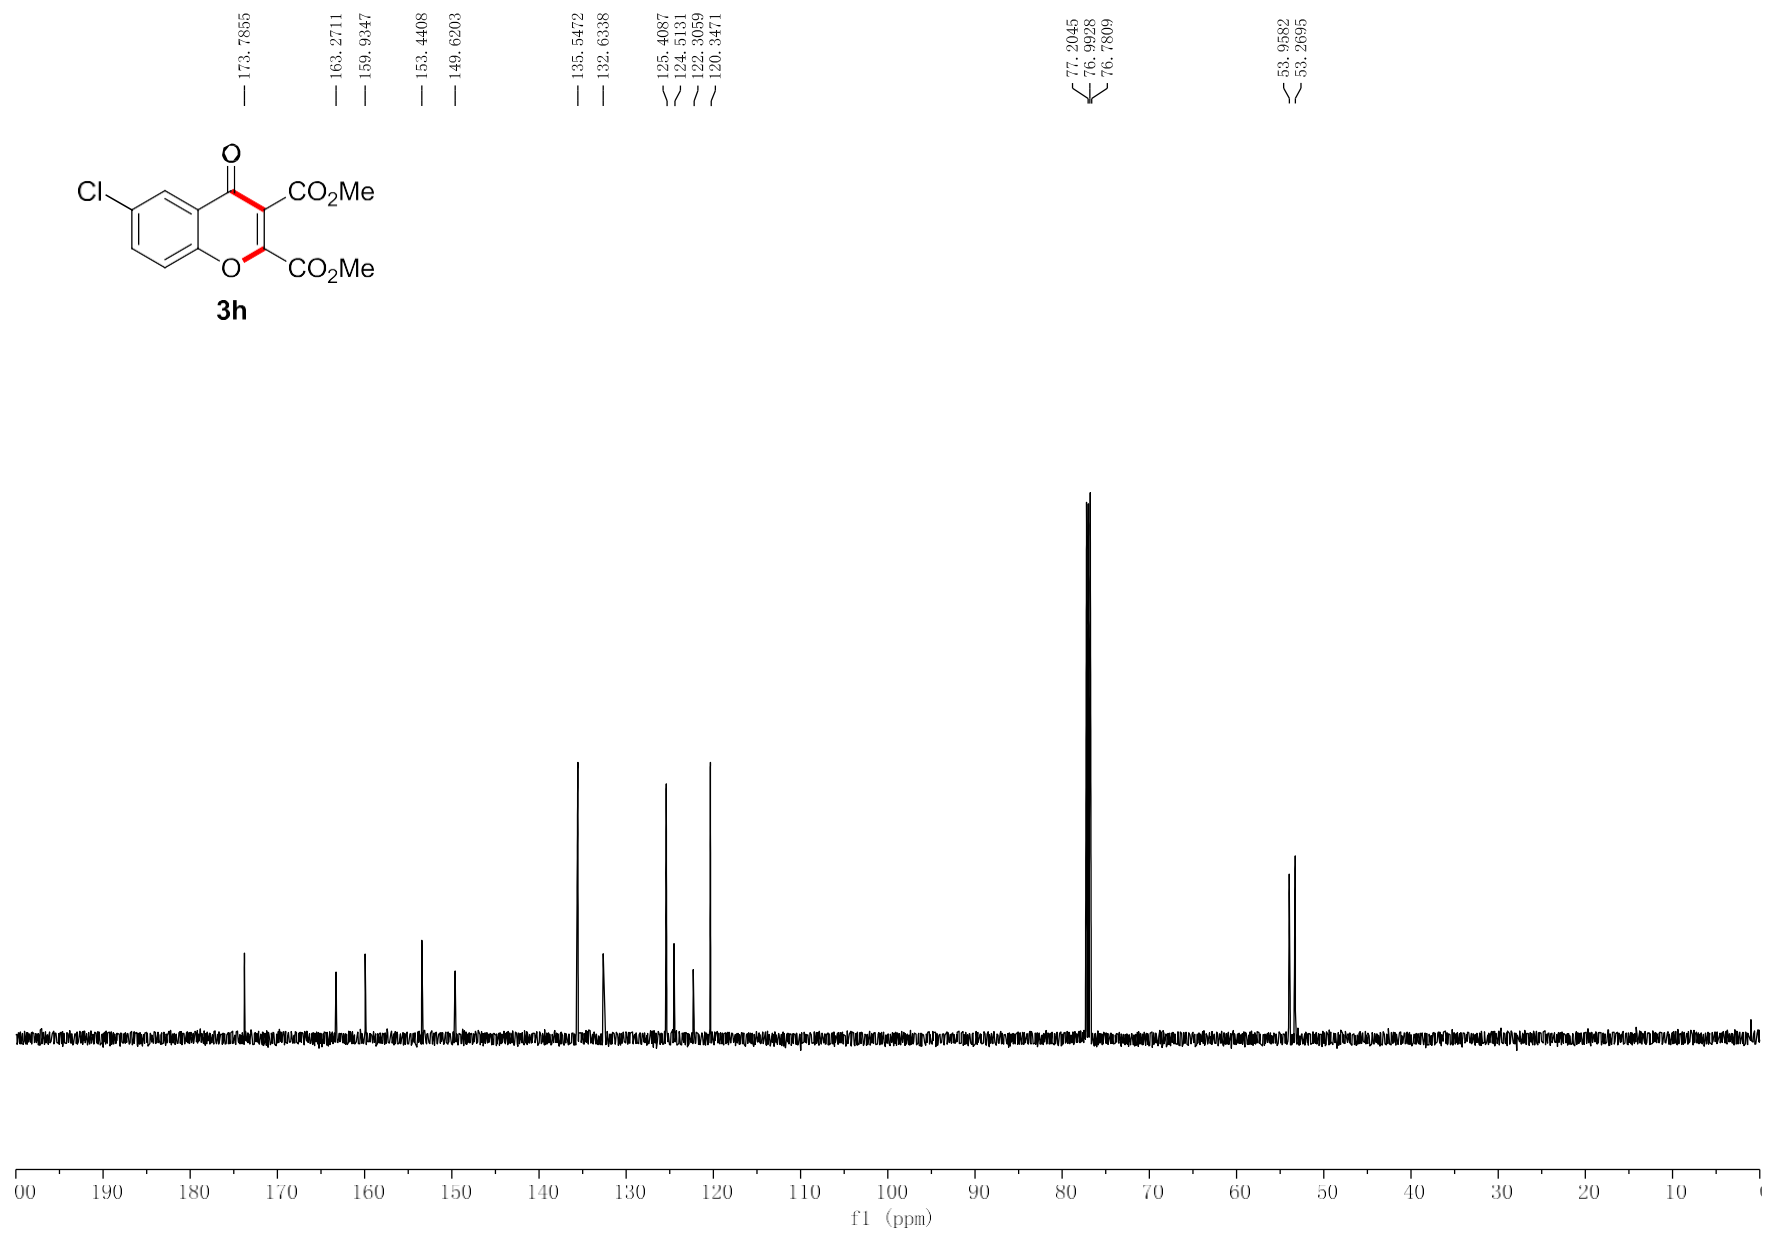

8.3344  
8.3304  
7.8620  
7.8579  
7.8471  
7.8431  
7.4945  
7.4796  
7.2597

4.0069  
3.9683

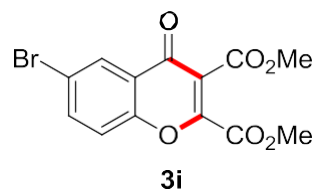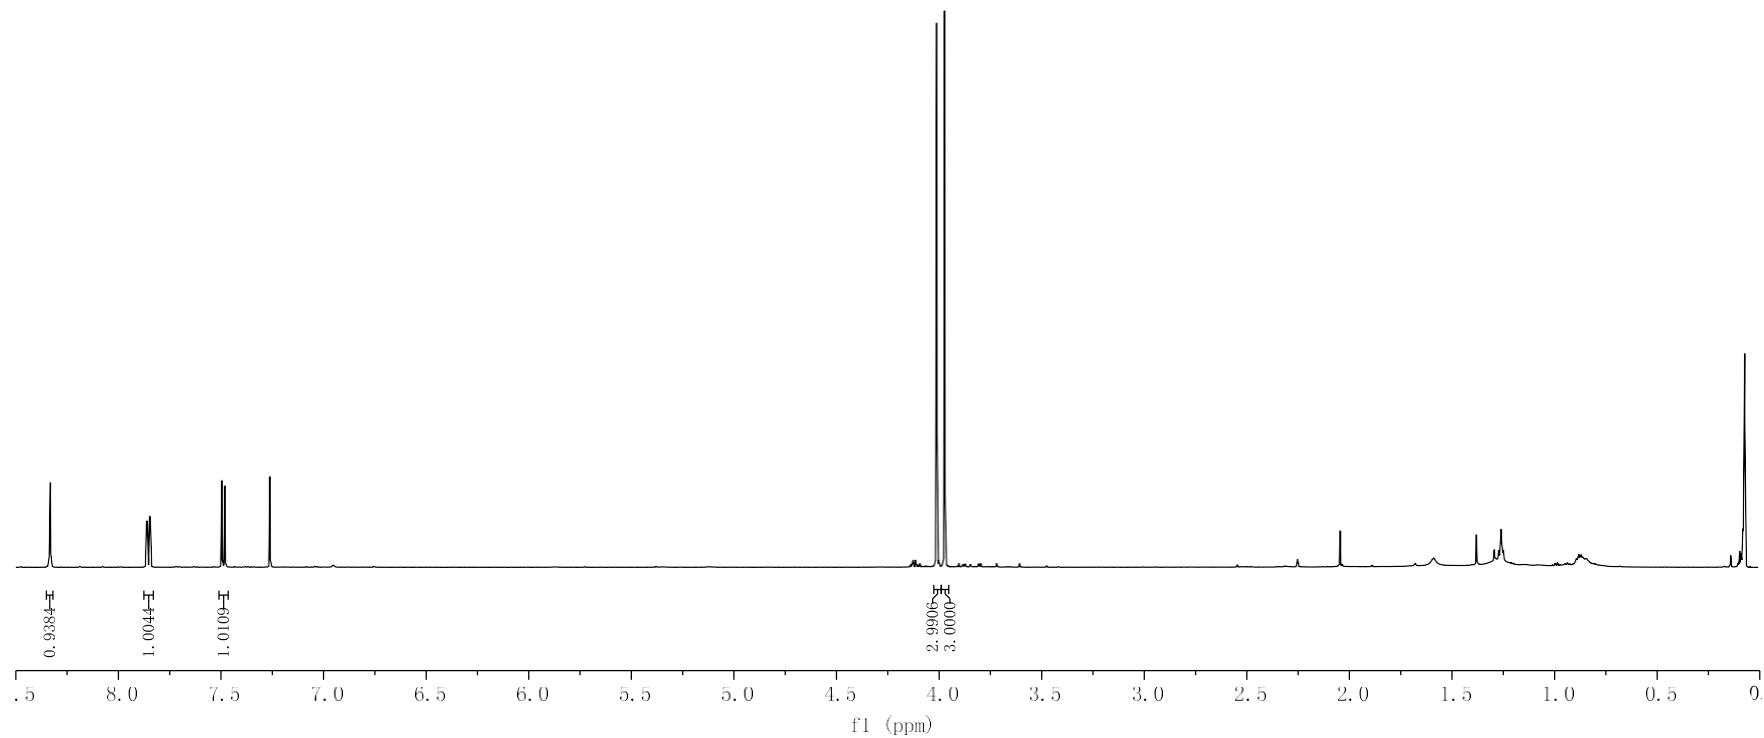

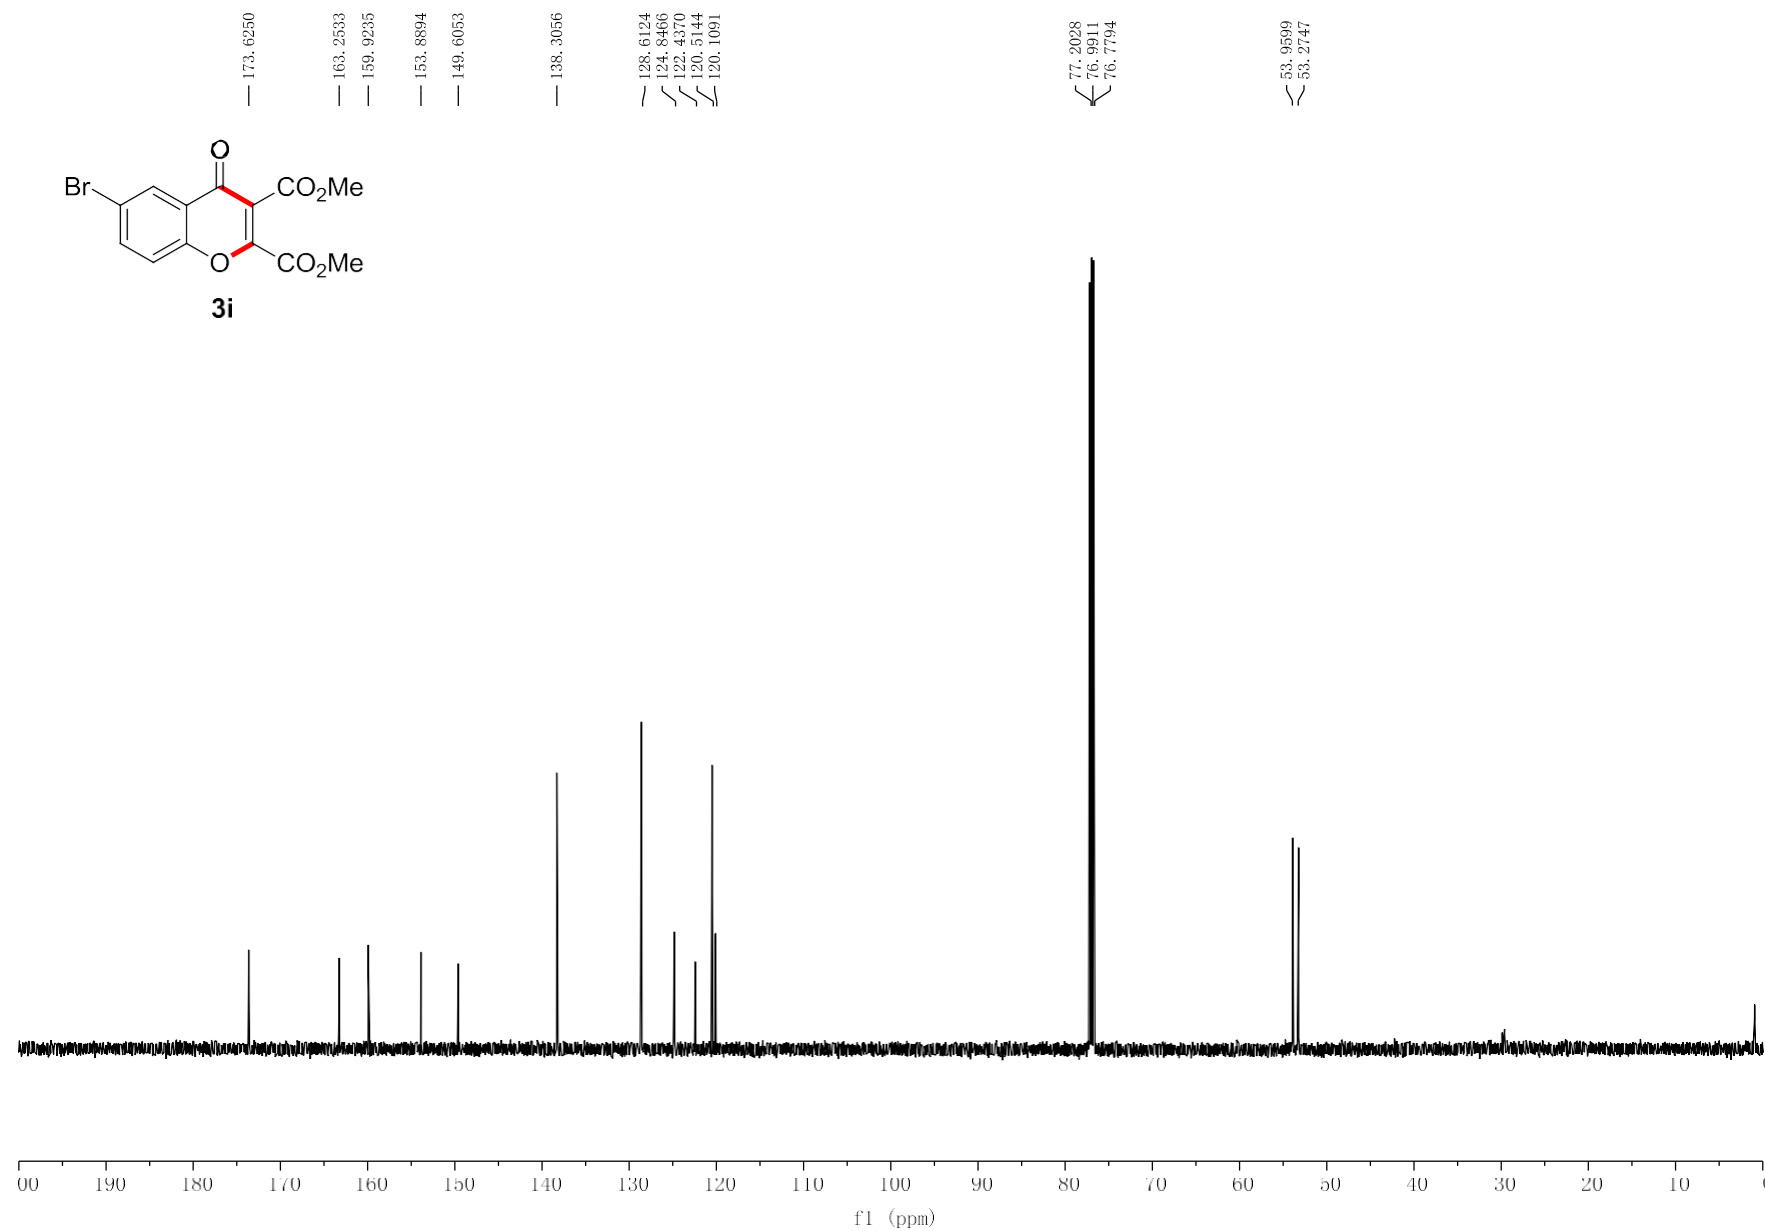

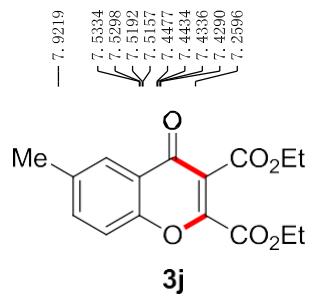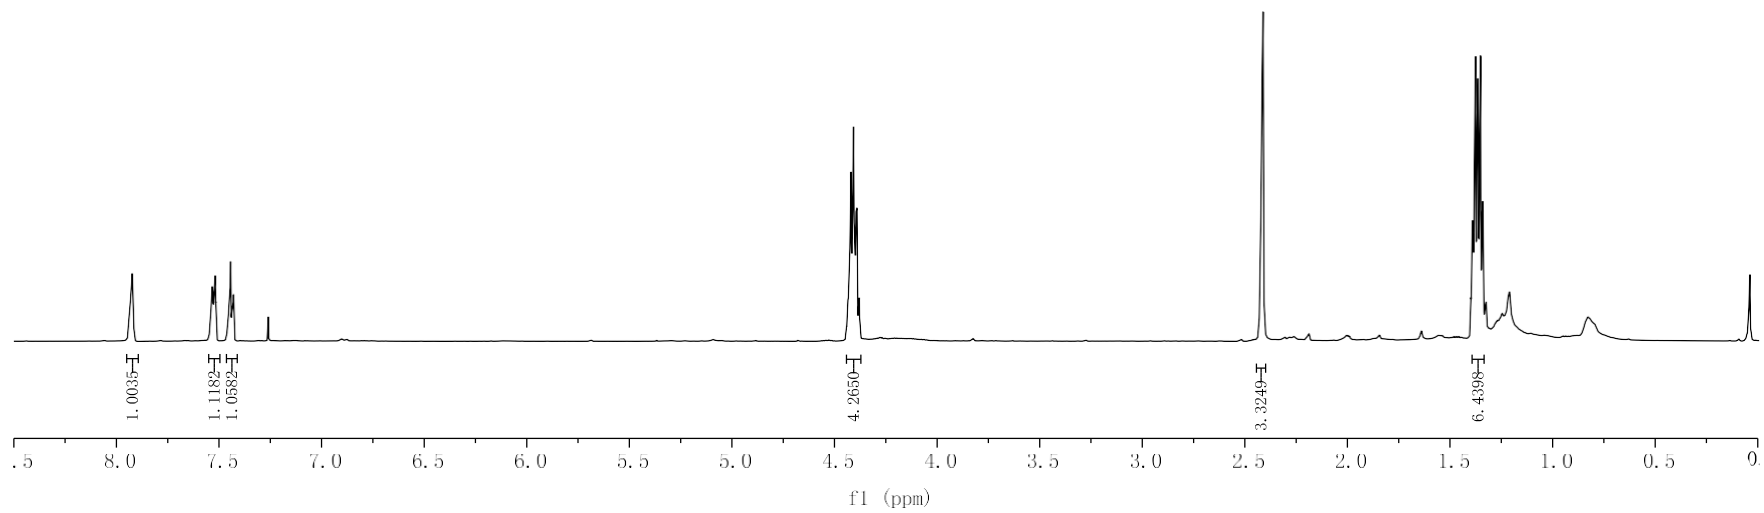

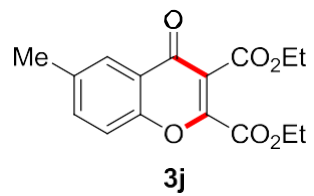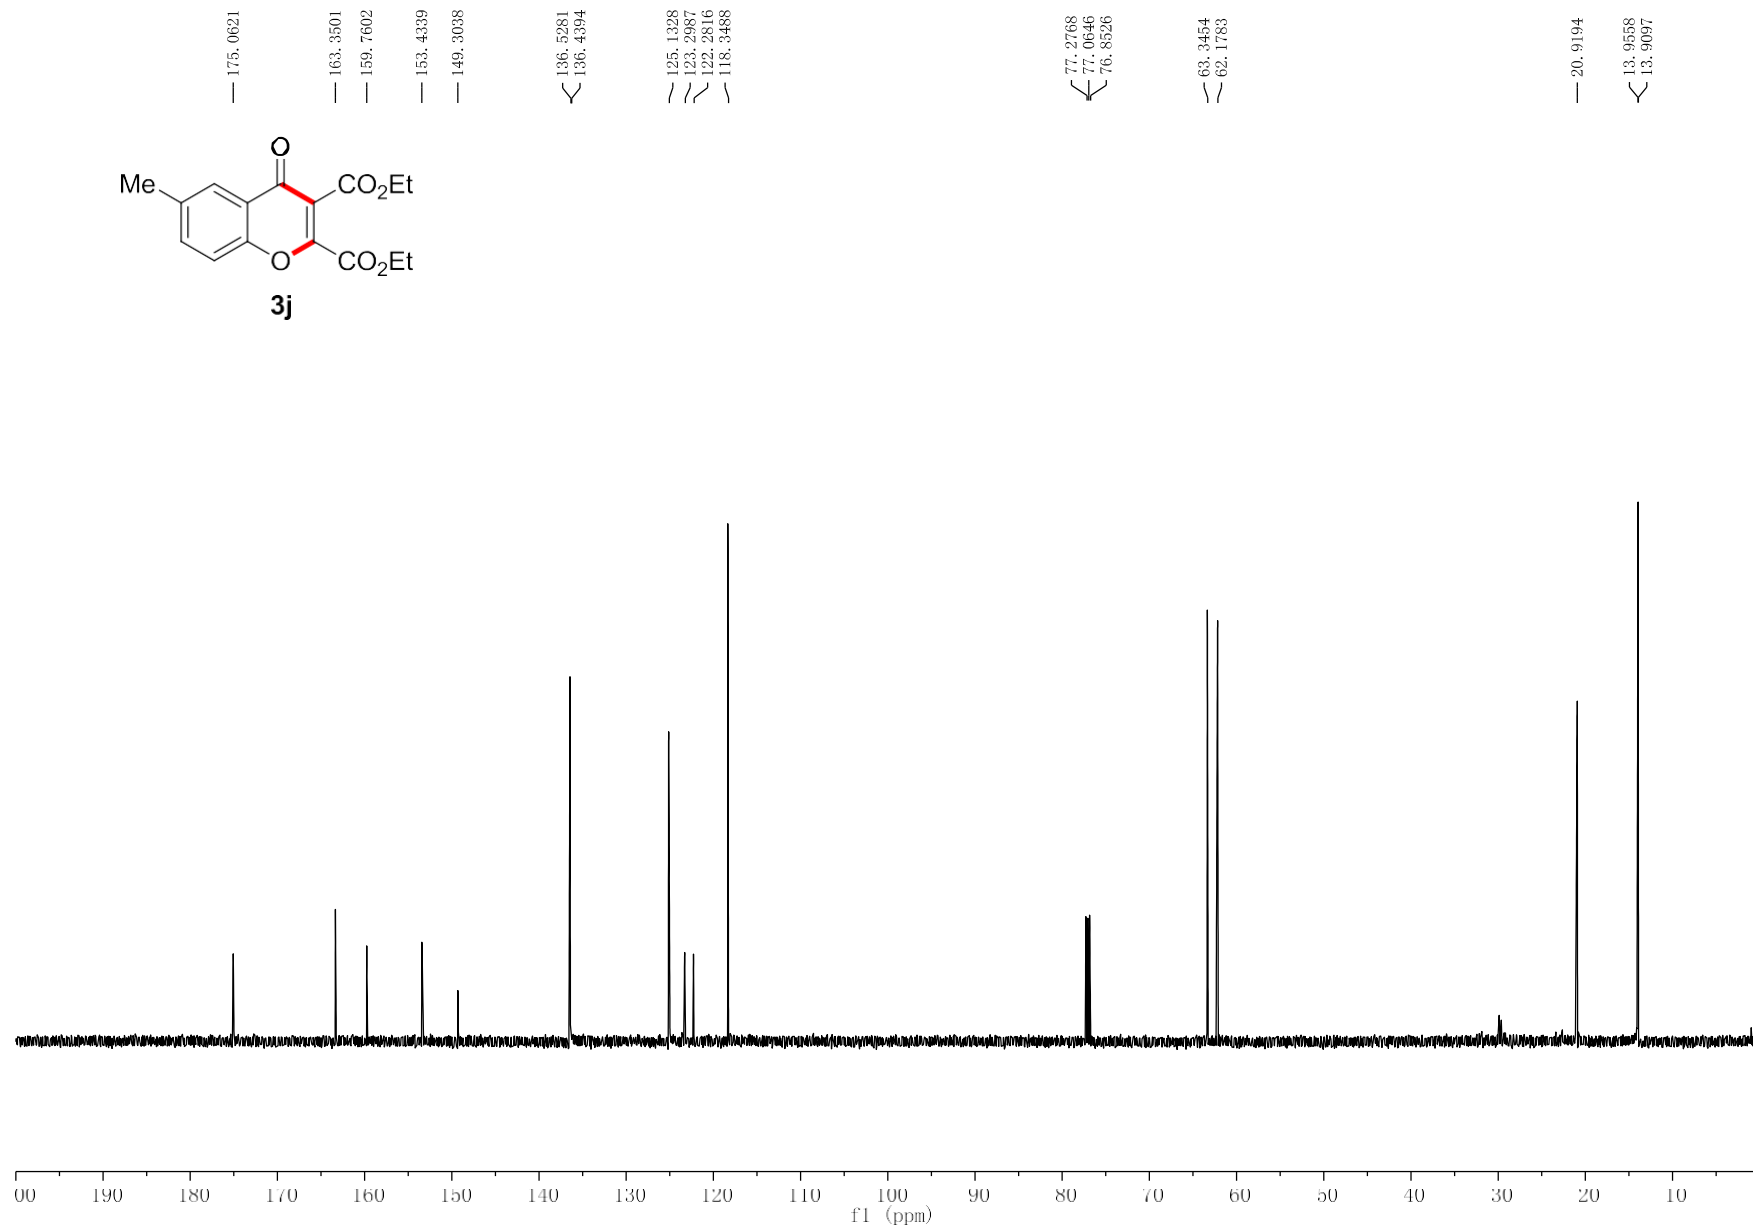

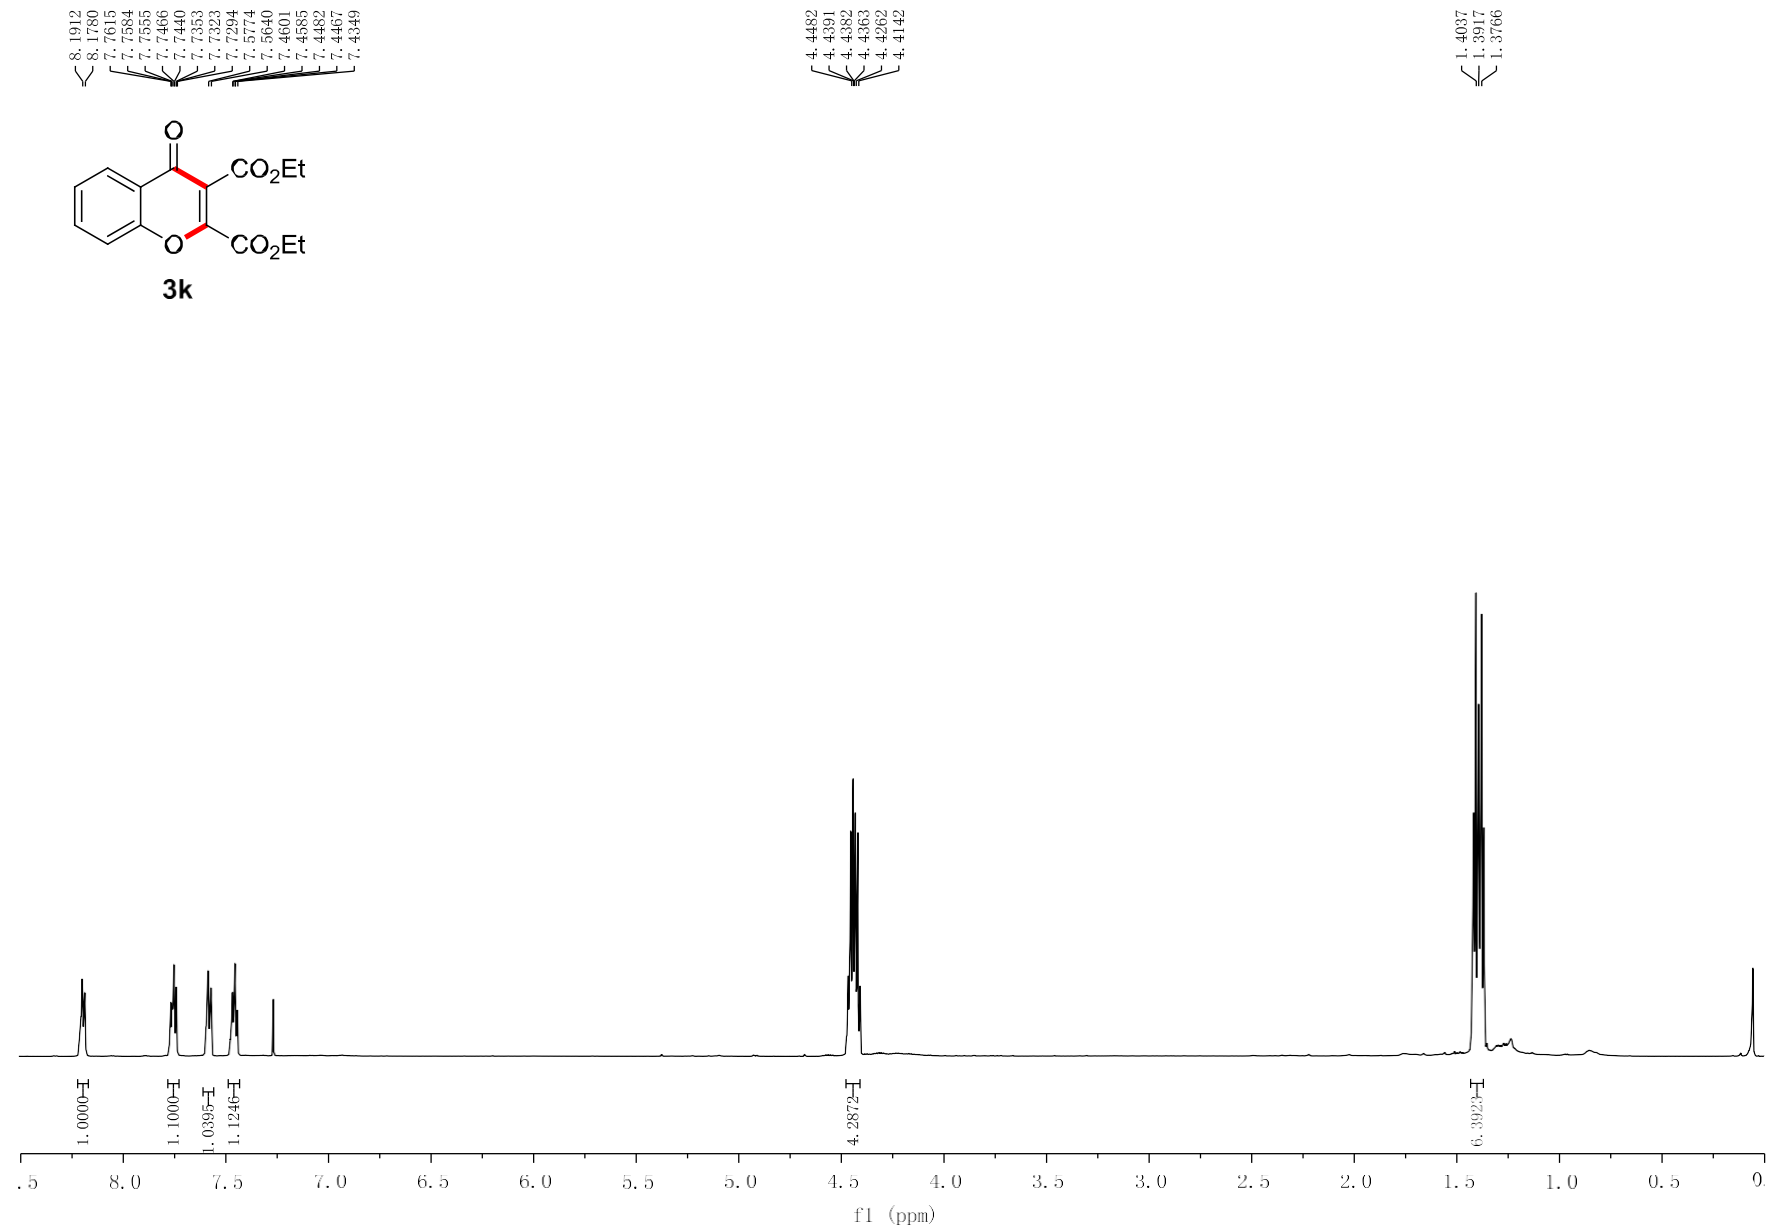

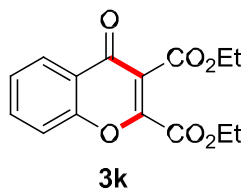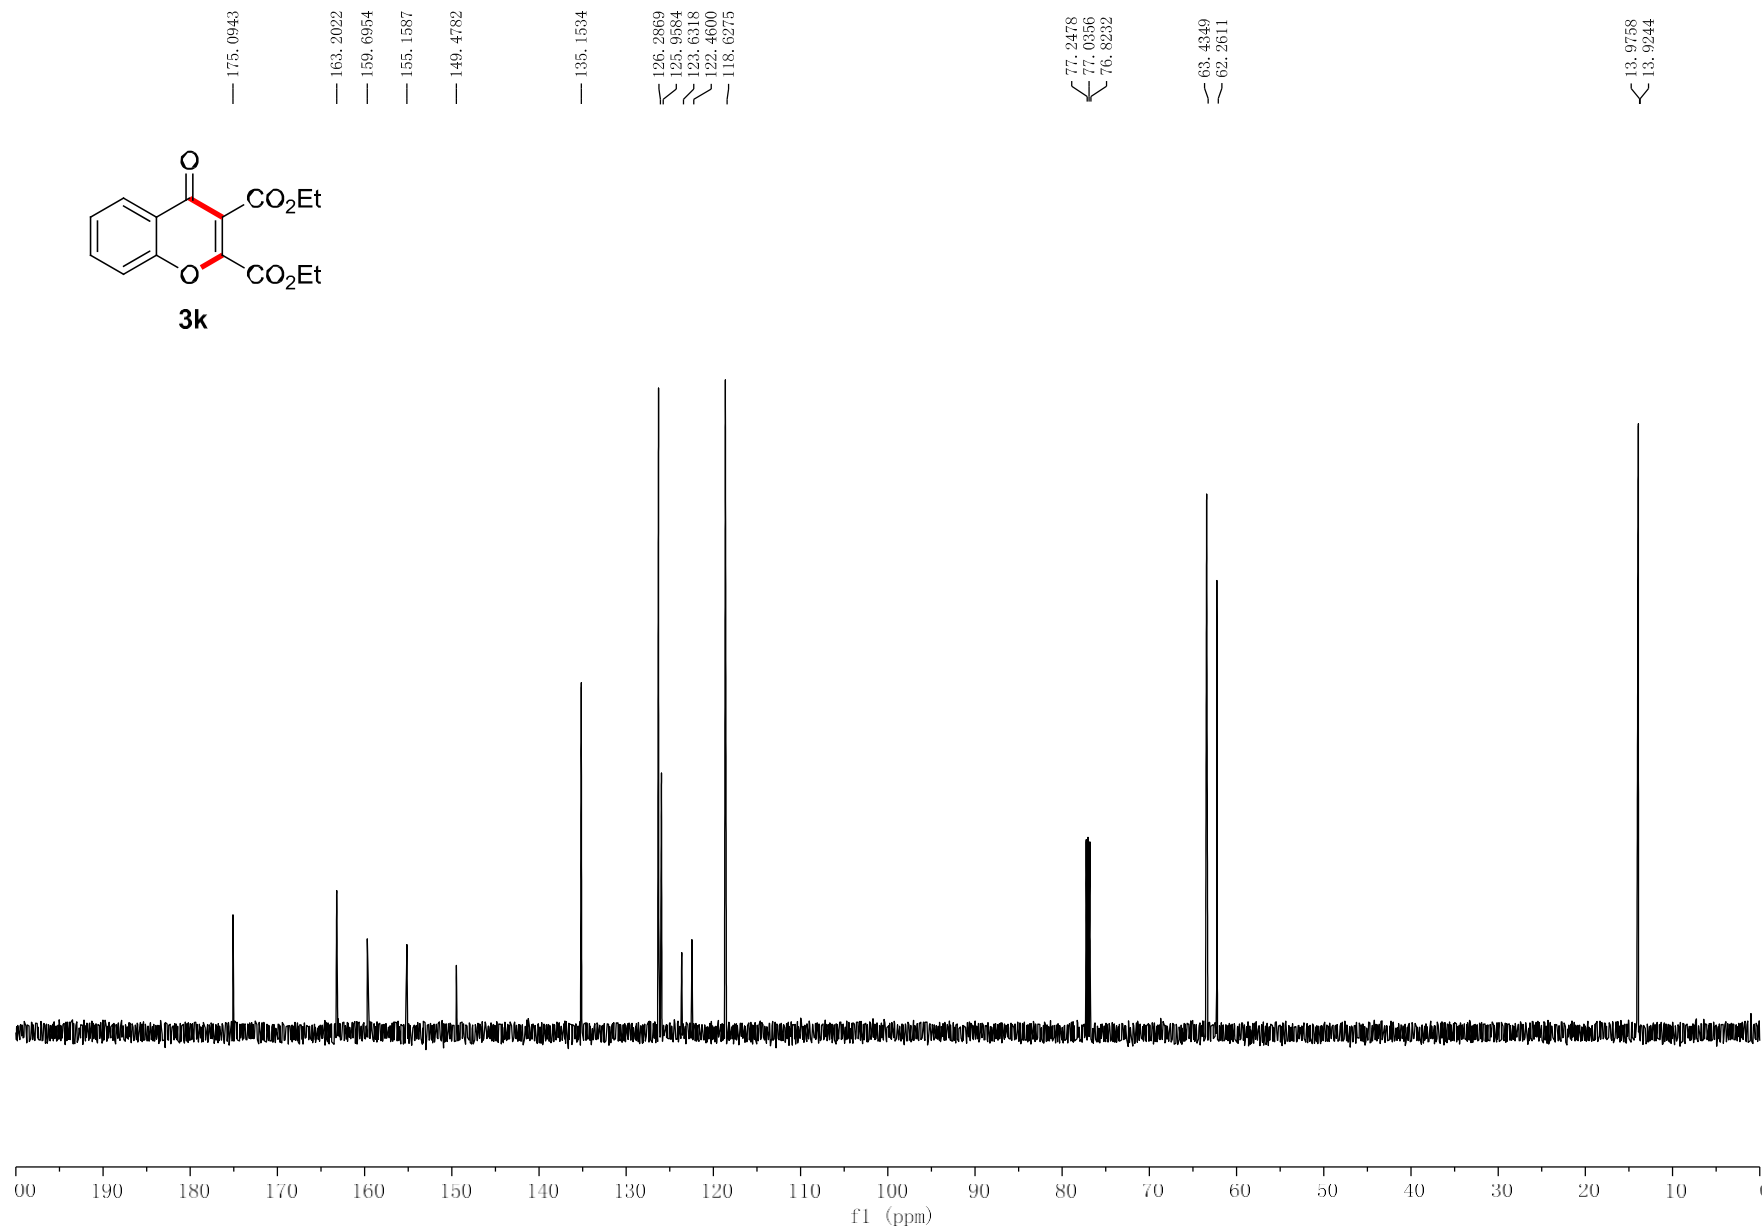



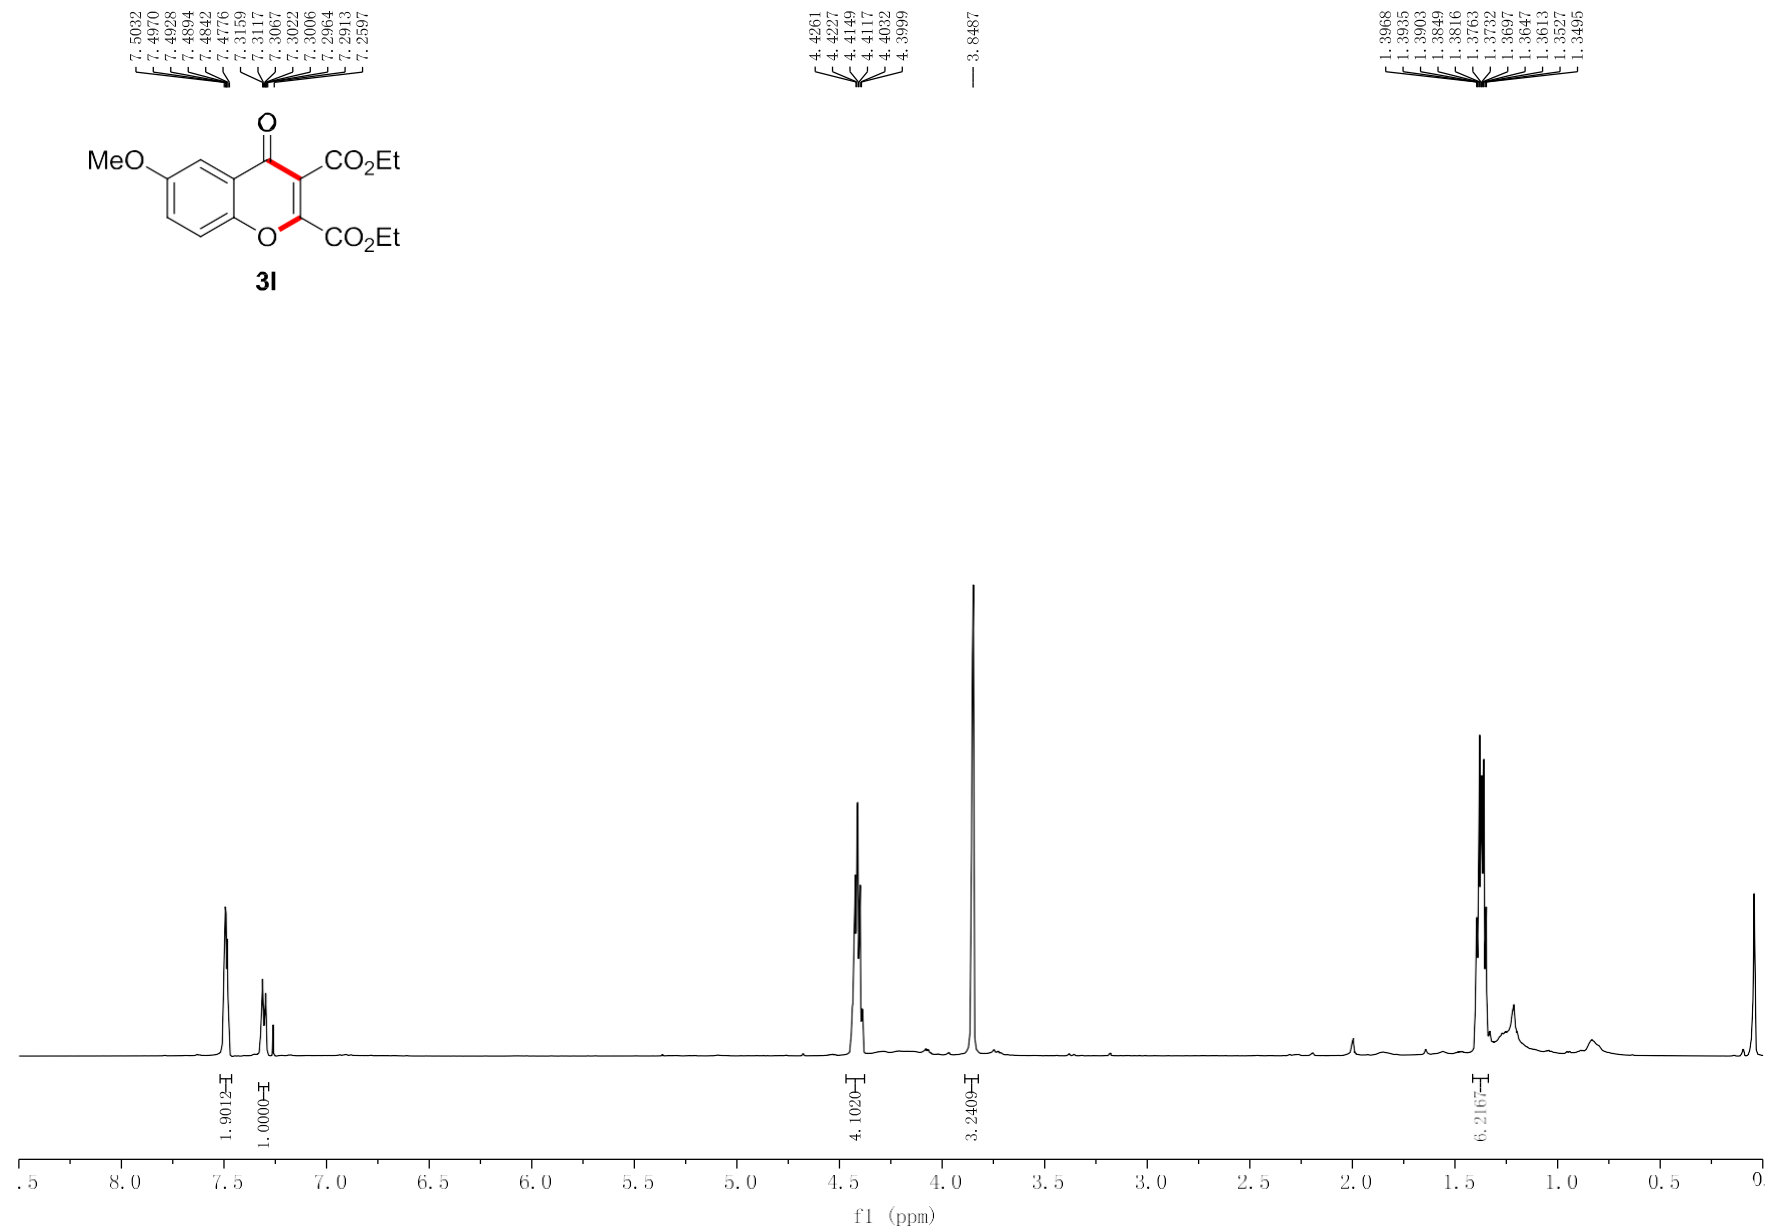

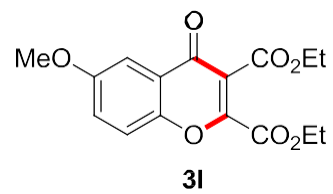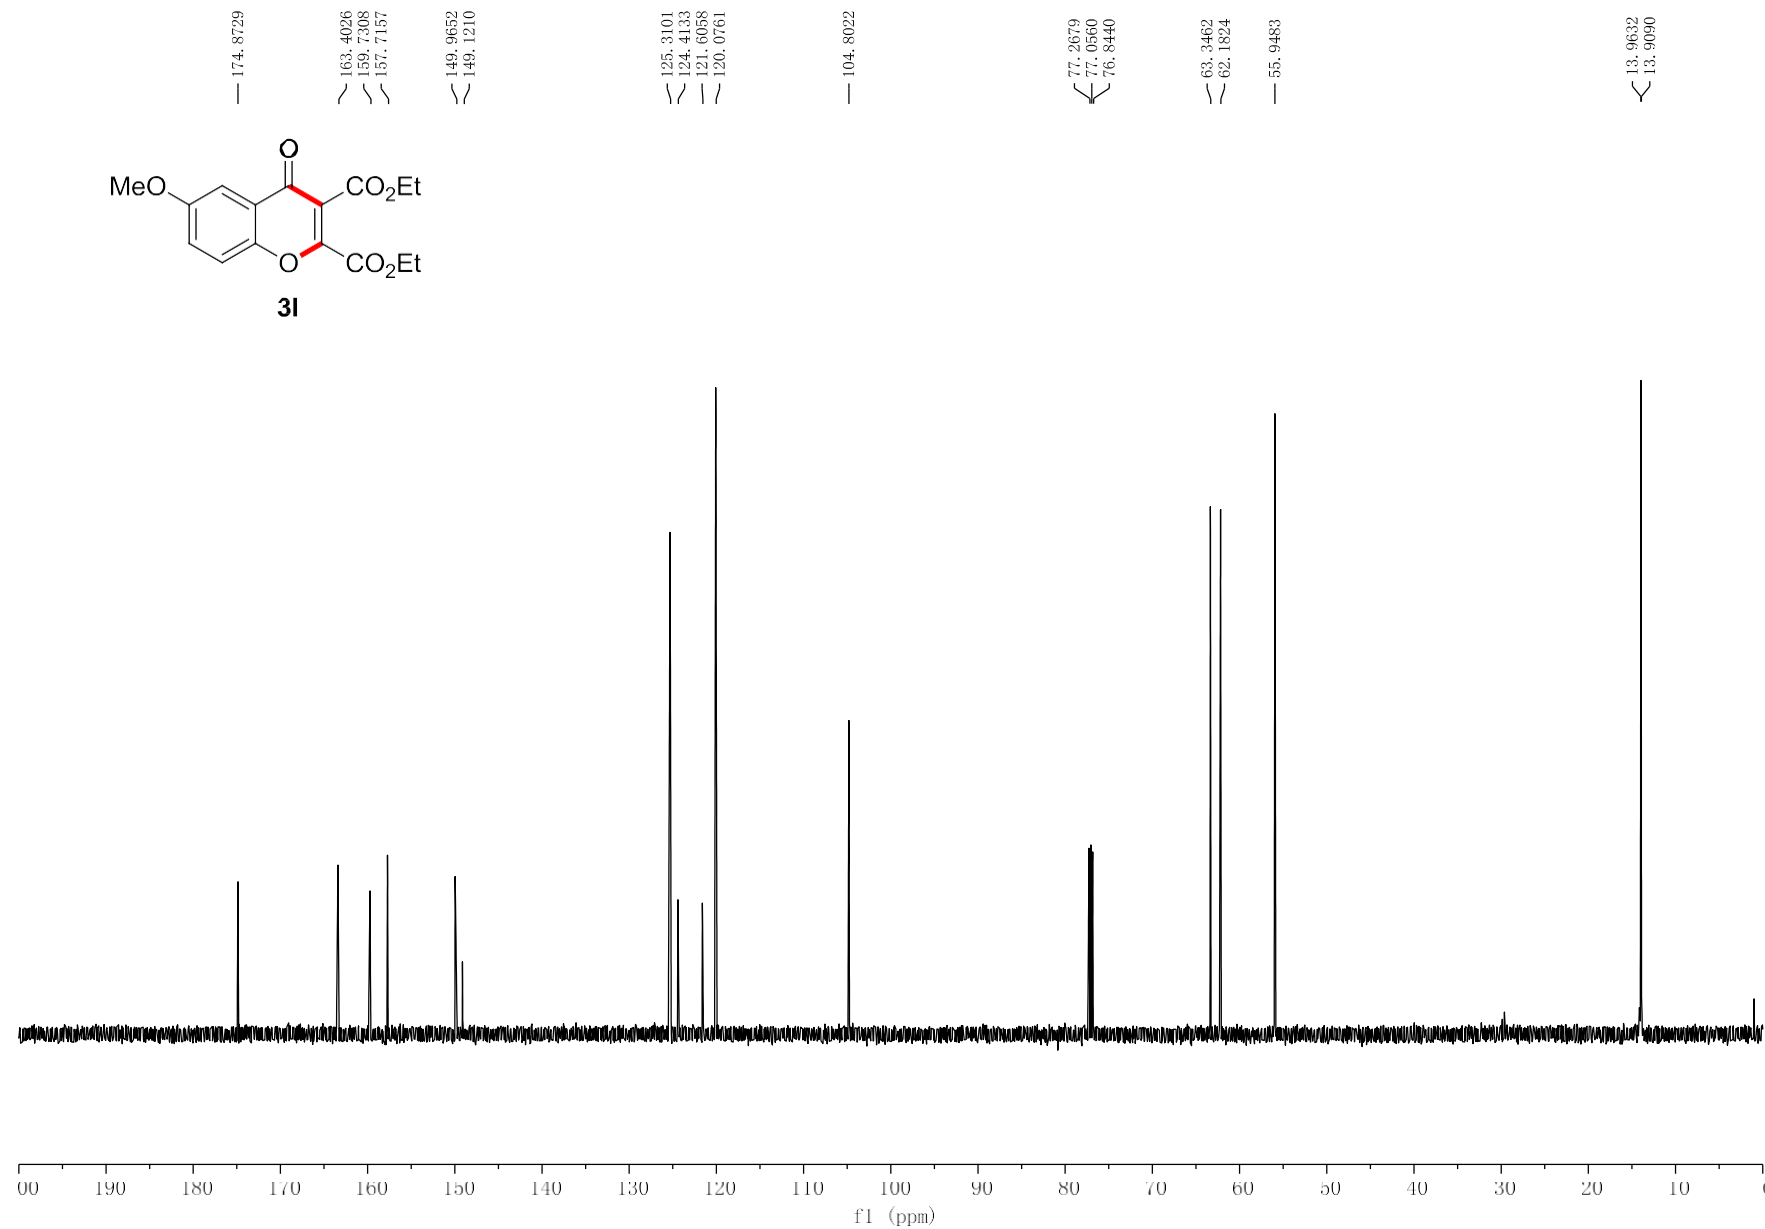

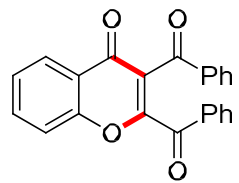

3m

8.2749  
8.2617  
7.9558  
7.9434  
7.9030  
7.8909  
7.8890  
7.8025  
7.8003  
7.7883  
7.7765  
7.7742  
7.6673  
7.6549  
7.6425  
7.5761  
7.5637  
7.5483  
7.5334  
7.5184  
7.5125  
7.5061  
7.4996  
7.4864  
7.4508  
7.4379  
7.4249  
7.2602

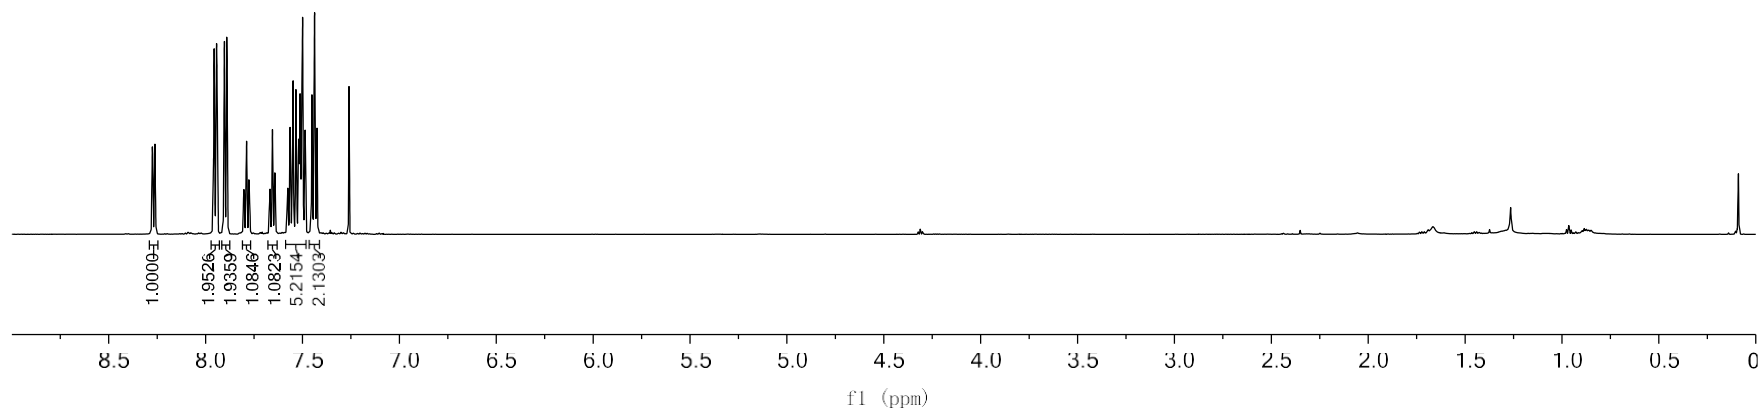

— 191.6204  
— 187.3425  
— 175.8932

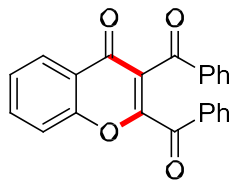

**3m**

— 158.5036  
— 155.0969  
— 136.8185  
— 135.1104  
— 134.6925  
— 134.2035  
— 133.6890  
— 130.1306  
— 129.2149  
— 128.8186  
— 128.6015  
— 126.5317  
— 126.2790  
— 126.0425  
— 124.1918  
— 118.4615

— 77.2673  
— 77.0554  
— 76.8435

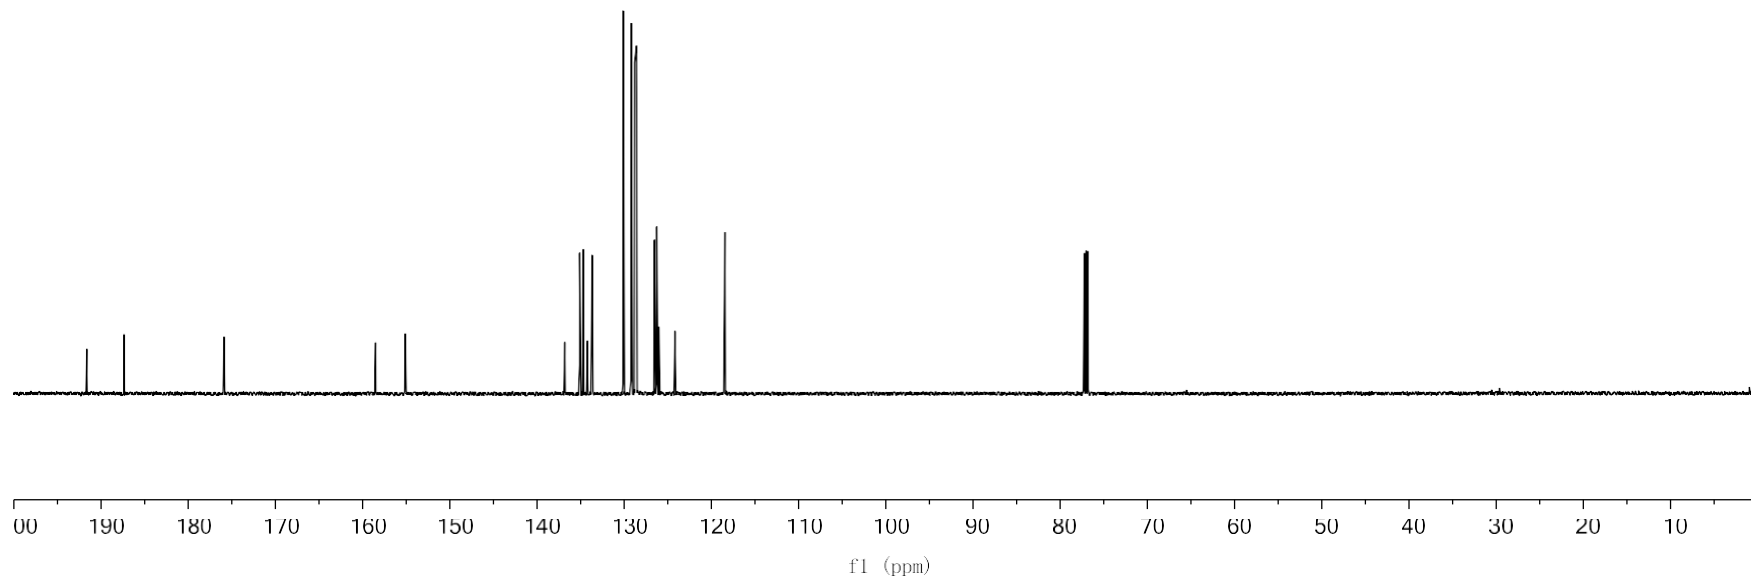

8.1678  
8.1529  
7.7296  
7.7176  
7.7152  
7.6466  
7.5343  
7.5324  
7.5112  
7.4983  
7.4866  
7.0157  
7.0117  
7.0008  
6.9969  
6.9153  
6.9114

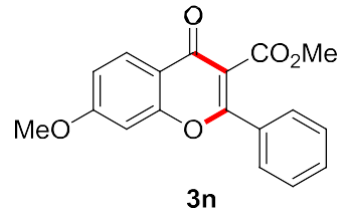

3.9176  
3.7851

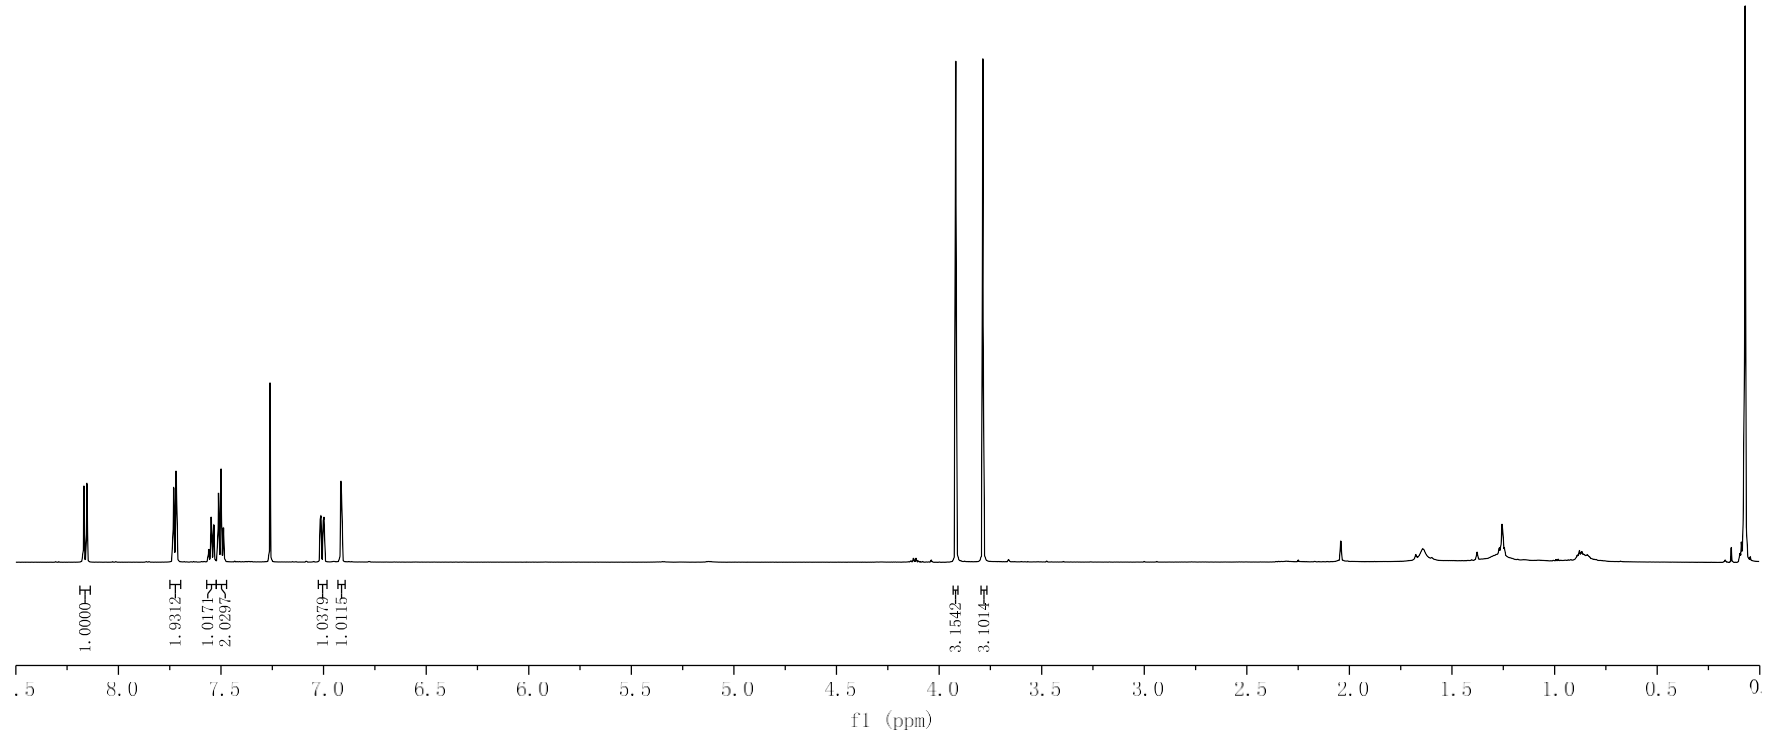

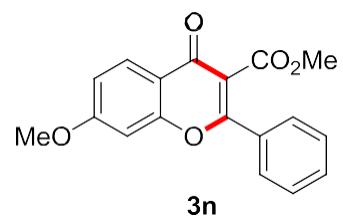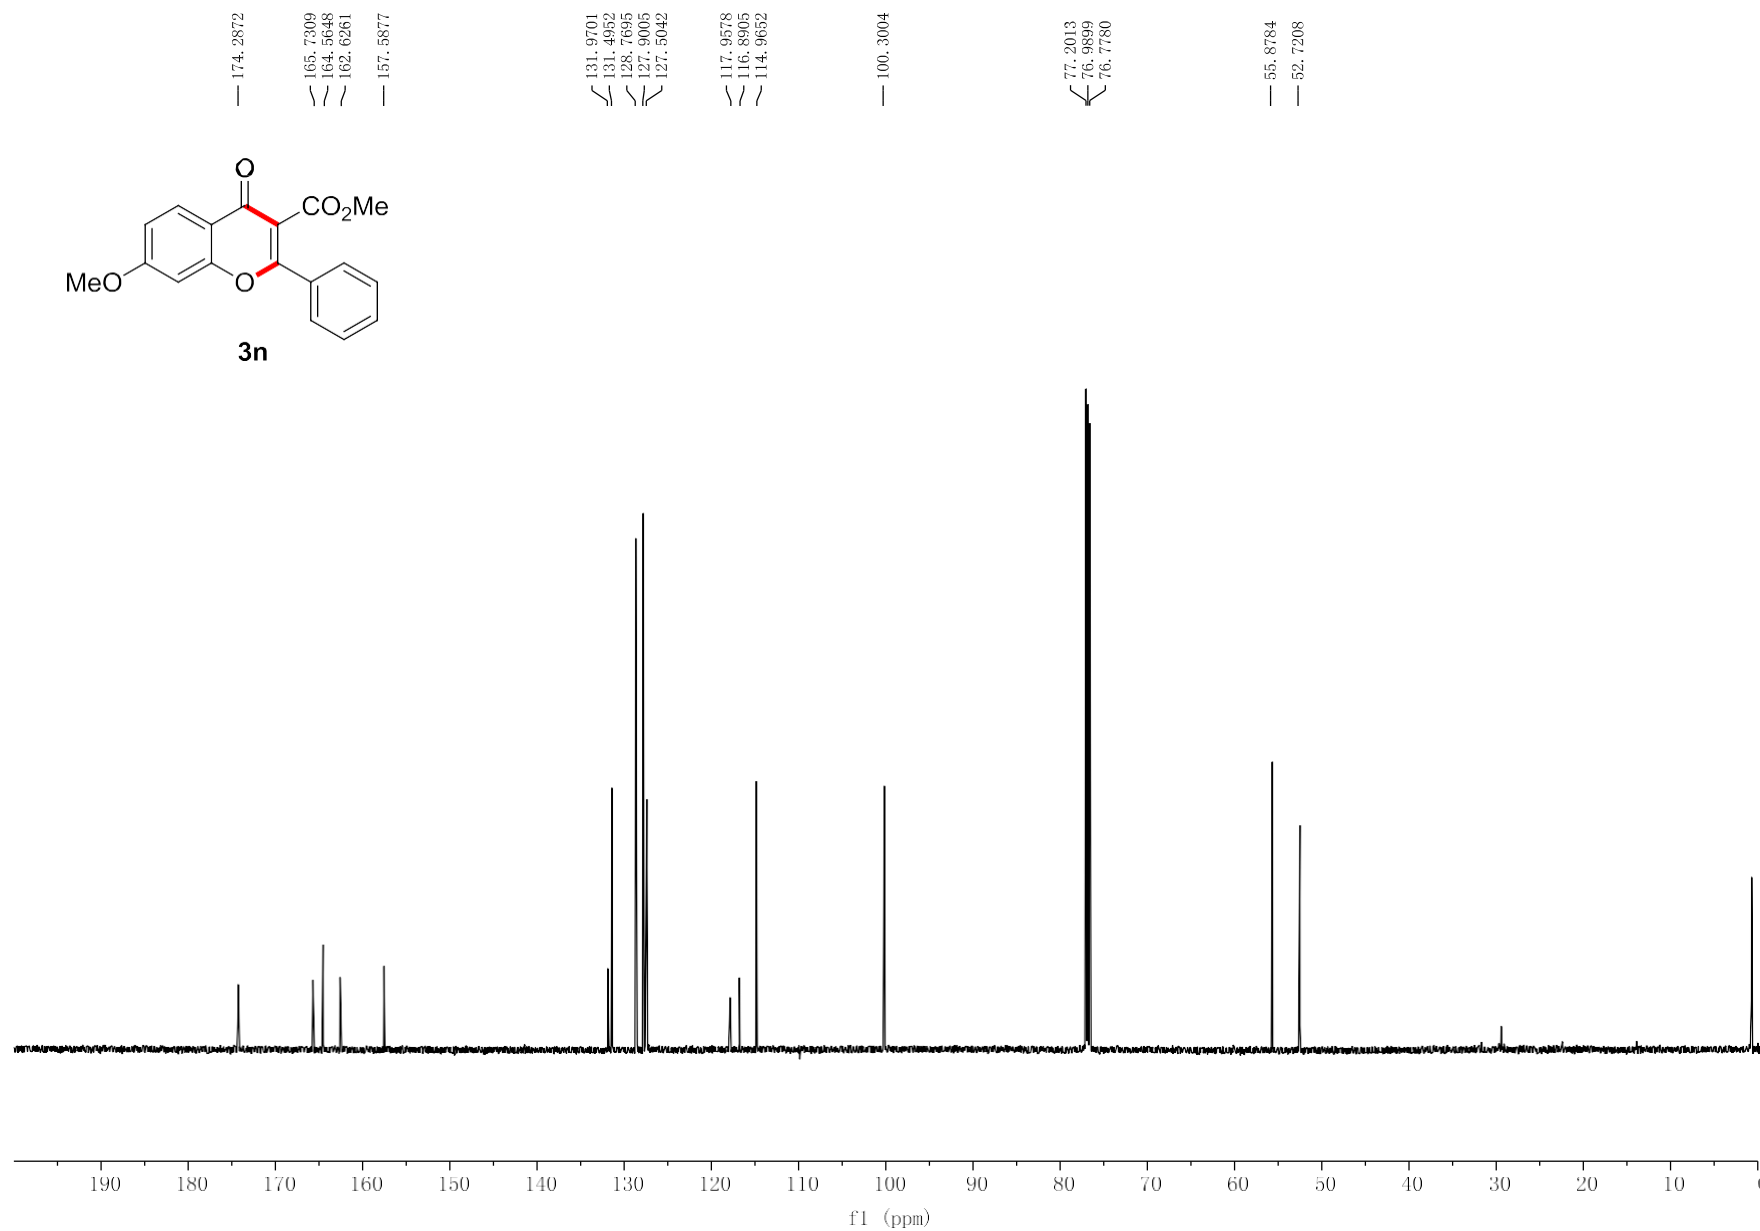

8.1678  
8.1530  
7.7431  
7.7309  
7.5426  
7.5303  
7.5044  
7.4915  
7.0120  
7.0082  
6.9972  
6.9934  
6.9100  
6.9062

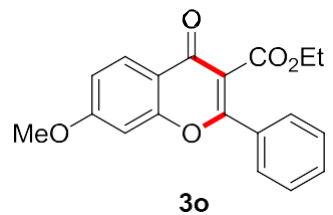

4.2813  
4.2694  
4.2575  
4.2456  
3.9155

1.1763  
1.1644  
1.1525

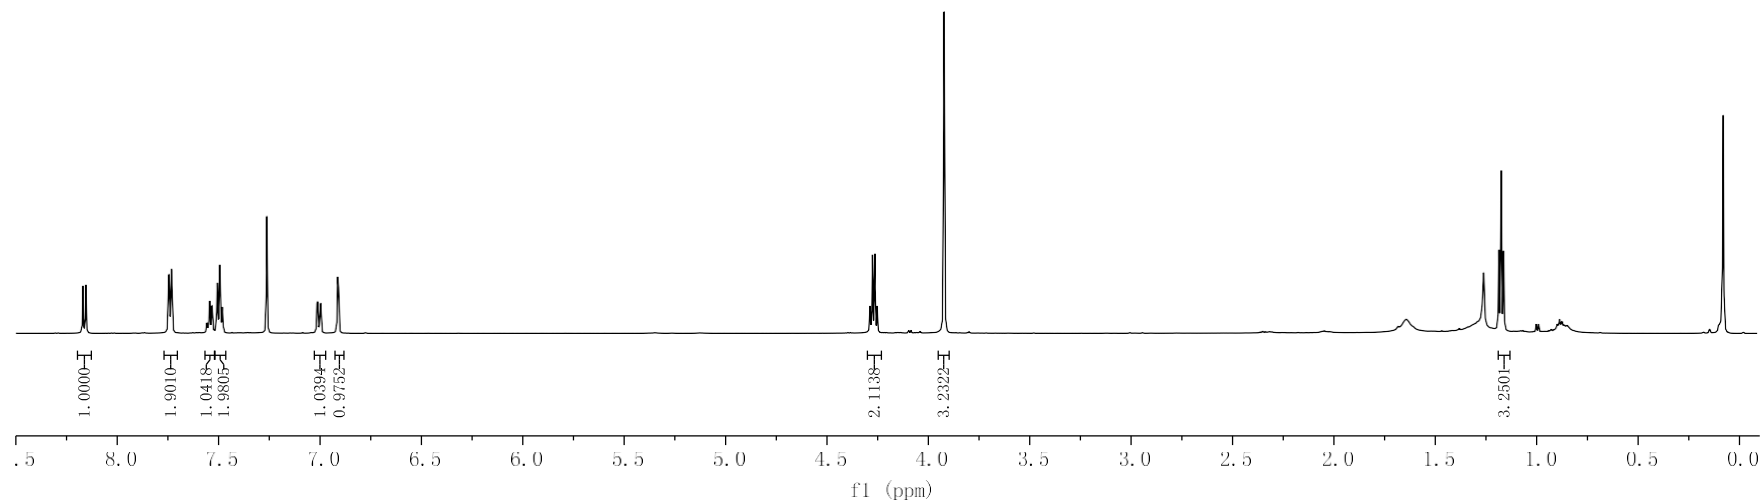

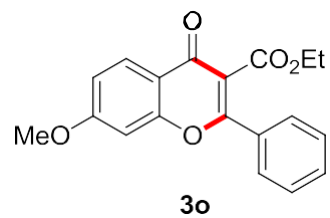

— 174.3212  
 ( 165.1386  
 ( 164.5243  
 — 162.5741  
 — 157.6061

( 132.0467  
 ( 131.4071  
 ( 128.6832  
 ( 128.0122  
 ( 127.5094

( 118.2711  
 ( 116.9739  
 ( 114.9154

— 100.2973

( 77.2078  
 ( 76.9964  
 ( 76.7844

— 61.8069

— 55.8726

— 13.8141

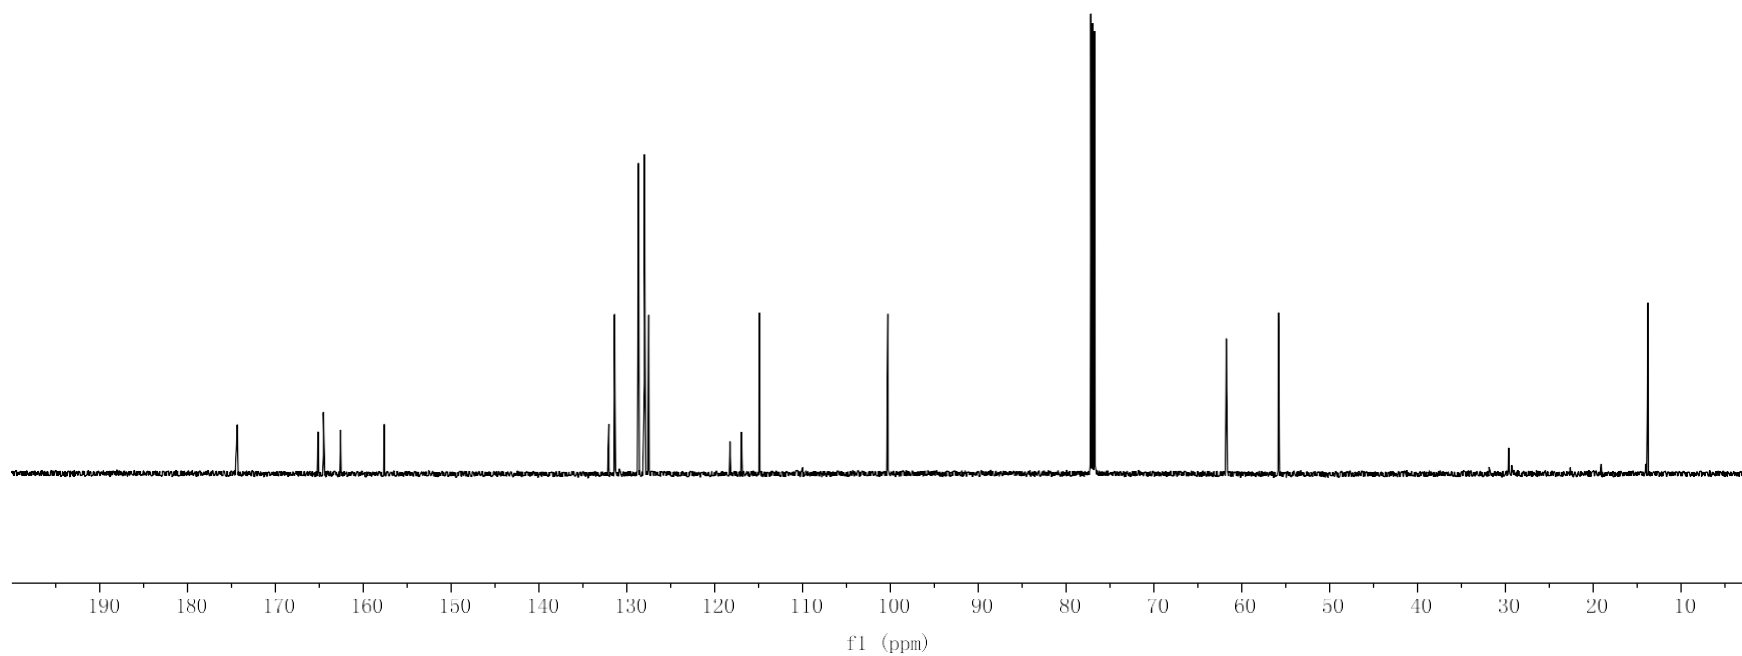



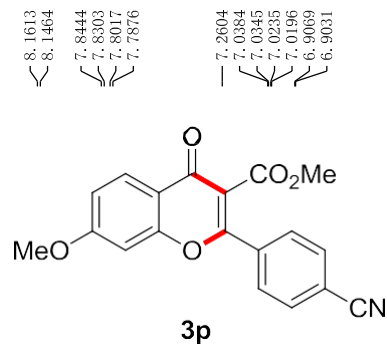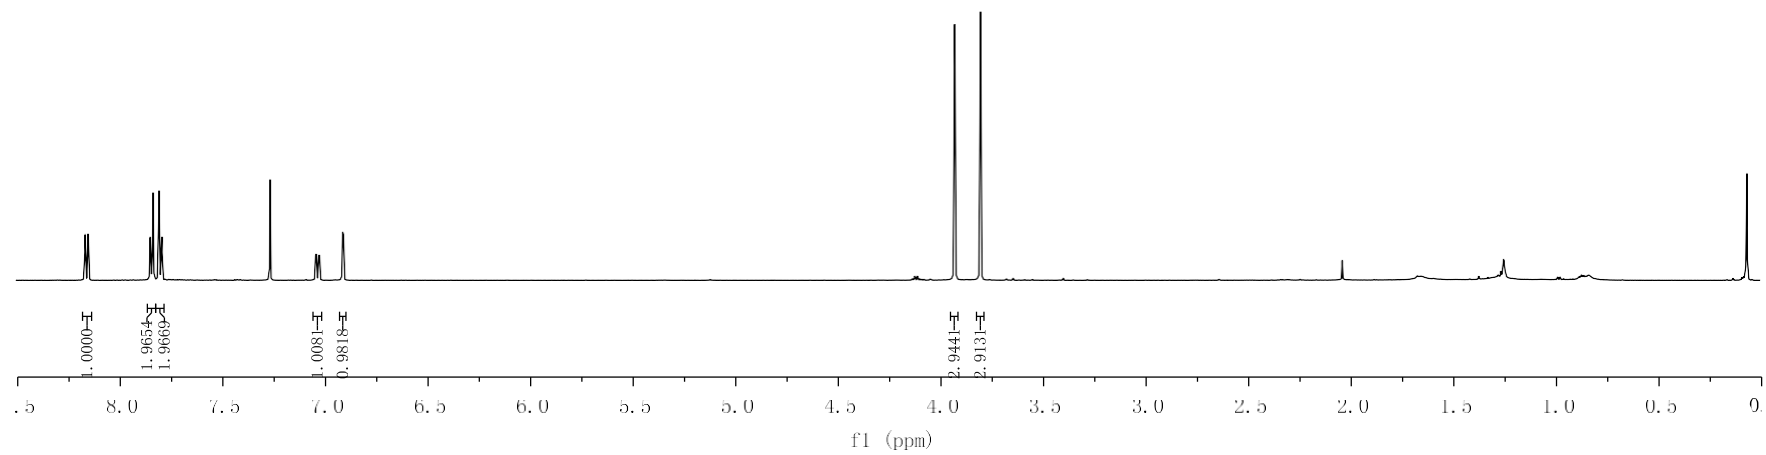

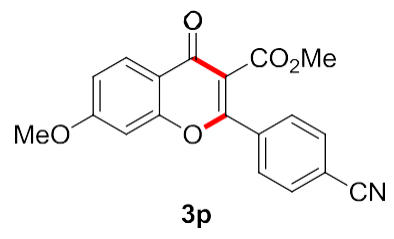

173.8190

165.0760  
164.8795

160.2022  
157.5047

136.0751  
132.4785  
128.6538  
127.6200

118.9755  
117.7441  
116.8323  
115.3840  
115.1080

100.3287

77.2212  
77.0096  
76.7978

55.9739  
53.0030

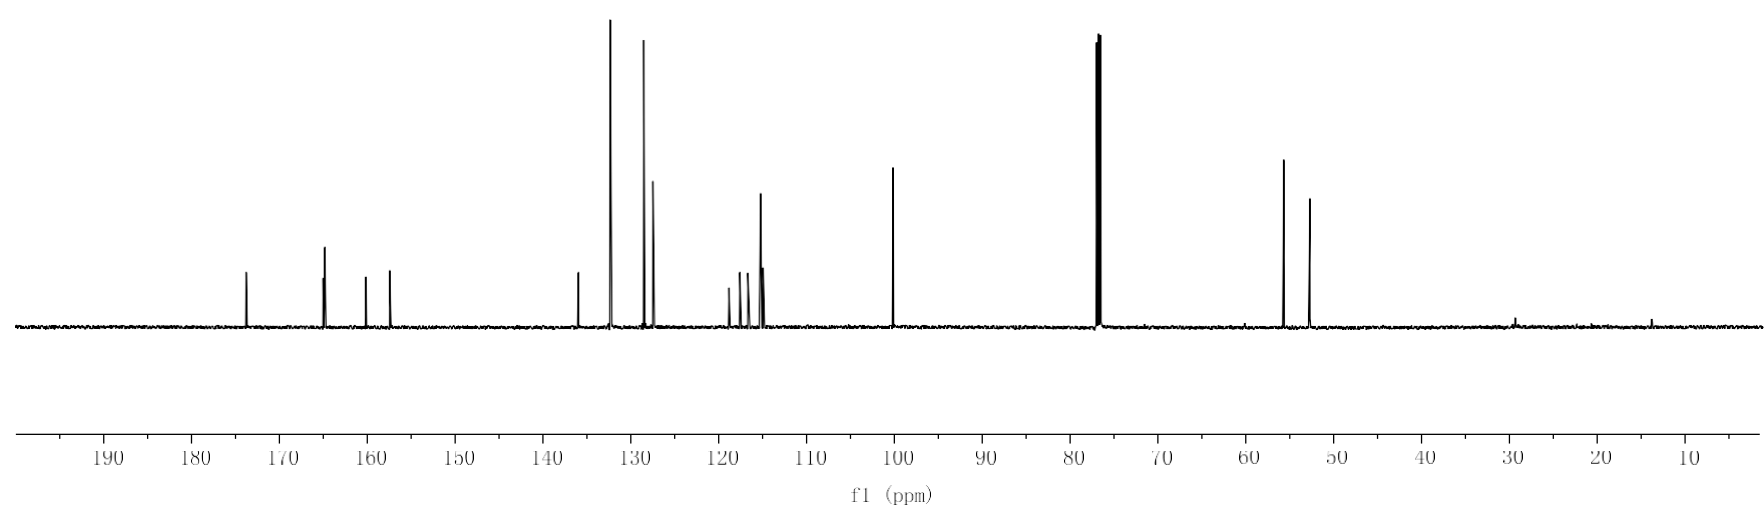

8.1521  
8.1373  
7.6726  
7.6583  
7.4824  
7.4682  
7.2600  
7.0178  
7.0139  
7.0029  
6.9991  
6.9022  
6.8984  
3.9197  
3.8011

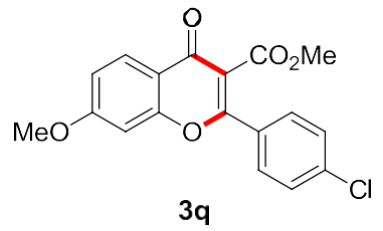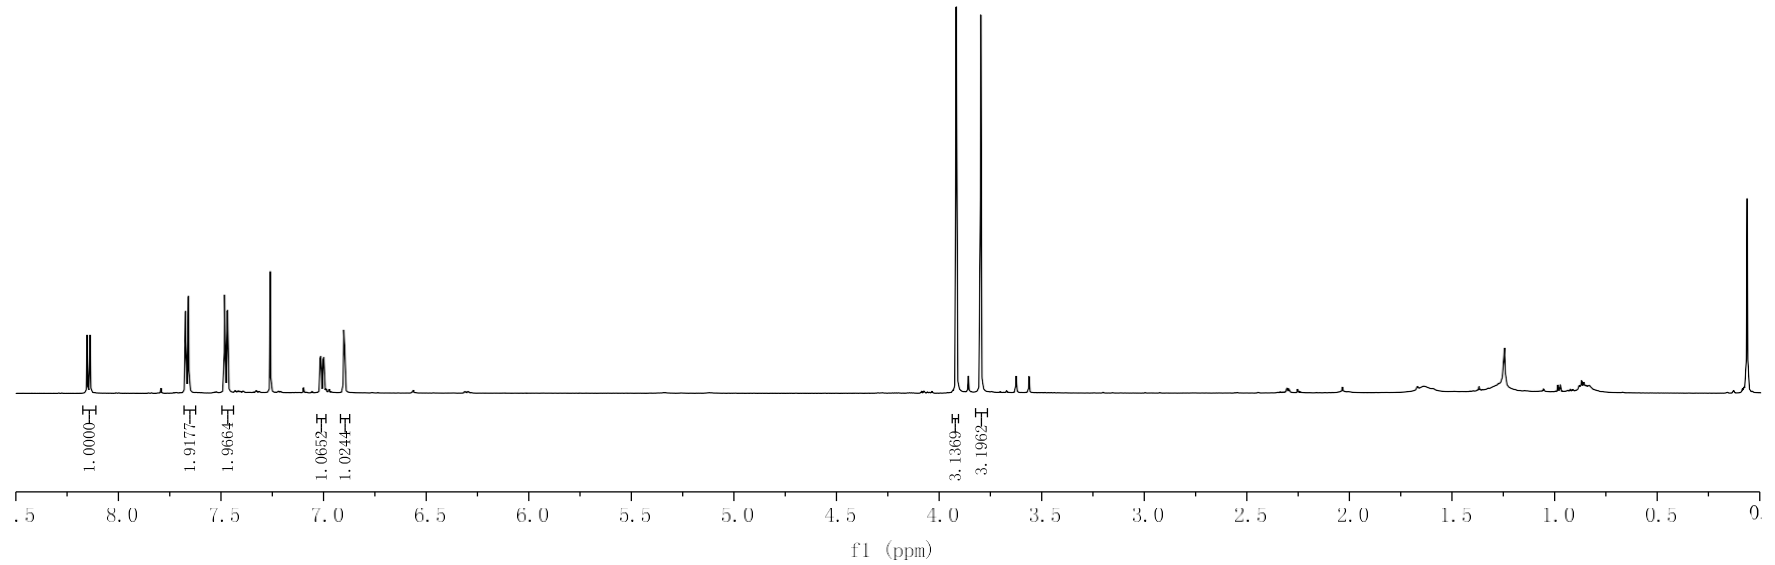

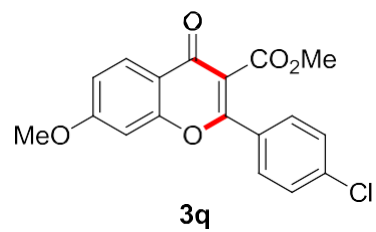

174.1159

165.5271  
164.6653  
161.3297  
157.5045

137.8774

130.3415  
129.2611  
129.1416  
127.5237

118.0803  
116.8082  
113.0904

100.2846

77.2016  
76.9902  
76.7784

55.9089  
52.8594

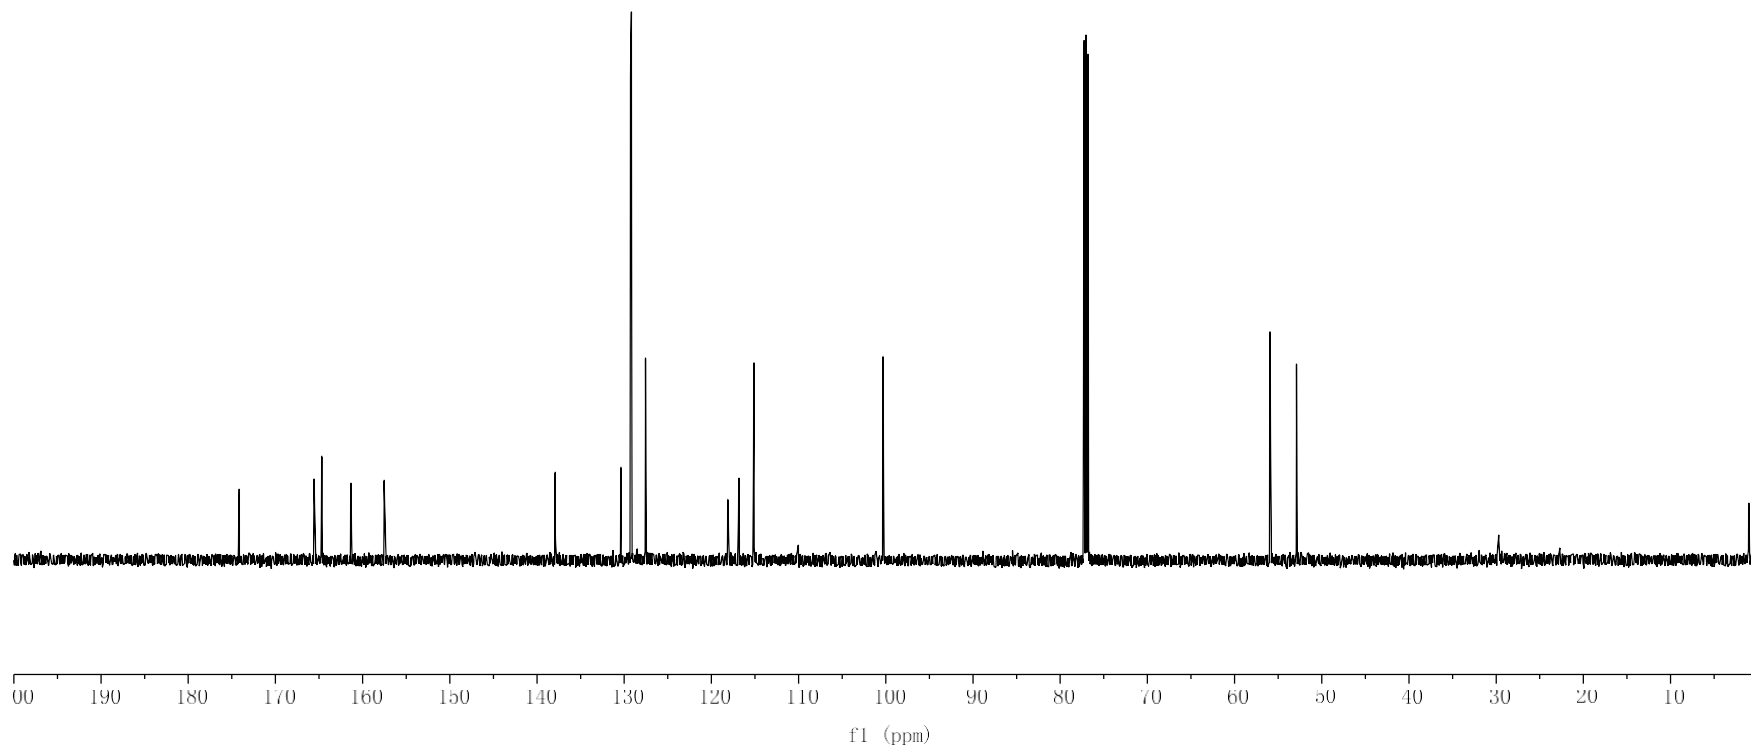

8.1621  
8.1472  
7.8519  
7.8382  
7.7665  
7.7527  
7.2600  
7.0294  
7.0256  
7.0146  
7.0107  
6.9091  
6.9053  
3.9228  
3.7992

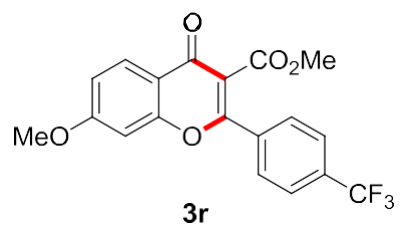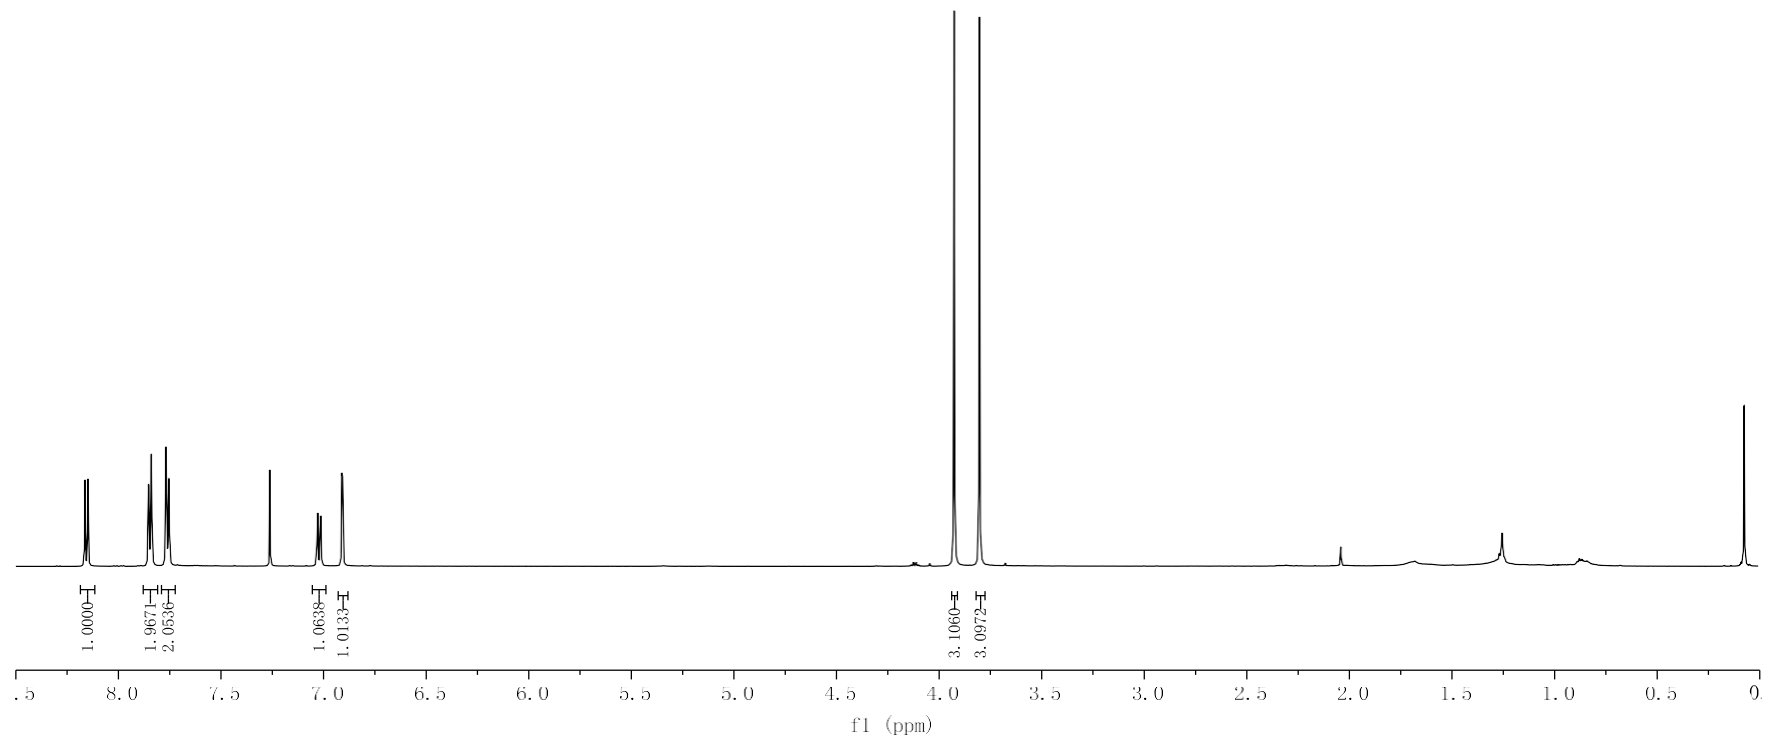

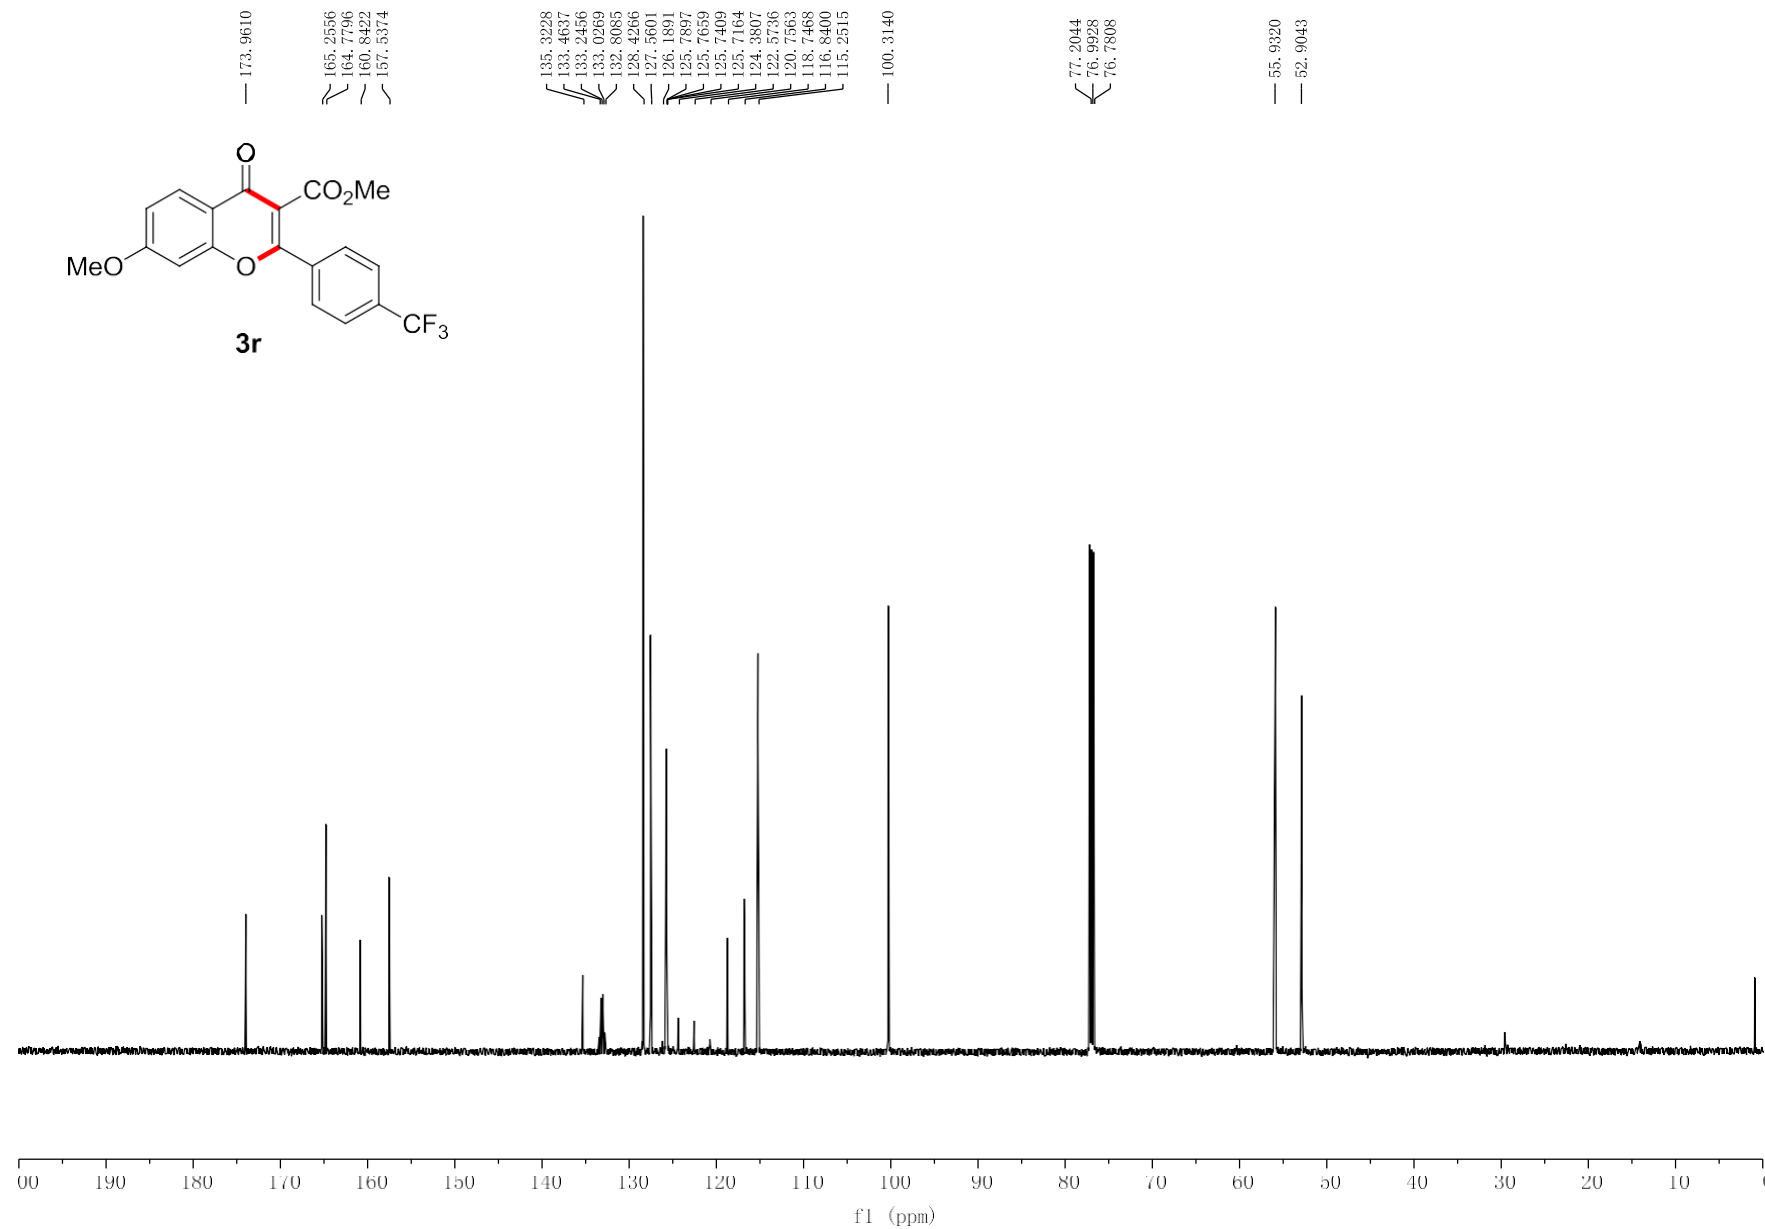

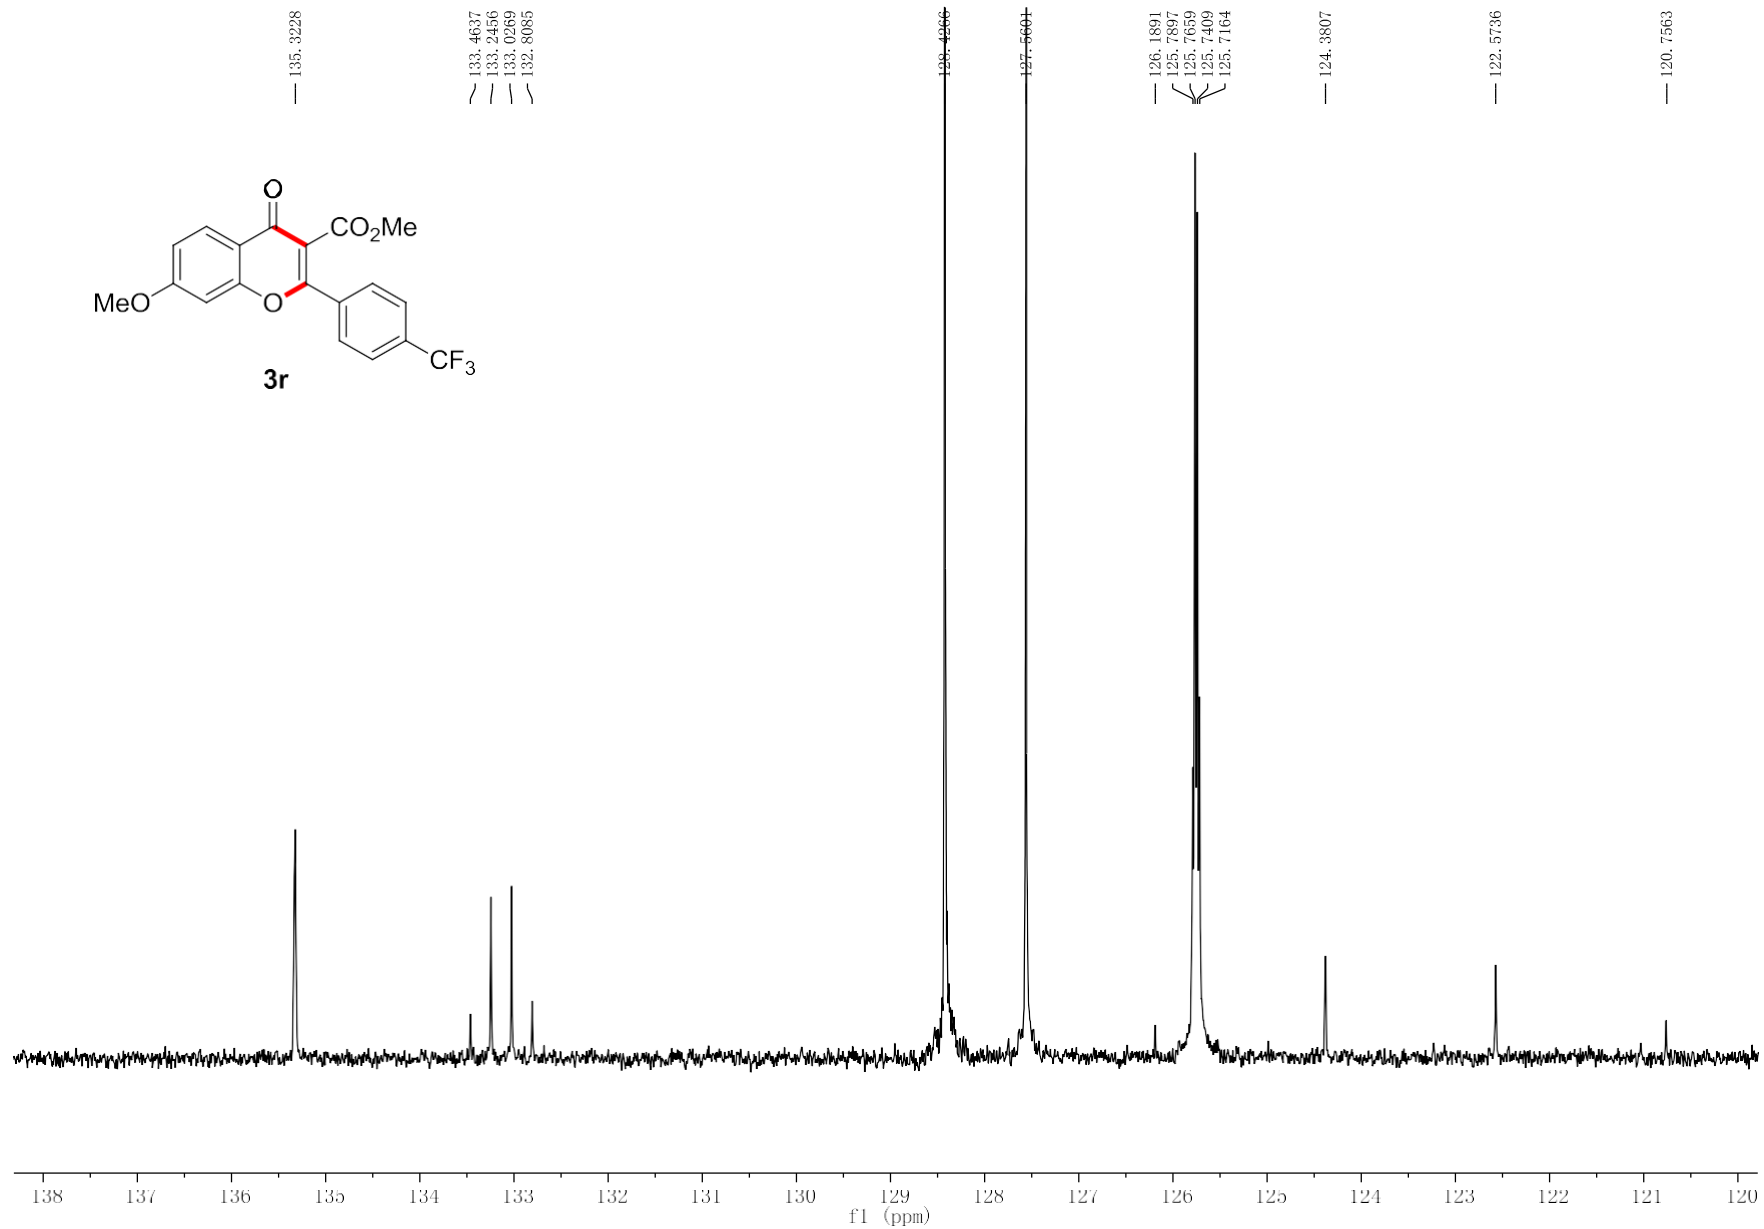

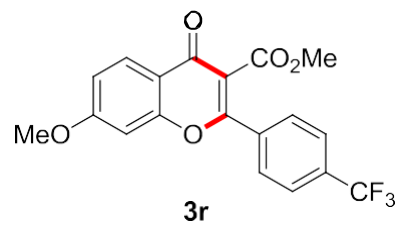

— 63.0530

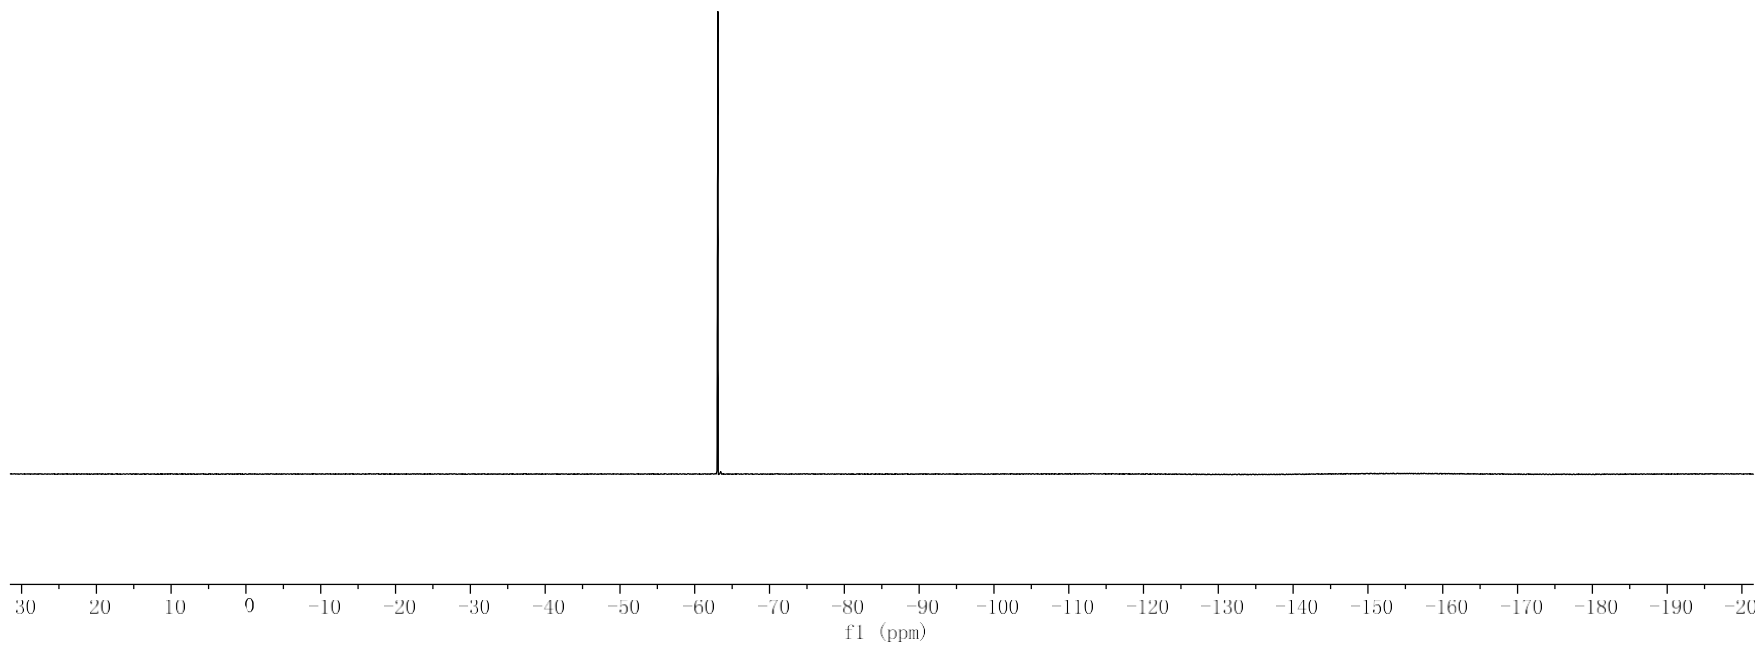

Supplement: c5ra24634b1.pdf [file c5ra24634b1.pdf]
